# Supplementary material
Source: MDPI journal article supplement (https://www.mdpi.com/2225-1154/6/3/67)
Supplement: s1 [file s1]

Archive with 6 entries (6 files):
- Tiepolo & al-Supplementarty Material Table 2S-edited.docx
- Tiepolo & al-Supplementarty Material Table 2S-english-changes.pdf
- Tiepolo & al-Supplementary material Equations 1S-edited.docx
- Tiepolo & al-Supplementary material Equations 1S-english-changes.pdf
- Tiepolo & al-Supplementary material Table 1S-edited.docx
- Tiepolo & al-Supplementary material Table 1S-english-changes.pdf
