# Supplementary material
Source: MDPI journal article supplement (https://www.mdpi.com/2225-1154/6/3/67)
Supplement: s1 [file s1 › Tiepolo & al-Supplementarty Material Table 2S-edited.docx]

**Supplementary Materials: Multihazard Risk Assessment for Planning with Climate in the Dosso Region, Niger**

Maurizio Tiepolo, Maurizio Bacci, Sarah Braccio

**Table S2.** Disaster frequency in the Dosso region (Niger) according municipality and settlement, 2011–2017

| **Municipality** | **Settlement** | **P2012** | **Disaster category** | **Disaster year** | **Disaster** |
| --- | --- | --- | --- | --- | --- |

|  |  |  | **PF** | **RF** | **D** | **Multi** | **2011** | **2012** | **2013** | **2014** | **2015** | **2016** | **2017** | **n. >1** |
| --- | --- | --- | --- | --- | --- | --- | --- | --- | --- | --- | --- | --- | --- | --- |
| Bana | Bana | 3922 | 1 |  |  | 1 | 1 |  |  |  |  |  | 1 | 2 |
| Bana | Bana | 3922 |  |  | 1 |  |  |  |  | 1 |  |  |  |  |
| Bana | Bizougou (Bezougou) | 308 | 1 |  |  |  |  |  |  |  |  |  | 1 |  |
| Bana | Dogan Dadji | 220 |  |  | 1 | 1 |  |  | 1 | 1 |  |  |  | 2 |
| Bana | Dogon Dagi | 220 | 1 |  |  |  |  |  |  |  |  |  | 1 |  |
| Bana | Faska | 1534 | 1 |  |  | 1 |  |  |  |  |  |  | 1 |  |
| Bana | Faska | 1534 |  |  | 1 |  |  |  | 1 | 1 |  |  | 1 | 3 |
| Bana | Garin Maikabi | 206 | 1 |  |  |  |  |  |  |  |  |  | 1 |  |
| Bana | Hankoura | 1609 | 1 |  |  | 1 |  |  |  |  |  |  | 1 |  |
| Bana | Hankoura | 1609 |  |  | 1 |  |  |  | 1 | 1 |  |  | 1 | 3 |
| Bana | Illela II | 152 | 1 |  |  |  |  |  |  |  |  |  | 1 |  |
| Bana | Kantalangou | 158 | 1 |  |  |  |  |  |  |  |  |  | 1 |  |
| Bana | Kote Kote | 597 | 1 |  |  | 1 |  |  |  |  |  |  | 1 |  |
| Bana | Koté Koté | 597 |  |  | 1 |  |  |  | 1 | 1 |  |  |  | 2 |
| Bana | Machaya | 189 | 1 |  |  |  |  |  |  |  |  |  | 1 |  |
| Bana | Malam Kadi | 828 | 1 |  |  | 1 |  |  |  |  |  |  | 1 |  |
| Bana | Mallam Kadi | 828 |  |  | 1 |  |  |  | 1 | 1 |  |  | 1 | 3 |
| Bana | Masama | 288 | 1 |  |  |  |  |  |  |  |  |  | 1 |  |
| Bana | Niakoye Tonga | 3081 |  |  | 1 | 1 |  |  | 1 | 1 |  |  |  | 2 |
| Bana | Niyakoye Tounga | 3081 | 1 |  |  |  |  |  |  |  |  |  | 1 |  |
| Bana | Tondi Hinza | 368 |  |  | 1 |  |  |  | 1 | 1 |  |  | 1 | 3 |
| Bana | Toudou Wada | 250 |  |  | 1 | 1 |  |  | 1 | 1 |  |  |  | 2 |
| Bana | Toudoun Wada | 250 | 1 |  |  |  |  |  |  |  |  |  | 1 |  |
| Bana | Tounga Tegui | 1324 |  |  | 1 | 1 |  |  | 1 | 1 |  |  |  | 2 |
| Bana | Tounouga Tegui | 1324 | 1 |  |  |  |  |  |  |  |  |  | 1 |  |
| Bengou | Bengou | 12329 | 1 |  |  | 1 | 1 | 1 |  |  |  |  | 1 | 3 |
| Bengou | Bengou | 12329 |  |  | 1 |  |  |  |  | 1 |  |  |  |  |
| Bengou | Borin Yaki |  | 1 |  |  |  |  |  |  |  |  |  | 1 |  |
| Bengou | Garin Malam | 600 | 1 |  |  |  |  |  |  |  |  |  | 1 |  |
| Bengou | Guiwa (Gouiwa CPR) | 296 | 1 |  |  |  |  |  |  |  |  |  | 1 |  |
| Bengou | Hamdallaye | 248 | 1 |  |  |  |  |  |  |  |  |  | 1 |  |
| Bengou | Korefade |  | 1 |  |  |  |  |  |  |  |  |  | 1 |  |
| Bengou | Niakoyi |  | 1 |  |  |  |  |  |  |  |  |  | 1 |  |
| Birni N’Gaoure | Batemberi | 1276 |  |  | 1 |  |  |  |  |  |  | 1 |  |  |
| Birni N’Gaoure | Boula Gaouri Peulh | 259 |  |  | 1 |  |  |  |  |  |  | 1 |  |  |
| Birni N’Gaoure | Boula Oula | 141 |  |  | 1 |  |  |  |  |  |  | 1 |  |  |
| Birni N’Gaoure | Boundou Koukoye | 308 |  |  | 1 |  |  |  |  |  |  | 1 |  |  |
| Birni N’Gaoure | Dobaga | 1086 |  |  | 1 |  |  |  |  | 1 |  | 1 |  | 2 |
| Birni N’Gaoure | Dounoudibi Peulh | 268 |  |  | 1 |  |  |  |  |  |  | 1 |  |  |
| Birni N’Gaoure | Dounoudibi Zarma | 776 |  |  | 1 |  |  |  |  |  |  | 1 |  |  |
| Birni N’Gaoure | Garou Peul | 683 |  |  | 1 |  |  |  |  | 1 |  | 1 |  | 2 |
| Birni N’Gaoure | Garou Zarma | 684 |  |  | 1 |  |  |  |  | 1 |  | 1 |  | 2 |
| Birni N’Gaoure | Haoulawal Djerma | 764 |  |  | 1 |  |  |  |  | 1 |  | 1 |  | 2 |
| Birni N’Gaoure | Haoulawal Peulh | 329 |  |  | 1 |  |  |  |  |  |  | 1 |  |  |
| Birni N’Gaoure | Kaba Karba | 77 |  |  | 1 |  |  |  |  |  |  | 1 |  |  |
| Birni N’Gaoure | Karra | 3115 |  |  | 1 |  |  |  |  | 1 |  | 1 |  | 2 |
| Birni N’Gaoure | Kofo | 404 |  |  | 1 |  |  |  |  | 1 |  |  |  |  |
| Birni N’Gaoure | Kourfaré | 1262 |  |  | 1 |  |  |  |  | 1 |  | 1 |  | 2 |
| Birni N’Gaoure | Menné | 324 |  |  | 1 |  |  |  |  |  |  | 1 |  |  |
| Birni N’Gaoure | Sakirey Peulh | 179 |  |  | 1 |  |  |  |  |  |  | 1 |  |  |
| Birni N’Gaoure | Sakirey Peulh Zarma | 395 |  |  | 1 |  |  |  |  |  |  | 1 |  |  |
| Birni N’Gaoure | Setti | 422 |  |  | 1 |  |  |  |  |  |  | 1 |  |  |
| Birni N’Gaoure | Sillia | 296 |  |  | 1 |  |  |  |  |  |  | 1 |  |  |
| Birni N’Gaoure | Tchéringui | 294 |  |  | 1 |  |  |  |  | 1 |  | 1 |  | 2 |
| Birni N’Gaoure | Tcheygao | 492 |  |  | 1 |  |  |  |  |  |  | 1 |  |  |
| Birni N’Gaoure | Walatonou | 327 |  |  | 1 |  |  |  |  |  |  | 1 |  |  |
| Birni N’Gaoure | Windé | 365 |  |  | 1 |  |  |  |  |  |  | 1 |  |  |
| Birni N'Gaoure | Donoudibi Djerma | 776 | 1 |  |  |  |  |  |  |  | 1 |  |  |  |
| Birni N'Gaoure | Karra | 3115 | 1 |  |  |  |  |  |  |  |  | 1 |  |  |
| Birni N'Gaoure | Kiota |  | 1 |  |  |  |  |  |  |  |  | 1 |  |  |
| Dan Kassari | Bawada Guida | 549 | 1 |  |  |  |  |  |  |  | 1 |  |  |  |
| Dan Kassari | Dan Kassari | 3874 | 1 |  |  |  |  |  |  |  | 1 |  |  |  |
| Dan Kassari | Gouba |  | 1 |  |  |  |  |  |  |  | 1 |  |  |  |
| Dan Kassari | Goudi |  | 1 |  |  |  |  |  |  |  | 1 |  |  |  |
| Dankassari | Askia | 670 |  |  | 1 |  | 1 |  |  | 1 |  |  |  | 2 |
| Dankassari | Bare Bari | 999 |  |  | 1 |  |  |  |  |  | 1 |  |  |  |
| Dankassari | Bawada Dagi | 2103 |  |  | 1 |  |  |  |  |  | 1 |  | 1 | 2 |
| Dankassari | Bawada Guida | 549 |  |  | 1 |  | 1 |  |  |  | 1 |  |  | 2 |
| Dankassari | Chanono | 1400 |  |  | 1 |  | 1 |  |  |  | 1 |  | 1 | 3 |
| Dankassari | Dankassari | 4559 |  |  | 1 |  |  |  | 1 |  | 1 | 1 |  | 3 |
| Dankassari | Darey Gougui | 69 |  |  | 1 |  | 1 |  |  |  | 1 |  |  | 2 |
| Dankassari | Dogontapki | 4407 |  |  | 1 |  |  |  |  |  | 1 | 1 | 1 | 3 |
| Dankassari | Douzou | 304 |  |  | 1 |  |  |  |  |  |  |  | 1 |  |
| Dankassari | Fanna I | 372 |  |  | 1 |  | 1 |  |  |  |  |  | 1 | 2 |
| Dankassari | Garin Agour | 279 |  |  | 1 |  |  |  |  |  |  |  | 1 |  |
| Dankassari | Garin Mayodo | 195 |  |  | 1 |  |  |  |  |  | 1 |  |  |  |
| Dankassari | Gofawa | 1054 |  |  | 1 |  |  |  |  |  | 1 | 1 |  | 2 |
| Dankassari | Goho | 1041 |  |  | 1 |  |  |  | 1 |  | 1 |  |  | 2 |
| Dankassari | Goubey | 2528 |  |  | 1 |  |  |  |  |  | 1 |  | 1 | 2 |
| Dankassari | Goulbi | 1196 |  |  | 1 |  |  |  |  |  | 1 |  | 1 | 2 |
| Dankassari | Guizara | 157 |  |  | 1 |  |  |  |  |  | 1 |  | 1 | 2 |
| Dankassari | Jarkassa | 454 |  |  | 1 |  | 1 |  |  |  | 1 |  | 1 | 3 |
| Dankassari | Kadandamé | 1671 |  |  | 1 |  | 1 |  |  |  | 1 |  |  | 2 |
| Dankassari | Kamrey I (Kamrey Arawa) | 964 |  |  | 1 |  |  |  |  |  | 1 | 1 |  | 2 |
| Dankassari | Kamrey II (Kamrey Sanke) | 906 |  |  | 1 |  |  |  |  |  |  | 1 |  |  |
| Dankassari | Kaoura Lahama | 707 |  |  | 1 |  | 1 |  |  |  |  |  |  |  |
| Dankassari | Kargui Mallan | 2712 |  |  | 1 |  |  |  |  |  |  | 1 |  |  |
| Dankassari | Karki (K. Malan) | 2961 |  |  | 1 |  | 1 |  | 1 |  | 1 |  |  | 3 |
| Dankassari | Karki Peulh | 408 |  |  | 1 |  |  |  | 1 |  |  | 1 |  | 2 |
| Dankassari | Kolmey | 927 |  |  | 1 |  | 1 |  |  |  | 1 | 1 |  | 3 |
| Dankassari | Kore Gabass | 839 |  |  | 1 |  |  |  |  | 1 |  |  |  |  |
| Dankassari | Korongome | 970 |  |  | 1 |  |  |  |  |  | 1 |  | 1 | 2 |
| Dankassari | Korongomey Peulh | 459 |  |  | 1 |  |  |  |  |  |  |  | 1 |  |
| Dankassari | Koumchi | 307 |  |  | 1 |  |  |  |  |  |  |  | 1 |  |
| Dankassari | Koumey | 762 |  |  | 1 |  | 1 |  |  | 1 | 1 |  |  | 3 |
| Dankassari | Lillato | 722 |  |  | 1 |  |  |  |  |  |  |  | 1 |  |
| Dankassari | Lougou | 366 |  |  | 1 |  | 1 |  |  |  | 1 |  |  | 2 |
| Dankassari | Maraké Peulh | 158 |  |  | 1 |  |  |  |  |  | 1 |  |  |  |
| Dankassari | Marake Rogo (M.R. Peulh) | 827 |  |  | 1 |  |  |  |  |  | 1 |  |  |  |
| Dankassari | Marake Toudou | 633 |  |  | 1 |  |  |  | 1 | 1 | 1 |  |  | 3 |
| Dankassari | Nakigaza (N. Detchi) | 1764 |  |  | 1 |  |  |  |  | 1 | 1 |  | 1 | 3 |
| Dankassari | Nakigaza Sarkin Rouafi | 1367 |  |  | 1 |  |  |  |  |  |  |  | 1 |  |
| Dankassari | Saourin Kaihi | 1272 |  |  | 1 |  |  |  |  |  |  |  | 1 |  |
| Dankassari | Tchito | 1334 |  |  | 1 |  |  |  |  |  | 1 |  |  |  |
| Dankassari | Tchitto Djinbanawa | 744 |  |  | 1 |  |  |  |  |  |  | 1 |  |  |
| Dankassari | Tchitto Sarkin Rouahi | 611 |  |  | 1 |  | 1 |  |  |  |  | 1 |  | 2 |
| Dankassari | Toungana | 183 |  |  | 1 |  | 1 |  |  |  | 1 |  |  | 2 |
| Dankassari | Tsabatankari | 521 |  |  | 1 |  |  |  |  |  |  |  | 1 |  |
| Dioundiou | Allakirey tribu | 389 |  |  | 1 |  |  |  |  | 1 |  |  |  |  |
| Dioundiou | Angoual Daoura | 485 |  |  | 1 |  |  |  |  | 1 |  |  |  |  |
| Dioundiou | Angoual Doka 1 | 911 |  |  | 1 |  |  |  |  | 1 |  |  |  |  |
| Dioundiou | Angoual Doka 2 | 442 |  |  | 1 |  |  |  |  | 1 |  |  |  |  |
| Dioundiou | Angoual Rey-rey | 576 |  |  | 1 |  |  |  |  | 1 |  |  |  |  |
| Dioundiou | Angoual Yaya | 334 |  |  | 1 |  |  |  |  | 1 |  |  |  |  |
| Dioundiou | Balifalo | 705 |  |  | 1 |  |  |  |  | 1 |  |  |  |  |
| Dioundiou | Daffan | 559 |  |  | 1 |  |  |  |  | 1 |  |  |  |  |
| Dioundiou | Dioundiou | 6054 | 1 |  |  | 1 |  |  | 1 |  |  |  |  |  |
| Dioundiou | Dioundou urbain | 6054 |  |  | 1 |  |  |  |  | 1 |  |  |  |  |
| Dioundiou | Doli | 268 |  |  | 1 |  |  |  |  | 1 |  |  |  |  |
| Dioundiou | Firore | 376 |  |  | 1 |  |  |  |  | 1 |  |  |  |  |
| Dioundiou | Garey Goussou tribu | 93 |  |  | 1 |  |  |  |  | 1 |  |  |  |  |
| Dioundiou | Goroun Malam | 241 |  |  | 1 |  |  |  |  | 1 |  |  |  |  |
| Dioundiou | Goroun Zangui | 591 |  |  | 1 |  |  |  |  | 1 |  |  |  |  |
| Dioundiou | Gueza Bissala | 897 |  |  | 1 |  |  |  |  | 1 |  |  |  |  |
| Dioundiou | Guigane | 441 |  |  | 1 |  |  |  |  | 1 |  |  |  |  |
| Dioundiou | Hamamara | 1130 |  |  | 1 |  |  |  |  | 1 |  |  |  |  |
| Dioundiou | Hamdallahi | 664 |  |  | 1 | 1 |  |  |  | 1 |  |  |  |  |
| Dioundiou | Hamdallaye (Hamdallahi) | 664 | 1 |  |  |  |  |  | 1 |  |  |  |  |  |
| Dioundiou | Hattara Zaki Oubandawaki | 109 |  |  | 1 |  |  |  |  | 1 |  |  |  |  |
| Dioundiou | Kalgon Balla | 394 |  |  | 1 |  |  |  |  | 1 |  |  |  |  |
| Dioundiou | Karki | 420 |  |  | 1 |  |  |  |  | 1 |  |  |  |  |
| Dioundiou | Komakaina | 1170 |  |  | 1 |  |  |  |  | 1 |  |  |  |  |
| Dioundiou | Koutoumouu | 3100 |  |  | 1 |  |  |  |  | 1 |  |  |  |  |
| Dioundiou | Mague tribu | 326 |  |  | 1 |  |  |  |  | 1 |  |  |  |  |
| Dioundiou | Makani | 539 |  |  | 1 |  |  |  |  | 1 |  |  |  |  |
| Dioundiou | Mamaya | 386 |  |  | 1 |  |  |  |  | 1 |  |  |  |  |
| Dioundiou | Mamaya tribu | 265 |  |  | 1 |  |  |  |  | 1 |  |  |  |  |
| Dioundiou | Matcheri | 842 |  |  | 1 |  |  |  |  | 1 |  |  |  |  |
| Dioundiou | Mourna Hadi | 281 |  |  | 1 |  |  |  |  | 1 |  |  |  |  |
| Dioundiou | Rouan Koka | 436 |  |  | 1 |  |  |  |  | 1 |  |  |  |  |
| Dioundiou | Takalafia | 1466 |  |  | 1 |  |  |  |  | 1 |  |  |  |  |
| Dioundiou | Toulounboulou | 706 |  |  | 1 |  |  |  |  | 1 |  |  |  |  |
| Dioundiou | Tounga Foga | 322 |  |  | 1 |  |  |  |  | 1 |  |  |  |  |
| Dioundiou | Zouzou tribu | 163 |  |  | 1 |  |  |  |  | 1 |  |  |  |  |
| Dogon Kiria | Balessa | 2921 | 1 |  |  |  |  |  |  | 1 |  |  |  |  |
| Dogon Kiria | Dogonkiria Kare |  | 1 |  |  |  |  |  |  | 1 |  |  |  |  |
| Dogon Kiria | Tounoun Dounka Dogon Gao | 437 |  |  | 1 |  |  |  |  |  |  |  | 1 |  |
| Dogondoutchi | Adoua | 510 | 1 |  |  |  |  |  |  |  | 1 |  |  |  |
| Dogondoutchi | Agadez (Agadez Oubandawaki Qt) | 1864 | 1 |  |  |  |  |  | 1 |  |  |  |  |  |
| Dogondoutchi | Dagmago (Damago Qt) | 3166 | 1 |  |  |  |  |  | 1 |  |  |  |  |  |
| Dogondoutchi | Doutchi | 31941 | 1 |  |  |  |  |  | 1 | 1 | 1 |  |  | 3 |
| Dogondoutchi | Gambara (Gombara) | 340 | 1 |  |  |  |  |  |  |  | 1 |  |  |  |
| Dogondoutchi | Kalanmota |  | 1 |  |  |  |  |  |  |  | 1 |  |  |  |
| Dogondoutchi | Kouka Bakoye | 1847 | 1 |  |  |  |  |  |  |  |  | 1 |  |  |
| Dogondoutchi | Liguido | 3690 | 1 |  |  |  |  |  |  |  |  | 1 |  |  |
| Dogondoutchi | Riji Tamna (Rigia Samna) | 2352 | 1 |  |  |  |  |  |  |  | 1 |  |  |  |
| Dogondoutchi | Tellam |  | 1 |  |  |  |  |  |  |  | 1 |  |  |  |
| Dogonkiria | Aboulala | 600 |  |  | 1 |  |  |  | 1 |  |  |  |  |  |
| Dogonkiria | Aboulala Bargoumawa | 481 |  |  | 1 |  |  |  |  | 1 | 1 | 1 |  | 3 |
| Dogonkiria | Akoira Peulh | 21 |  |  | 1 |  |  |  | 1 |  | 1 |  |  | 2 |
| Dogonkiria | Balessa | 2921 |  |  | 1 |  |  |  |  |  | 1 |  |  |  |
| Dogonkiria | Bougou | 1039 |  |  | 1 |  |  |  |  |  | 1 |  |  |  |
| Dogonkiria | Bougou Peulh | 162 |  |  | 1 |  |  |  |  |  | 1 |  |  |  |
| Dogonkiria | Ct Agoumbi A. Toudoun Jaka | 188 |  |  | 1 |  |  |  |  | 1 | 1 | 1 |  | 3 |
| Dogonkiria | Camp.t Aggoum Zoougoura | 184 |  |  | 1 |  |  |  |  |  |  | 1 |  |  |
| Dogonkiria | Campt Fakon Madobiya | 67 |  |  | 1 |  |  |  |  |  | 1 | 1 |  | 2 |
| Dogonkiria | Campt Sabongari | 164 |  |  | 1 |  |  |  |  |  | 1 |  |  |  |
| Dogonkiria | Campt T Toudou Djaka | 338 |  |  | 1 |  |  |  |  |  | 1 | 1 |  | 2 |
| Dogonkiria | Campt Zougoura | 71 |  |  | 1 |  |  |  |  |  | 1 |  |  |  |
| Dogonkiria | Dangnaye (Dan Yaye) | 438 |  |  | 1 |  |  |  |  |  | 1 | 1 |  | 2 |
| Dogonkiria | Dodoria | 1173 |  |  | 1 |  |  |  |  |  | 1 | 1 |  | 2 |
| Dogonkiria | Doga Aboulala | 253 |  |  | 1 |  | 1 |  | 1 | 1 | 1 | 1 |  | 5 |
| Dogonkiria | Dogonkiria | 3064 |  |  | 1 |  |  |  |  |  | 1 |  | 1 | 2 |
| Dogonkiria | Gachikaye | 582 |  |  | 1 |  |  |  |  |  | 1 | 1 |  | 2 |
| Dogonkiria | Godaye (Godey) | 630 |  |  | 1 |  |  |  | 1 |  | 1 | 1 |  | 3 |
| Dogonkiria | Godey | 630 |  |  | 1 |  | 1 |  |  | 1 |  |  |  | 2 |
| Dogonkiria | Illéla Akoira | 1043 |  |  | 1 |  | 1 |  |  |  | 1 |  | 1 | 3 |
| Dogonkiria | Intougai | 133 |  |  | 1 |  | 1 |  |  | 1 |  |  |  | 2 |
| Dogonkiria | Intougaye | 133 |  |  | 1 |  |  |  |  |  | 1 | 1 |  | 2 |
| Dogonkiria | Issa Kitchi | 4117 |  |  | 1 |  |  |  |  |  | 1 |  |  |  |
| Dogonkiria | Kaiwa Fako | 1681 |  |  | 1 |  |  |  |  |  | 1 |  |  |  |
| Dogonkiria | Kaiwa Ganwo | 811 |  |  | 1 |  |  |  |  |  | 1 |  |  |  |
| Dogonkiria | Kalaba | 627 |  |  | 1 |  |  |  |  |  | 1 |  |  |  |
| Dogonkiria | Kassari | 886 |  |  | 1 |  |  |  | 1 | 1 | 1 |  | 1 | 4 |
| Dogonkiria | Kawara | 689 |  |  | 1 |  |  |  |  |  | 1 |  |  |  |
| Dogonkiria | Kitchi | 2144 |  |  | 1 |  |  |  |  |  | 1 | 1 |  | 2 |
| Dogonkiria | Koumari (K et hameaux) | 1068 |  |  | 1 |  | 1 |  | 1 | 1 | 1 | 1 |  | 5 |
| Dogonkiria | Koutoumbou | 3386 |  |  | 1 |  | 1 |  |  |  |  |  |  |  |
| Dogonkiria | Maiguigé (Maiguize) | 511 |  |  | 1 |  | 1 |  |  |  | 1 |  |  | 2 |
| Dogonkiria | Maimakainé | 2144 |  |  | 1 |  | 1 |  |  | 1 |  |  |  | 2 |
| Dogonkiria | Makourdi | 849 |  |  | 1 |  | 1 |  |  |  | 1 | 1 |  | 3 |
| Dogonkiria | Marjak | 1286 |  |  | 1 |  | 1 |  |  | 1 | 1 | 1 |  | 4 |
| Dogonkiria | Soucoucoutane Peulh | 305 |  |  | 1 |  | 1 |  |  |  |  |  |  |  |
| Dogonkiria | Tambagani | 1756 |  |  | 1 |  |  |  |  |  | 1 |  | 1 | 2 |
| Dogonkiria | Toudoun Djaka (T. Jaka) | 1023 |  |  | 1 |  |  |  |  | 1 | 1 | 1 |  | 3 |
| Dogonkiria | Toudoun Fatake | 623 |  |  | 1 |  | 1 |  |  | 1 | 1 | 1 |  | 4 |
| Dogonkiria | Tounou Dounka (TD Dogon Gao) | 437 |  |  | 1 |  |  |  |  |  | 1 |  |  |  |
| Dogonkiria | Tsadoura Magorawa | 680 |  |  | 1 |  | 1 |  |  |  |  |  |  |  |
| Dogonkiria | Yelmi Ahamet | 722 |  |  | 1 |  | 1 |  |  |  | 1 | 1 |  | 3 |
| Dogonkiria | Yelmi Roumboukawa | 745 |  |  | 1 |  | 1 |  |  |  | 1 | 1 |  | 3 |
| Dogonkiria | Yilwa (Yelwa) | 463 |  |  | 1 |  | 1 |  |  |  | 1 |  | 1 | 3 |
| Dosso CU | Agali | 1833 |  |  | 1 |  |  |  |  | 1 |  |  |  |  |
| Dosso CU | Boukata Kouara | 315 |  |  | 1 |  |  |  |  |  |  | 1 |  |  |
| Dosso CU | Daytagui Niandou | 411 |  |  | 1 |  |  |  |  |  |  | 1 |  |  |
| Dosso CU | Fode Beri | 636 |  |  | 1 |  |  |  |  |  |  | 1 |  |  |
| Dosso CU | Kofadey | 649 |  |  | 1 |  |  |  |  | 1 |  |  |  |  |
| Dosso CU | Koure Kobadey | 882 |  |  | 1 |  |  |  |  |  | 1 | 1 |  | 2 |
| Dosso CU | Koure Maliki | 601 |  |  | 1 |  |  |  |  |  | 1 | 1 |  | 2 |
| Dosso CU | Koure Sakaou | 477 |  |  | 1 |  |  |  |  |  | 1 | 1 |  | 2 |
| Dosso CU | Koygorou | 2041 |  |  | 1 |  |  |  |  |  |  | 1 |  |  |
| Dosso CU | Niuiga | 1376 |  |  | 1 |  |  |  |  |  |  | 1 |  |  |
| Dosso CU | Takamagou | 603 |  |  | 1 |  |  |  |  |  |  | 1 |  |  |
| Dosso CU | Tchambanga | 1965 |  |  | 1 |  |  |  |  | 1 |  |  |  |  |
| Dosso CU | Zamodey | 656 |  |  | 1 |  |  |  |  | 1 |  |  |  |  |
| Doumega | Angoual Garka | 483 | 1 |  |  |  |  |  | 1 |  |  |  |  |  |
| Doumega | Birnin Falla | 2420 | 1 |  |  |  |  |  |  | 1 |  |  |  |  |
| Doumega | Boutana | 943 | 1 |  |  |  |  |  |  |  |  | 1 |  |  |
| Doumega | Djadjatou |  | 1 |  |  |  |  |  | 1 |  |  |  |  |  |
| Doumega | Doumega | 5080 | 1 |  |  |  |  |  | 1 | 1 |  |  | 1 | 3 |
| Doumega | Garanga |  | 1 |  |  |  |  |  | 1 |  |  |  |  |  |
| Doumega | Konawa | 563 | 1 |  |  |  |  |  | 1 | 1 |  |  |  | 2 |
| Doumega | Wassa Da Hatchi | 747 | 1 |  |  |  |  |  | 1 | 1 |  |  |  | 2 |
| Doumega | Zoumbou | 3751 | 1 |  |  |  |  |  |  |  |  | 1 |  |  |
| Douméga | Angoual Doutchi | 409 |  |  | 1 |  |  |  |  | 1 | 1 |  |  | 2 |
| Douméga | Angoual Garka | 483 |  |  | 1 |  | 1 |  | 1 |  |  |  |  | 2 |
| Douméga | Angoual Goube Falla | 1584 |  |  | 1 |  | 1 |  |  | 1 |  |  |  | 2 |
| Douméga | Angoual Hassada | 498 |  |  | 1 |  | 1 |  |  | 1 |  |  |  | 2 |
| Douméga | Angoual Toudou | 1142 |  |  | 1 |  |  |  |  | 1 |  |  |  |  |
| Douméga | Béchemi | 1082 |  |  | 1 |  |  |  |  |  |  | 1 |  |  |
| Douméga | Birni Falla | 2420 |  |  | 1 |  | 1 |  |  | 1 |  |  |  | 2 |
| Douméga | Birni Falla Peul | 311 |  |  | 1 |  | 1 |  |  | 1 |  |  |  | 2 |
| Douméga | Boutana | 943 |  |  | 1 |  | 1 |  |  | 1 |  | 1 |  | 3 |
| Douméga | Doumega | 6430 |  |  | 1 |  |  |  | 1 | 1 |  |  |  | 2 |
| Douméga | Douméga Peulh | 5080 |  |  | 1 |  |  |  |  |  | 1 |  |  |  |
| Douméga | Doungouzawa | 624 |  |  | 1 |  | 1 |  |  |  |  |  |  |  |
| Douméga | Guidadam | 769 |  |  | 1 |  |  |  |  |  | 1 |  |  |  |
| Douméga | Kelleli | 448 |  |  | 1 |  |  |  |  | 1 |  |  |  |  |
| Douméga | Konawa | 563 |  |  | 1 |  | 1 |  | 1 |  |  |  |  | 2 |
| Douméga | Mai Zabi | 665 |  |  | 1 | 1 | 1 |  |  |  |  |  |  |  |
| Douméga | Mai Zari | 665 |  |  | 1 |  |  |  |  | 1 |  | 1 |  | 2 |
| Douméga | Malabawa | 473 |  |  | 1 |  |  |  |  | 1 |  |  |  |  |
| Douméga | Tombo boya | 896 |  |  | 1 |  |  |  |  |  |  | 1 |  |  |
| Douméga | Tombo Tchiffa | 617 |  |  | 1 |  |  |  |  |  |  | 1 |  |  |
| Douméga | Toudawa | 436 |  |  | 1 |  |  |  |  | 1 |  |  |  |  |
| Douméga | Tsalle | 824 |  |  | 1 |  | 1 |  |  |  |  |  |  |  |
| Douméga | Wassada Hatchi | 747 |  |  | 1 |  |  |  | 1 |  |  |  |  |  |
| Douméga | Zariatou | 1599 |  |  | 1 |  | 1 |  | 1 |  |  |  |  | 2 |
| Douméga | Zoumbou | 3751 |  |  | 1 |  | 1 |  |  | 1 |  | 1 |  | 3 |
| Doutchi | Angoual Saoulo | 1196 |  |  | 1 |  |  |  | 1 |  |  |  | 1 | 2 |
| Doutchi | Argoum | 504 |  |  | 1 |  | 1 |  |  |  |  |  |  |  |
| Doutchi | Batamberi Mamoudou | 2102 |  |  | 1 |  | 1 |  |  |  |  | 1 |  | 2 |
| Doutchi | Dandagoum | 407 |  |  | 1 |  | 1 |  |  |  |  |  |  |  |
| Doutchi | Kalgo | 951 |  |  | 1 |  |  |  | 1 |  |  |  | 1 | 2 |
| Doutchi | Kelam | 840 |  |  | 1 |  |  |  |  |  |  | 1 |  |  |
| Doutchi | Kerketey | 382 |  |  | 1 |  | 1 |  |  |  |  | 1 |  | 2 |
| Doutchi | Koukabakoye | 1847 |  |  | 1 |  | 1 |  |  |  |  |  |  |  |
| Doutchi | Kourya | 1284 |  |  | 1 |  | 1 |  |  |  |  |  |  |  |
| Doutchi | Liguido | 3690 |  |  | 1 |  | 1 |  |  |  |  |  |  |  |
| Doutchi | Rigia Samna | 2352 |  |  | 1 |  | 1 |  |  |  |  |  | 1 | 2 |
| Doutchi | Tantchia (QT) | 3006 |  |  | 1 |  |  |  | 1 |  |  |  |  |  |
| Doutchi | Togone | 3537 |  |  | 1 |  |  |  | 1 |  |  |  | 1 | 2 |
| Doutchi | Toulou Kaina | 547 |  |  | 1 |  | 1 |  |  |  |  | 1 |  | 2 |
| Fabidji | Banbahi Alphaga Koira | 41 | 1 |  |  |  |  |  | 1 |  |  |  |  |  |
| Fabidji | Bassi Djerma | 1155 |  |  | 1 |  |  |  |  |  | 1 |  | 1 | 2 |
| Fabidji | Bassi Peulh | 775 |  |  | 1 |  |  |  |  |  | 1 |  | 1 | 2 |
| Fabidji | Bierniel Alfari | 305 |  |  | 1 |  |  |  |  |  |  | 1 | 1 | 2 |
| Fabidji | Bilingol Peulh | 307 |  |  | 1 |  |  |  |  |  | 1 |  | 1 | 2 |
| Fabidji | Bilongol Zarma | 405 |  |  | 1 |  |  |  |  |  | 1 |  | 1 | 2 |
| Fabidji | Birniel Ibrahim | 1661 |  |  | 1 |  |  |  |  |  | 1 | 1 | 1 | 3 |
| Fabidji | Bombohi | 368 | 1 |  |  | 1 |  |  | 1 |  |  |  |  |  |
| Fabidji | Bombohi | 368 |  |  | 1 |  |  |  |  |  | 1 |  |  |  |
| Fabidji | Bombohi Ganda | 218 | 1 |  |  |  |  |  | 1 |  |  |  |  |  |
| Fabidji | Deleigui Hassan |  | 1 |  |  |  |  |  | 1 |  |  |  |  |  |
| Fabidji | Deytagui Amadou | 1115 |  |  | 1 |  |  |  |  |  | 1 |  |  |  |
| Fabidji | Fabidji Djerma | 3989 | 1 |  |  |  |  |  | 1 |  |  |  |  |  |
| Fabidji | Fabidji Haoussa | 775 |  |  | 1 |  |  |  |  |  |  | 1 | 1 | 2 |
| Fabidji | Fabidji zarma | 629 |  |  | 1 |  |  |  |  |  |  | 1 |  |  |
| Fabidji | Fandou Bali Bali | 1431 |  |  | 1 |  |  |  |  |  | 1 |  | 1 | 2 |
| Fabidji | Fataloulou | 219 |  |  | 1 |  |  |  |  |  |  | 1 | 1 | 2 |
| Fabidji | Firiniel Alfari | 339 |  |  | 1 |  |  |  |  |  | 1 |  |  |  |
| Fabidji | Goberi Gnamakaley Peulh | 626 |  |  | 1 |  |  |  |  |  | 1 |  | 1 | 2 |
| Fabidji | Goberi Gnamakaley Zarma | 324 |  |  | 1 | 1 |  |  |  |  | 1 |  | 1 | 2 |
| Fabidji | Goberi Gnamangale Zarma | 324 | 1 |  |  |  |  |  | 1 |  |  |  |  |  |
| Fabidji | Goberi Gobey | 1040 |  |  | 1 | 1 |  |  |  |  | 1 |  | 1 | 2 |
| Fabidji | Goberi Goubey | 1040 | 1 |  |  |  |  |  | 1 |  |  |  |  |  |
| Fabidji | Habiri | 629 |  |  | 1 |  |  |  |  |  | 1 |  | 1 | 2 |
| Fabidji | Irah | 1787 |  |  | 1 |  |  |  |  |  | 1 |  | 1 | 2 |
| Fabidji | Kargui Bangou | 18 |  |  | 1 |  |  |  |  |  | 1 |  | 1 | 2 |
| Fabidji | Oumou Ize Koira | 129 |  |  | 1 |  |  |  |  |  | 1 |  |  |  |
| Fabidji | Rogi Peulh | 1255 |  |  | 1 |  |  |  |  |  | 1 |  |  |  |
| Fabidji | Rogi Zarma | 177 |  |  | 1 |  |  |  |  |  | 1 |  |  |  |
| Fabidji | Sina Lesso (Sira Lelesso) | 235 | 1 |  |  |  |  |  | 1 |  |  |  |  |  |
| Fabidji | Sinakatoune | 475 | 1 |  |  | 1 |  |  | 1 |  |  |  |  |  |
| Fabidji | Sirakatou | 475 |  |  | 1 |  |  |  |  |  | 1 |  |  |  |
| Fabidji | Souda Haini Baba Koira | 247 |  |  | 1 |  |  |  |  |  | 1 |  |  |  |
| Fabidji | Tambo Hassane | 495 |  |  | 1 |  |  |  |  |  | 1 |  |  |  |
| Fabidji | Tchancargui Zarma | 1251 |  |  | 1 |  |  |  |  |  | 1 |  |  |  |
| Fabidji | Tchankardji | 321 | 1 |  |  | 1 |  |  | 1 |  |  |  |  |  |
| Fabidji | Tchankargui | 321 |  |  | 1 |  |  |  |  |  |  | 1 |  |  |
| Fabidji | Tihoré | 684 |  |  | 1 |  |  |  |  |  | 1 |  | 1 | 2 |
| Fabidji | Tombo Hassane | 495 | 1 |  |  | 1 |  |  | 1 |  |  |  |  |  |
| Fabidji | Tombo Hassane | 495 |  |  | 1 |  |  |  |  |  |  |  | 1 |  |
| Fabidji | Tondo | 1397 | 1 |  |  | 1 |  |  | 1 |  |  |  |  |  |
| Fabidji | Tondo | 1397 |  |  | 1 |  |  |  |  |  | 1 |  |  |  |
| Fabidji | Tormo Dioffo | 219 |  |  | 1 |  |  |  |  |  | 1 |  |  |  |
| Fabidji | Torombi | 2423 | 1 |  |  | 1 |  |  | 1 |  |  |  |  |  |
| Fabidji | Torombi | 2423 |  |  | 1 |  |  |  |  |  | 1 | 1 | 1 | 3 |
| Fabidji | Toudou | 2022 |  |  | 1 |  |  |  |  |  |  |  | 1 |  |
| Fabidji | Trombi Dioffo | 1155 |  |  | 1 |  |  |  |  |  |  | 1 |  |  |
| Fakara | Gobriko Banizoumbou | 1338 |  |  | 1 |  |  |  |  |  | 1 | 1 |  | 2 |
| Fakara | Gombewa | 1244 |  |  | 1 |  |  |  |  |  | 1 | 1 | 1 | 3 |
| Fakara | Gombriko Zanguina | 811 |  |  | 1 |  |  |  |  |  | 1 |  | 1 | 2 |
| Fakara | Guidal | 1804 |  |  | 1 |  |  |  |  |  |  | 1 |  |  |
| Fakara | Kobodey | 1804 |  |  | 1 |  |  |  |  |  | 1 |  | 1 | 2 |
| Fakara | Koddo | 1365 |  |  | 1 |  |  |  |  |  | 1 |  | 1 | 2 |
| Fakara | Tanné Kaina | 949 |  |  | 1 |  |  |  |  |  | 1 |  |  |  |
| Falmey | Allouguel | 374 |  |  | 1 |  |  |  |  | 1 |  |  |  |  |
| Falmey | Banigoungou | 3628 | 1 |  |  | 1 |  |  | 1 |  | 1 |  |  | 2 |
| Falmey | Banigoungou | 3698 |  |  | 1 |  |  |  | 1 |  |  |  |  |  |
| Falmey | Belande Djerma | 2791 |  |  | 1 |  |  |  | 1 |  |  |  |  |  |
| Falmey | Belande Djerma Kaina | 1031 |  |  | 1 |  |  |  | 1 |  |  |  |  |  |
| Falmey | Belande Silenkey | 554 |  |  | 1 |  |  |  | 1 |  |  |  |  |  |
| Falmey | Belindé |  | 1 |  |  |  |  |  |  |  | 1 |  |  |  |
| Falmey | Bomboji (Bombodji) | 400 |  |  | 1 |  |  |  |  | 1 |  |  |  |  |
| Falmey | Bouloumgaye | 1193 |  |  | 1 |  |  |  |  | 1 |  |  |  |  |
| Falmey | Boumba | 1774 |  | 1 |  | 1 |  |  | 1 |  |  |  |  |  |
| Falmey | Boumba | 1774 |  |  | 1 |  |  |  |  | 1 |  |  |  |  |
| Falmey | Bourdouga (Bourdounga) | 586 |  |  | 1 |  |  |  | 1 | 1 |  |  |  | 2 |
| Falmey | Boybangou Peulh | 266 |  |  | 1 |  |  |  | 1 |  |  |  |  |  |
| Falmey | Falmey | 6394 | 1 |  |  |  |  |  | 1 |  |  |  |  |  |
| Falmey | Fono Birgui | 428 |  |  | 1 |  |  |  |  | 1 |  |  |  |  |
| Falmey | Gongueye | 1558 |  |  | 1 |  |  |  |  | 1 |  |  |  |  |
| Falmey | Kaboboye | 922 |  |  | 1 |  |  |  |  | 1 |  |  |  |  |
| Falmey | Kotaki | 3221 |  |  | 1 |  |  |  |  | 1 |  |  |  |  |
| Falmey | Kouassi Peulh et Haoussa | 830 |  | 1 |  |  |  |  | 1 |  |  |  |  |  |
| Falmey | Malam Koira | 473 |  |  | 1 |  |  |  |  | 1 |  |  |  |  |
| Falmey | Niamodey (Nianodey) | 1418 |  |  | 1 |  |  |  | 1 | 1 |  |  |  | 2 |
| Falmey | Saboula | 3476 | 1 |  |  | 1 |  |  | 1 |  |  |  |  |  |
| Falmey | Saboula | 3476 |  |  | 1 |  |  |  |  | 1 |  |  |  |  |
| Falmey | Tchantchoga Peulh | 574 |  |  | 1 |  |  |  | 1 |  |  |  |  |  |
| Falmey | Tchantioga Zarma | 677 |  |  | 1 |  |  |  | 1 |  |  |  |  |  |
| Falmey | Tonkassarey Peul | 436 |  |  | 1 |  |  |  | 1 | 1 |  |  |  | 2 |
| Falmey | Tonkassarey Zarma | 509 |  |  | 1 |  |  |  | 1 | 1 |  |  |  | 2 |
| Falwel | Aboudia (Abouja) | 370 | 1 |  |  | 1 |  |  |  |  |  |  | 1 |  |
| Falwel | Abouja | 370 |  |  | 1 |  |  |  |  |  |  | 1 | 1 | 2 |
| Falwel | Ayo Koira | 2174 |  |  | 1 | 1 |  |  |  | 1 |  | 1 | 1 | 3 |
| Falwel | Ayo Kouara (Ayo Koira) | 2174 | 1 |  |  |  |  |  |  |  | 1 |  |  |  |
| Falwel | Ban Zoumbo (Banizoumbou) | 579 | 1 |  |  | 1 |  |  |  |  |  |  | 1 |  |
| Falwel | Bani Zoumbou | 72 |  |  | 1 |  |  |  |  |  |  | 1 | 1 | 2 |
| Falwel | Banizoumbou Samari Dey | 579 |  |  | 1 |  |  |  |  |  |  | 1 |  |  |
| Falwel | Batamberi | 1731 |  |  | 1 |  |  |  |  |  | 1 |  |  |  |
| Falwel | Béla Béri Koara | 416 |  |  | 1 |  |  |  |  |  | 1 |  |  |  |
| Falwel | Darrré koara | 425 |  |  | 1 |  |  |  |  |  |  | 1 |  |  |
| Falwel | Dey Tegui Moussa | 586 | 1 |  |  | 1 |  |  |  |  | 1 |  |  |  |
| Falwel | Dey Tégui Moussa | 586 |  |  | 1 |  |  |  |  | 1 | 1 | 1 | 1 | 4 |
| Falwel | Deytégui Samssou | 562 |  |  | 1 |  |  |  |  | 1 |  | 1 | 1 | 3 |
| Falwel | Deytegui Madé | 921 |  |  | 1 |  |  |  |  | 1 |  |  | 1 | 2 |
| Falwel | Deytégui Yamba | 592 |  |  | 1 |  |  |  |  |  |  | 1 |  |  |
| Falwel | Djaga dey | 194 |  |  | 1 |  |  |  |  |  |  | 1 |  |  |
| Falwel | Doundou Gorou | 318 |  |  | 1 |  |  |  |  |  |  |  | 1 |  |
| Falwel | Falwel | 5069 |  |  | 1 |  |  |  |  | 1 | 1 |  | 1 | 3 |
| Falwel | Fantouyan | 35 |  |  | 1 |  |  |  |  |  | 1 | 1 | 1 | 3 |
| Falwel | Gardié | 1210 |  |  | 1 |  |  |  |  | 1 | 1 |  |  | 2 |
| Falwel | Goroubéri Yérima | 1387 |  |  | 1 |  |  |  |  |  | 1 |  | 1 | 2 |
| Falwel | Goubey Dey | 896 |  |  | 1 |  |  |  |  | 1 |  | 1 | 1 | 3 |
| Falwel | Goubey Dey Sido | 455 |  |  | 1 |  |  |  |  |  |  | 1 |  |  |
| Falwel | Goulmé | 451 |  |  | 1 |  |  |  |  |  |  | 1 |  |  |
| Falwel | Gounno koara | 684 |  |  | 1 |  |  |  |  |  |  | 1 |  |  |
| Falwel | Hamdallahi | 779 | 1 |  |  | 1 |  |  |  |  | 1 |  |  |  |
| Falwel | Hamdallaye | 779 |  |  | 1 |  |  |  |  | 1 |  | 1 |  | 2 |
| Falwel | Héra Koara | 677 |  |  | 1 |  |  |  |  |  |  | 1 |  |  |
| Falwel | Hintchinkoye Koira | 579 |  |  | 1 |  |  |  |  | 1 |  |  |  |  |
| Falwel | Kaboé Koira (Kaboy Koara) | 1121 |  |  | 1 |  |  |  |  | 1 | 1 |  |  | 2 |
| Falwel | Ko Koukou | 673 |  |  | 1 |  |  |  |  |  | 1 |  |  |  |
| Falwel | Koba Koara | 879 |  |  | 1 |  |  |  |  |  | 1 |  |  |  |
| Falwel | Kobi Madé | 402 |  |  | 1 |  |  |  |  |  | 1 |  |  |  |
| Falwel | Kodey | 985 |  |  | 1 |  |  |  |  |  | 1 |  |  |  |
| Falwel | Kofitti | 531 |  |  | 1 |  |  |  |  |  |  | 1 |  |  |
| Falwel | Kogou | 1401 |  |  | 1 |  |  |  |  |  |  | 1 |  |  |
| Falwel | Kossey Gorou | 384 |  |  | 1 |  |  |  |  |  | 1 |  | 1 | 2 |
| Falwel | Koussa Koara | 448 |  |  | 1 |  |  |  |  |  |  | 1 |  |  |
| Falwel | Koykona Koira | 922 |  |  | 1 |  |  |  |  | 1 | 1 |  |  | 2 |
| Falwel | Ladan Dey | 418 |  |  | 1 | 1 |  |  |  |  |  | 1 |  |  |
| Falwel | Ladan Dey | 418 | 1 |  |  |  |  |  |  |  | 1 |  |  |  |
| Falwel | Laou goumbi | 520 |  |  | 1 |  |  |  |  |  |  | 1 | 1 | 2 |
| Falwel | Madina | 404 |  |  | 1 |  |  |  |  |  | 1 |  | 1 | 2 |
| Falwel | Maitchigo | 325 |  |  | 1 |  |  |  |  |  |  |  | 1 |  |
| Falwel | Mallam Koira | 1539 |  |  | 1 |  |  |  |  |  |  |  | 1 |  |
| Falwel | Maourey dey | 68 |  |  | 1 |  |  |  |  | 1 |  | 1 | 1 | 3 |
| Falwel | Maourey Dey Gombo Gandé | 187 |  |  | 1 |  |  |  |  |  |  | 1 |  |  |
| Falwel | Marafa Kouara | 692 |  |  | 1 |  |  |  |  | 1 | 1 |  |  | 2 |
| Falwel | Mbala Daouda | 440 |  |  | 1 |  |  |  |  |  | 1 |  | 1 | 2 |
| Falwel | Mbala Djibrilla | 566 |  |  | 1 |  |  |  |  |  | 1 |  | 1 | 2 |
| Falwel | Moussadey Kaina | 1443 |  |  | 1 |  |  |  |  |  |  | 1 |  |  |
| Falwel | Sambo Koara | 310 |  |  | 1 |  |  |  |  |  |  | 1 |  |  |
| Falwel | Sarkin Noma Koira | 600 |  |  | 1 |  |  |  |  |  |  |  | 1 |  |
| Falwel | Sarkin Yara Koara | 1294 |  |  | 1 |  |  |  |  |  | 1 |  | 1 | 2 |
| Falwel | Soudjey Dey Bani Kane | 182 |  |  | 1 |  |  |  |  |  |  | 1 |  |  |
| Falwel | Tegoize Koira | 307 |  |  | 1 |  |  |  |  | 1 |  |  |  |  |
| Falwel | Tegoize Koira Zeno | 555 |  |  | 1 |  |  |  |  | 1 |  |  |  |  |
| Falwel | Tolo Tombo (Tollo Tombo) | 141 | 1 |  |  |  |  |  |  |  | 1 |  |  |  |
| Falwel | Toullou Maimassa | 2451 |  |  | 1 | 1 |  |  |  |  | 1 |  | 1 | 2 |
| Falwel | Toulou Malmassa | 2451 | 1 |  |  |  |  |  |  |  |  |  | 1 |  |
| Falwel | Wadata | 729 |  |  | 1 |  |  |  |  |  |  | 1 |  |  |
| Falwel | Zabia Koara | 1287 |  |  | 1 |  |  |  |  |  |  | 1 |  |  |
| Falwel | Zozo Tombo Harouna | 1051 |  |  | 1 |  |  |  |  | 1 | 1 | 1 | 1 | 4 |
| Falwel | Zozo Tombo Koda | 581 |  |  | 1 |  |  |  |  |  | 1 |  | 1 | 2 |
| Farey | Babba Koira | 154 |  |  | 1 |  | 1 |  |  |  |  |  |  |  |
| Farey | Barazé Gourou | 1114 |  |  | 1 |  | 1 |  |  |  |  |  |  |  |
| Farey | Bodinga | 519 |  |  | 1 |  | 1 |  |  |  |  |  |  |  |
| Farey | Boukagourou | 848 |  |  | 1 |  | 1 |  |  |  |  |  |  |  |
| Farey | Boundoki | 720 |  |  | 1 |  | 1 |  |  |  |  |  |  |  |
| Farey | Dédé Koara | 92 |  |  | 1 |  | 1 |  |  |  |  |  | 1 | 2 |
| Farey | Farey Kaina | 677 |  |  | 1 |  |  |  |  |  |  |  | 1 |  |
| Farey | Farrey | 1209 |  |  | 1 |  | 1 |  |  |  |  |  | 1 | 2 |
| Farey | Garbey Tombo | 659 |  |  | 1 |  |  | 1 |  |  |  |  |  |  |
| Farey | Gonga Karimou | 271 |  |  | 1 |  | 1 |  |  |  |  |  | 1 | 2 |
| Farey | Guimba Tombo | 560 |  |  | 1 |  |  | 1 |  |  |  |  |  |  |
| Farey | Hainikoye Koira | 424 |  |  | 1 |  | 1 |  |  |  |  |  |  |  |
| Farey | Kaffi | 1809 |  |  | 1 |  | 1 |  |  |  |  |  |  |  |
| Farey | Koassey | 1266 |  |  | 1 |  | 1 |  |  |  |  |  |  |  |
| Farey | Libo Tegui | 850 |  |  | 1 |  | 1 |  |  |  |  |  | 1 | 2 |
| Farey | Libo Zeno | 421 |  |  | 1 |  | 1 |  |  |  |  |  | 1 | 2 |
| Farey | Maureydey | 1061 |  |  | 1 |  |  | 1 |  |  |  |  |  |  |
| Farey | Mayaki Koara | 498 |  |  | 1 |  |  | 1 |  |  |  |  |  |  |
| Farey | Nassarawa (N. Tegui) | 448 |  |  | 1 |  |  | 1 |  |  |  |  |  |  |
| Farey | Talibi Roufaye (T. Lourdaye) | 325 |  |  | 1 |  |  | 1 |  |  |  |  |  |  |
| Garankedey | Bani Kane Bomberi | 286 |  |  | 1 |  | 1 |  |  |  |  |  |  |  |
| Garankedey | Banizoumbou Hama | 490 |  |  | 1 |  |  |  |  |  | 1 | 1 |  | 2 |
| Garankedey | Bankadey | 513 |  |  | 1 |  | 1 | 1 |  | 1 | 1 | 1 |  | 5 |
| Garankedey | Barma | 811 |  |  | 1 |  |  |  |  | 1 | 1 | 1 |  | 3 |
| Garankedey | Boulkoutou | 974 |  |  | 1 |  | 1 | 1 |  |  |  |  |  | 2 |
| Garankedey | Darey Karimou | 788 |  |  | 1 |  |  | 1 |  |  |  |  |  |  |
| Garankedey | Deytagui Attili | 1848 |  |  | 1 |  | 1 |  |  |  | 1 | 1 |  | 3 |
| Garankedey | Deytagui Hassane | 265 |  |  | 1 |  |  |  |  |  |  | 1 |  |  |
| Garankedey | Deytagui Noma | 745 |  |  | 1 |  |  | 1 |  |  | 1 | 1 |  | 3 |
| Garankedey | Deytagui Yarou | 663 |  |  | 1 |  |  | 1 |  |  |  | 1 |  | 1 |
| Garankedey | Deytegui Attili | 1848 | 1 |  |  |  |  |  |  | 1 |  |  |  |  |
| Garankedey | Forcey | 472 |  |  | 1 |  |  |  |  | 1 | 1 | 1 |  | 3 |
| Garankedey | Gamonzon Zamey Do | 845 |  |  | 1 |  | 1 |  |  |  |  |  |  |  |
| Garankedey | Gandaberi Koira | 1091 |  |  | 1 |  | 1 |  |  |  | 1 | 1 |  | 3 |
| Garankedey | Garankédey | 3147 |  |  | 1 |  | 1 |  |  |  |  | 1 |  | 2 |
| Garankedey | Gongadeybéri | 1033 |  |  | 1 |  |  | 1 |  | 1 | 1 | 1 |  | 4 |
| Garankedey | Gongatarey | 1622 |  |  | 1 |  | 1 |  |  |  |  |  |  |  |
| Garankedey | Goudel | 968 |  |  | 1 |  |  |  |  |  | 1 | 1 |  | 2 |
| Garankedey | Guéssé béri | 2032 |  |  | 1 |  | 1 |  |  | 1 |  | 1 |  | 3 |
| Garankedey | Guéssé kaina | 482 |  |  | 1 |  | 1 |  |  | 1 |  | 1 |  | 3 |
| Garankedey | Kayan | 2581 |  |  | 1 |  |  | 1 |  |  | 1 | 1 |  | 3 |
| Garankedey | Kotombo | 1465 | 1 |  |  | 1 |  |  |  | 1 |  |  |  |  |
| Garankedey | Kotombo | 1465 |  |  | 1 |  | 1 |  |  |  |  | 1 |  | 2 |
| Garankedey | Sourgou hilli | 1590 |  |  | 1 |  |  |  |  |  |  | 1 |  |  |
| Garankedey | Tombo Béri | 1442 |  |  | 1 |  |  | 1 |  |  | 1 | 1 |  | 3 |
| Gaya | Bai Tounga |  | 1 |  |  |  |  |  |  |  | 1 |  |  |  |
| Gaya | Baye Tounga | 103 | 1 |  |  |  |  |  | 1 |  |  |  |  |  |
| Gaya | Dendi Kourey |  | 1 |  |  |  |  |  |  |  |  |  | 1 |  |
| Gaya | Foo | 792 | 1 |  |  |  |  |  | 1 |  | 1 |  | 1 | 3 |
| Gaya | Gatta Tounga (Gata Tounga) | 111 |  | 1 |  |  |  |  |  |  |  |  | 1 |  |
| Gaya | Gaya Plateau II |  | 1 |  |  |  |  |  |  |  |  |  | 1 |  |
| Gaya | Kessa | 800 |  |  | 1 | 1 |  |  |  | 1 |  |  |  |  |
| Gaya | Kiassa (Kiessa) | 800 |  | 1 |  |  |  |  |  |  |  |  | 1 |  |
| Gaya | Kobassi | 76 |  | 1 |  |  |  |  | 1 |  |  |  | 1 | 2 |
| Gaya | Koira Tegui I | 92 | 1 |  |  |  |  |  |  |  |  |  | 1 |  |
| Gaya | Koira Tegui II |  | 1 |  |  |  |  |  |  |  |  |  | 1 |  |
| Gaya | Koira Tegui III |  | 1 |  |  |  |  |  |  |  |  |  | 1 |  |
| Gaya | Koira Tegui III suite |  | 1 |  |  |  |  |  |  |  |  |  | 1 |  |
| Gaya | Kombo | 89 |  | 1 |  |  |  |  | 1 |  | 1 |  | 1 | 3 |
| Gaya | Kotcha | 652 |  | 1 |  | 1 |  |  | 1 |  | 1 |  |  | 2 |
| Gaya | Kotcha | 652 |  |  | 1 |  |  |  |  | 1 |  |  |  |  |
| Gaya | Sakabatoum |  | 1 |  |  |  |  |  |  |  |  |  | 1 |  |
| Gaya | Sakondji Birni | 467 |  |  | 1 |  |  |  |  | 1 |  |  |  |  |
| Gaya | Sandi Tuonga | 134 |  | 1 |  |  |  |  |  |  |  |  | 1 |  |
| Gaya | Sokondji Birni (Sakondji) | 467 | 1 |  |  |  |  |  |  |  | 1 |  |  |  |
| Gaya | Tara | 4989 |  | 1 |  | 1 |  |  | 1 |  | 1 |  | 1 | 3 |
| Gaya | Tara | 4989 |  |  | 1 |  |  |  |  | 1 |  |  |  |  |
| Gaya | Tombo Beri | 725 |  |  | 1 |  |  |  |  | 1 |  |  |  |  |
| Gaya | Tondika | 669 |  | 1 |  | 1 |  |  | 1 |  |  |  |  |  |
| Gaya | Tondika | 669 |  |  | 1 |  |  |  |  | 1 |  |  |  |  |
| Gaya | Tounga Maihoda (T. Maikada) | 134 |  | 1 |  |  |  |  | 1 |  |  |  |  |  |
| Gaya | Tounga Sandi |  | 1 |  |  |  |  |  | 1 |  |  |  |  |  |
| Gaya | Zongo |  | 1 |  |  |  |  |  |  |  |  |  | 1 |  |
| Gollé | Bangou Kirey | 662 |  |  | 1 |  |  |  |  |  | 1 | 1 |  | 2 |
| Gollé | Banizoumbou Rambi | 978 | 1 |  |  |  |  |  |  | 1 |  |  |  |  |
| Gollé | Damari | 492 |  |  | 1 |  |  |  |  |  |  | 1 |  |  |
| Gollé | Gollé | 1084 |  |  | 1 |  |  |  |  |  | 1 |  |  |  |
| Gollé | Gomboro | 674 |  |  | 1 |  |  |  |  |  | 1 | 1 |  | 2 |
| Gollé | Gorou Yéno | 1477 |  |  | 1 |  |  |  |  |  | 1 |  |  |  |
| Gollé | Hambera |  | 1 |  |  |  |  |  |  |  |  | 1 |  |  |
| Gollé | Nabani Kouara | 166 |  |  | 1 |  |  |  |  |  | 1 |  |  |  |
| Gollé | Souley garou | 314 |  |  | 1 |  |  |  |  |  |  | 1 |  |  |
| Gollé | Souley Kouara (S. Garou K.) | 328 | 1 |  |  |  |  |  |  |  |  | 1 |  |  |
| Gollé | Tadékoara | 314 |  |  | 1 |  |  |  |  |  |  | 1 |  |  |
| Gollé | Tiaraberi (Kiara Beri) | 1126 | 1 |  |  |  |  |  |  | 1 |  |  |  |  |
| Gollé | Tiarno (Kiara-No) (Tcharno) | 615 | 1 |  |  |  |  |  |  | 1 |  |  |  |  |
| Gollé | Tombokaïna | 708 |  |  | 1 |  |  |  |  |  | 1 | 1 |  | 2 |
| Gollé | Yambare | 1988 | 1 |  |  | 1 |  |  |  | 1 |  |  |  |  |
| Gollé | Yambare | 1988 |  |  | 1 |  |  |  |  |  | 1 |  |  |  |
| Gorou Bankassam | Bakodey | 997 |  |  | 1 |  | 1 |  |  |  |  |  |  |  |
| Gorou Bankassam | Barguiko Beri | 1380 |  |  | 1 |  | 1 |  |  |  |  |  |  |  |
| Gorou Bankassam | Bondiolo | 485 |  |  | 1 |  |  |  |  | 1 | 1 |  |  | 2 |
| Gorou Bankassam | Djakoley | 466 |  |  | 1 |  |  |  |  | 1 |  |  | 1 | 2 |
| Gorou Bankassam | Gafiadey | 1618 |  |  | 1 |  | 1 |  |  | 1 | 1 | 1 |  | 4 |
| Gorou Bankassam | Gatabangou | 374 |  |  | 1 |  |  |  |  | 1 | 1 | 1 |  | 3 |
| Gorou Bankassam | Gorou Bankassam | 2442 |  |  | 1 |  | 1 |  |  |  |  |  |  |  |
| Gorou Bankassam | Kodourgnedey | 735 |  |  | 1 |  |  |  |  |  |  |  | 1 |  |
| Gorou Bankassam | Kombey | 334 |  |  | 1 |  |  |  |  | 1 |  |  | 1 | 2 |
| Gorou Bankassam | Kouloumbou | 358 |  |  | 1 |  |  |  |  | 1 | 1 | 1 |  | 3 |
| Gorou Bankassam | Koumbokoydey | 235 |  |  | 1 |  |  |  |  |  | 1 |  |  |  |
| Gorou Bankassam | Kountchétarey Hama | 927 |  |  | 1 |  |  |  |  |  | 1 |  | 1 | 2 |
| Gorou Bankassam | Kountchétarey Moussa | 1398 |  |  | 1 |  |  |  |  |  | 1 |  |  |  |
| Gorou Bankassam | Narey Alpha Bano | 853 |  |  | 1 |  |  |  |  |  | 1 |  |  |  |
| Gorou Bankassam | Narey Zangui Neze Dey | 354 |  |  | 1 |  |  |  |  |  |  |  | 1 |  |
| Gorou Bankassam | Nikki Kouara Tegui | 197 |  |  | 1 |  | 1 |  |  |  |  |  |  |  |
| Gorou Bankassam | Nima | 141 |  |  | 1 |  |  |  |  |  |  |  | 1 |  |
| Gorou Bankassam | Sawara Kaoua | 302 |  |  | 1 |  |  |  |  |  |  |  | 1 |  |
| Gorou Bankassam | Sirfidey | 596 |  |  | 1 |  |  |  |  |  |  |  | 1 |  |
| Gorou Bankassam | Sorko Banikan | 745 |  |  | 1 |  |  |  |  |  |  |  | 1 |  |
| Gorou Bankassam | Sorko Beri | 882 |  |  | 1 |  |  |  |  |  |  |  | 1 |  |
| Gorou Bankassam | Tarey Tombo | 988 |  |  | 1 |  | 1 |  |  |  |  |  |  |  |
| Gorou Bankassam | Tinne Dendi | 644 |  |  | 1 |  | 1 |  |  |  |  |  |  |  |
| Gorou Bankassam | Torso | 711 |  |  | 1 |  | 1 |  |  | 1 | 1 | 1 |  | 4 |
| Gorou Bankassam | Wonkoy Dey | 262 |  |  | 1 |  |  |  |  | 1 | 1 |  |  | 2 |
| Gorou Bankassam | Yamoussa koira | 653 |  |  | 1 |  |  |  |  | 1 | 1 | 1 | 1 | 4 |
| Gorou Bankassam | Yarou Koira | 1027 |  |  | 1 |  | 1 |  |  |  | 1 |  |  | 2 |
| Guechemé | Angoual Bozari = Illéla | 1327 |  |  | 1 |  |  | 1 |  | 1 |  | 1 |  | 3 |
| Guechemé | Heredamtché | 866 |  |  | 1 |  |  |  |  |  |  | 1 |  |  |
| Guechemé | Katarma | 126 |  |  | 1 |  |  |  |  |  |  | 1 |  |  |
| Guechemé | Angoual Bozari | 1327 | 1 |  |  |  |  |  |  |  | 1 |  |  |  |
| Guechemé | Angoual Chekaraou | 1440 | 1 |  |  | 1 |  |  | 1 |  |  |  |  |  |
| Guechemé | Angoual Chekaraou | 1440 |  |  | 1 |  |  | 1 |  | 1 |  |  |  | 2 |
| Guechemé | Angoual Kade (A. Kedey) | 599 |  |  | 1 |  |  | 1 |  | 1 |  |  |  | 2 |
| Guechemé | Angoual Maba | 1176 | 1 |  |  | 1 |  |  |  | 1 |  |  |  |  |
| Guechemé | Angoual Maba | 1176 |  |  | 1 |  |  |  |  | 1 |  |  |  |  |
| Guechemé | Angoual Marafa | 961 |  |  | 1 |  |  | 1 |  |  |  |  |  |  |
| Guechemé | Angouaz Magori |  | 1 |  |  |  |  |  |  |  |  | 1 |  |  |
| Guechemé | Bagawa |  | 1 |  |  |  |  |  |  |  | 1 |  |  |  |
| Guechemé | Ballam | 192 |  |  | 1 |  |  | 1 |  |  |  |  |  |  |
| Guechemé | Ballam Peulh | 237 |  |  | 1 |  |  |  |  | 1 |  |  |  |  |
| Guechemé | Ballama (Maiyaki / Chiphau) | 796 |  |  | 1 |  |  |  |  | 1 | 1 |  |  | 2 |
| Guechemé | Bawada | 891 | 1 |  |  |  |  |  |  |  | 1 |  |  |  |
| Guechemé | Bawada Indayya | 1356 |  |  | 1 |  |  |  |  | 1 |  | 1 |  | 2 |
| Guechemé | Bayawa Guéchémé | 82 |  |  | 1 |  | 1 |  |  |  |  |  |  |  |
| Guechemé | Bey-Bey | 2988 | 1 |  |  | 1 |  |  |  |  | 1 |  |  |  |
| Guechemé | Beye Beye | 2988 |  |  | 1 |  |  | 1 |  |  |  | 1 |  | 2 |
| Guechemé | Boyé Boyé | 1037 |  |  | 1 |  | 1 |  |  |  |  | 1 |  | 2 |
| Guechemé | Chelweye Dembi (Halweye) | 1565 |  |  | 1 |  |  | 1 |  |  |  |  |  |  |
| Guechemé | Choukoura | 417 |  |  | 1 |  |  | 1 |  |  |  | 1 |  | 2 |
| Guechemé | Damana | 1216 |  |  | 1 |  | 1 |  |  | 1 |  |  |  | 2 |
| Guechemé | Damana Peulh | 465 |  |  | 1 |  |  |  |  | 1 |  |  |  |  |
| Guechemé | Djabadaduiwa Aoua |  |  |  | 1 |  |  |  |  |  | 1 |  |  |  |
| Guechemé | Djabdaguiwa (Djabada Gouiwa) | 1359 |  |  | 1 |  |  |  |  |  | 1 |  |  |  |
| Guechemé | Fadama | 3603 | 1 |  |  | 1 |  |  | 1 | 1 |  | 1 |  | 3 |
| Guechemé | Fadama | 3603 |  |  | 1 |  | 1 | 1 | 1 |  | 1 | 1 |  | 5 |
| Guechemé | Falmay |  | 1 |  |  |  |  |  |  |  | 1 |  |  |  |
| Guechemé | Gabasse |  | 1 |  |  |  |  |  |  |  | 1 |  |  |  |
| Guechemé | Garin Anroua |  |  |  | 1 |  |  |  |  |  |  |  |  |  |
| Guechemé | Garin Ganga | 261 |  |  | 1 |  |  |  | 1 |  |  |  |  |  |
| Guechemé | Garin Gao |  |  |  | 1 |  |  |  |  |  | 1 |  |  |  |
| Guechemé | Garin Léla (G. Lele) | 149 |  |  | 1 | 1 |  | 1 |  | 1 |  | 1 |  | 3 |
| Guechemé | Garin Lele | 149 | 1 |  |  |  |  |  | 1 |  | 1 |  |  | 2 |
| Guechemé | Goubawa | 946 | 1 |  |  | 1 |  |  |  | 1 |  | 1 |  | 2 |
| Guechemé | Goubawa | 946 |  |  | 1 |  |  | 1 | 1 |  |  | 1 |  | 3 |
| Guechemé | Guechemé | 8412 | 1 |  |  | 1 |  |  |  | 1 |  | 1 |  | 2 |
| Guechemé | Guechemé | 8412 |  |  | 1 |  |  | 1 |  |  |  |  |  |  |
| Guechemé | Guézeraou | 724 |  |  | 1 |  |  |  |  |  |  | 1 |  |  |
| Guechemé | Guidal | 503 |  |  | 1 |  |  | 1 |  | 1 |  |  |  | 2 |
| Guechemé | Guiwayé | 1661 | 1 |  |  | 1 |  |  |  |  |  | 1 |  |  |
| Guechemé | Guiwayé | 1661 |  |  | 1 |  |  |  |  |  | 1 | 1 |  | 2 |
| Guechemé | Guiwayé Toudoua | 205 |  |  | 1 |  |  |  |  |  |  | 1 |  |  |
| Guechemé | Guizarawa | 310 | 1 |  |  | 1 |  |  | 1 |  | 1 |  |  | 2 |
| Guechemé | Guizarawa | 310 |  |  | 1 |  |  | 1 |  | 1 |  |  |  | 2 |
| Guechemé | Here Damchi | 835 |  |  | 1 |  |  |  |  | 1 |  |  |  |  |
| Guechemé | Here Damtche Peulh | 252 |  |  | 1 |  |  | 1 |  | 1 |  |  |  | 2 |
| Guechemé | Here Dantche | 740 | 1 |  |  |  |  |  | 1 |  | 1 |  |  | 2 |
| Guechemé | Houri | 533 |  |  | 1 |  |  | 1 |  |  |  |  |  |  |
| Guechemé | Jamma Zoubi | 567 |  |  | 1 |  |  | 1 |  |  |  |  |  |  |
| Guechemé | Kahirou | 323 |  |  | 1 |  |  | 1 |  | 1 |  |  |  | 2 |
| Guechemé | Kalgo | 861 |  |  | 1 |  |  | 1 |  |  |  |  |  |  |
| Guechemé | Kanda | 1730 |  |  | 1 |  |  | 1 |  |  |  |  |  |  |
| Guechemé | Kao Kao | 819 |  |  | 1 |  |  |  |  | 1 |  |  |  |  |
| Guechemé | Katami | 1233 |  |  | 1 |  |  | 1 |  |  | 1 |  |  | 2 |
| Guechemé | Katarma (K. Garin Gaoh) | 483 | 1 |  |  | 1 |  |  |  | 1 |  |  |  |  |
| Guechemé | Katarma (K. Garin Gaoh) | 483 |  |  | 1 |  |  |  |  | 1 |  |  |  |  |
| Guechemé | Kotadeye | 1007 |  |  | 1 |  |  | 1 |  | 1 |  |  |  | 2 |
| Guechemé | Kouda Wadata | 429 |  |  | 1 |  |  | 1 |  |  | 1 |  |  | 2 |
| Guechemé | Kouda Zaouna | 534 |  |  | 1 |  |  | 1 |  |  | 1 |  |  | 2 |
| Guechemé | Kouka Oukou | 685 | 1 |  |  |  |  |  |  | 1 |  |  |  |  |
| Guechemé | Kourfayawa | 367 |  |  | 1 |  |  | 1 |  | 1 |  |  |  | 2 |
| Guechemé | Koutoulougué | 1064 |  |  | 1 |  |  | 1 |  | 1 |  |  |  | 2 |
| Guechemé | Landara | 2398 |  |  | 1 |  |  | 1 |  |  |  | 1 |  | 2 |
| Guechemé | Landara Sanké | 876 |  |  | 1 |  |  | 1 |  |  |  | 1 |  | 2 |
| Guechemé | Lido | 3674 | 1 |  |  | 1 |  |  |  |  |  | 1 |  |  |
| Guechemé | Lido | 3674 |  |  | 1 |  |  | 1 | 1 |  |  | 1 |  | 3 |
| Guechemé | Lido Peulh | 134 |  |  | 1 |  |  | 1 | 1 |  |  |  |  | 2 |
| Guechemé | Lokoko | 3944 | 1 |  |  | 1 |  |  |  | 1 | 1 |  |  | 2 |
| Guechemé | Lokoko | 3944 |  |  | 1 |  | 1 |  |  | 1 |  | 1 |  | 3 |
| Guechemé | Lougou |  | 1 |  |  |  |  |  |  |  | 1 |  |  |  |
| Guechemé | Madoki | 493 |  |  | 1 |  | 1 |  |  | 1 |  |  |  | 2 |
| Guechemé | Magé (Maje Toudawa) | 1437 |  |  | 1 |  |  |  |  |  | 1 |  |  |  |
| Guechemé | Magori | 712 |  |  | 1 |  |  |  |  |  | 1 |  |  |  |
| Guechemé | Maizari Mainassara | 264 |  |  | 1 |  | 1 |  |  |  |  |  |  |  |
| Guechemé | Makoissa Fallawa |  |  |  | 1 |  |  |  | 1 |  | 1 |  |  | 2 |
| Guechemé | Makoissa Toudawa (Toudouwa) | 647 |  |  | 1 |  |  |  | 1 |  | 1 |  |  | 2 |
| Guechemé | Makorwa | 1829 |  |  | 1 |  |  |  |  | 1 |  |  |  |  |
| Guechemé | Mouzou Mouzou | 890 |  |  | 1 |  |  | 1 |  |  |  |  |  |  |
| Guechemé | Rounkoundoum | 245 |  |  | 1 |  |  | 1 |  |  | 1 |  |  | 2 |
| Guechemé | Sabarou | 1034 | 1 |  |  | 1 |  |  |  |  | 1 |  |  |  |
| Guechemé | Sabarou | 1034 |  |  | 1 |  | 1 |  |  |  |  |  |  |  |
| Guechemé | Sabon Gari Foga | 3567 | 1 |  |  |  |  |  | 1 |  |  | 1 |  | 2 |
| Guechemé | Sabongari | 3567 |  |  | 1 |  |  |  | 1 |  | 1 | 1 |  | 3 |
| Guechemé | Sakoira | 873 | 1 |  |  |  |  |  |  |  |  | 1 |  |  |
| Guechemé | Samia [Tsamia?] | 1154 | 1 |  |  |  |  |  |  |  |  | 1 |  |  |
| Guechemé | Takassaba (T. Adoua) | 312 | 1 |  |  |  |  |  | 1 | 1 |  |  |  | 2 |
| Guechemé | Takatsaba (T. Kouka) | 397 |  |  | 1 |  | 1 | 1 |  | 1 | 1 |  |  | 4 |
| Guechemé | Tapkin-Inoua | 586 |  |  | 1 |  |  | 1 |  | 1 |  |  |  | 2 |
| Guechemé | Tombo Dogo | 2050 |  |  | 1 |  |  | 1 |  |  |  | 1 |  | 2 |
| Guechemé | Tombo Dogo Peulh | 111 |  |  | 1 |  |  | 1 |  |  |  |  |  |  |
| Guechemé | Tombo Tounga | 856 |  |  | 1 |  |  |  |  |  |  | 1 |  |  |
| Guechemé | Toudoun Faila | 1440 |  |  | 1 |  |  |  |  |  |  | 1 |  |  |
| Guechemé | Touhéré | 408 |  |  | 1 |  |  |  | 1 |  |  |  |  |  |
| Guechemé | Tounga Chawa |  | 1 |  |  |  |  |  |  | 1 |  |  |  |  |
| Guechemé | Tounga Dobi | 312 |  |  | 1 |  |  |  |  |  |  | 1 |  |  |
| Guechemé | Tounga Gamji | 946 |  |  | 1 |  |  |  |  |  |  | 1 |  |  |
| Guechemé | Tounga Kade | 671 | 1 |  |  |  |  |  |  |  |  | 1 |  |  |
| Guechemé | Tounga Maikomsa | 353 | 1 |  |  |  |  |  |  | 1 |  |  |  |  |
| Guechemé | Tounga Soli | 397 | 1 |  |  | 1 |  |  |  | 1 |  | 1 |  | 2 |
| Guechemé | Tounga Soli | 397 |  |  | 1 |  |  |  |  |  | 1 | 1 |  | 2 |
| Guechemé | Tsamia | 1154 |  |  | 1 |  |  |  |  |  | 1 | 1 |  | 2 |
| Guechemé | Wassangou | 1188 |  |  | 1 |  |  |  |  | 1 |  |  |  |  |
| Guechemé | Yangana | 312 | 1 |  |  | 1 |  |  |  |  | 1 |  |  |  |
| Guechemé | Yangana | 312 |  |  | 1 |  |  |  |  | 1 | 1 | 1 |  | 3 |
| Guechemé | Yangana Peul | 441 |  |  | 1 |  |  |  |  | 1 | 1 | 1 |  | 3 |
| Guechemé | Zagari | 213 |  |  | 1 |  |  |  |  |  |  | 1 |  |  |
| Guilladjé | Afodamata | 1805 |  |  | 1 |  |  | 1 |  |  |  |  |  |  |
| Guilladjé | Alfa Koira | 653 |  |  | 1 |  |  |  | 1 |  |  |  |  |  |
| Guilladjé | Bariké Koira | 717 |  |  | 1 |  |  | 1 |  | 1 | 1 |  |  | 3 |
| Guilladjé | Bounou Koiara | 244 | 1 |  |  |  |  |  | 1 |  |  |  |  |  |
| Guilladjé | Bouringa Kaina | 342 |  |  | 1 |  |  |  | 1 |  |  |  |  |  |
| Guilladjé | Djabali Djerma | 407 | 1 |  |  |  |  |  | 1 |  |  |  |  |  |
| Guilladjé | Djabali Peulh | 488 | 1 |  |  | 1 |  |  | 1 |  |  |  |  |  |
| Guilladjé | Djabali Peulh | 488 |  |  | 1 |  |  |  | 1 |  |  |  |  |  |
| Guilladjé | Djabali Zarma | 407 |  |  | 1 |  |  |  | 1 |  |  |  |  |  |
| Guilladjé | Garbou | 417 |  |  | 1 |  |  | 1 |  |  |  |  |  |  |
| Guilladjé | Guilladjé | 2238 |  |  | 1 | 1 |  |  | 1 |  |  |  |  |  |
| Guilladjé | Guilladjié | 2238 | 1 |  |  |  |  |  | 1 |  |  |  |  |  |
| Guilladjé | Hamdalaye Hama | 747 | 1 |  |  | 1 |  |  | 1 |  |  |  |  |  |
| Guilladjé | Hamdallaye Hama | 747 |  |  | 1 |  |  | 1 |  |  |  |  |  |  |
| Guilladjé | Hamdallaye Hassane |  | 1 |  |  |  |  |  | 1 |  |  |  |  |  |
| Guilladjé | Ladenedji Djerma | 1402 | 1 |  |  | 1 |  |  | 1 |  |  |  |  |  |
| Guilladjé | Ladenedjo Djerma | 1402 |  |  | 1 |  |  |  | 1 |  |  |  |  |  |
| Guilladjé | Ladenedji Yaro |  | 1 |  |  |  |  |  | 1 |  |  |  |  |  |
| Guilladjé | Ladenedjo Peulh | 472 |  |  | 1 |  |  |  | 1 |  |  |  |  |  |
| Guilladjé | Sansaré | 381 |  |  | 1 |  |  |  | 1 |  |  |  |  |  |
| Guilladjé | Sour Sour | 140 | 1 |  |  |  |  |  | 1 |  |  |  |  |  |
| Guilladjé | Tchangue | 439 |  |  | 1 |  |  | 1 |  |  |  |  |  |  |
| Guilladjé | Toudourou | 385 |  |  | 1 |  |  |  | 1 |  |  |  |  |  |
| Guilladjé | Tourou Tourou Koira | 1432 | 1 |  |  | 1 |  |  | 1 |  |  |  |  |  |
| Guilladjé | Tourou Tourou Koira | 1432 |  |  | 1 |  |  |  | 1 |  |  |  |  |  |
| Guilladjé | Windi Bago | 1708 |  |  | 1 | 1 |  | 1 | 1 |  |  |  |  | 2 |
| Guilladjé | Windi Bago Peulh | 1708 | 1 |  |  |  |  |  | 1 |  |  |  |  |  |
| Harikanassou | Alfa Bire Moumouni | 388 |  |  | 1 |  | 1 |  |  |  |  |  |  |  |
| Harikanassou | Bella Koira | 679 |  |  | 1 |  | 1 | 1 |  | 1 |  | 1 |  | 4 |
| Harikanassou | Bogol Hima | 1571 |  |  | 1 |  | 1 | 1 |  | 1 |  | 1 |  | 4 |
| Harikanassou | Bogol Mamar | 682 |  |  | 1 |  | 1 | 1 |  | 1 |  |  |  | 3 |
| Harikanassou | Daniaré Koira Tégui | 155 |  |  | 1 |  | 1 |  |  |  |  | 1 |  | 2 |
| Harikanassou | Fandou Djadi | 611 |  |  | 1 |  | 1 |  |  |  |  |  |  |  |
| Harikanassou | Fandou Djibo | 211 |  |  | 1 |  | 1 |  |  |  |  |  |  |  |
| Harikanassou | Gamsa Zougou | 424 |  |  | 1 |  | 1 |  |  | 1 |  | 1 |  | 3 |
| Harikanassou | Gorou Kaina | 770 |  |  | 1 |  | 1 |  |  |  |  |  |  |  |
| Harikanassou | Gounoubi | 334 |  |  | 1 |  | 1 | 1 |  | 1 |  | 1 |  | 4 |
| Harikanassou | Harikanassou (H. Djerma) | 1416 |  |  | 1 |  | 1 | 1 |  | 1 |  | 1 |  | 4 |
| Harikanassou | Komaguindi Peulh | 270 |  |  | 1 |  | 1 |  |  |  |  |  |  |  |
| Harikanassou | Komaguindi Zou | 368 |  |  | 1 |  | 1 |  |  |  |  |  |  |  |
| Harikanassou | Koubobi Koura | 1230 |  |  | 1 |  | 1 |  |  |  |  |  |  |  |
| Harikanassou | Koubobo Sori | 825 |  |  | 1 |  | 1 |  |  |  |  |  |  |  |
| Harikanassou | Kouringuel Kaou | 162 |  |  | 1 |  | 1 |  |  |  |  | 1 |  | 2 |
| Harikanassou | Kouringuel Mayaki | 1778 |  |  | 1 |  | 1 |  |  | 1 |  | 1 |  | 3 |
| Harikanassou | Niabére Bella Peulh | 183 |  |  | 1 |  | 1 | 1 |  |  |  |  |  | 2 |
| Harikanassou | Niabéré Djambé | 1123 |  |  | 1 |  | 1 |  |  |  |  |  |  |  |
| Harikanassou | Niabére Kaina | 1144 |  |  | 1 | 1 | 1 |  |  | 1 |  |  |  | 2 |
| Harikanassou | Niembére Kaina | 1144 | 1 |  |  |  | 1 |  |  |  |  |  |  |  |
| Harikanassou | Niabéré Moulay Djerma | 1113 |  |  | 1 |  | 1 | 1 |  |  |  |  |  | 2 |
| Harikanassou | Nilley Koira | 369 |  |  | 1 |  | 1 |  |  |  |  | 1 |  | 2 |
| Harikanassou | Oulahal Peulh | 137 |  |  | 1 |  | 1 |  |  | 1 |  | 1 |  | 3 |
| Harikanassou | Oulhal Djerma | 340 |  |  | 1 |  | 1 |  |  | 1 |  | 1 |  | 3 |
| Harikanassou | Samdé Moussa | 251 |  |  | 1 |  | 1 |  |  |  |  |  |  |  |
| Harikanassou | Samdé Saidou | 136 |  |  | 1 |  | 1 |  |  |  |  |  |  |  |
| Harikanassou | Tombo Peulh | 508 |  |  | 1 |  | 1 |  |  |  |  |  |  |  |
| Harikanassou | Wawaré | 150 |  |  | 1 |  | 1 |  |  |  |  |  |  |  |
| Harikanassou | Zagoré Djerma | 645 |  |  | 1 |  | 1 |  |  |  |  | 1 |  | 2 |
| Kankandi | Bangoukokou | 985 |  |  | 1 |  |  |  |  |  |  |  | 1 |  |
| Kankandi | Bongouroual | 485 |  |  | 1 |  |  |  |  |  |  |  | 1 |  |
| Kankandi | Guiribani Koira | 387 |  |  | 1 |  |  |  |  |  |  |  | 1 |  |
| Kankandi | Kankandi | 971 | 1 |  |  | 1 |  | 1 |  |  |  |  |  |  |
| Kankandi | Kankandi | 971 |  |  | 1 |  |  |  |  |  |  |  | 1 |  |
| Kankandi | Kobial | 130 |  |  | 1 |  |  |  |  |  |  |  | 1 |  |
| Kankandi | Samba Koira | 608 |  |  | 1 |  |  |  |  |  |  |  | 1 |  |
| Kankandi | Souda Ahijo | 565 |  |  | 1 |  |  |  |  |  |  |  | 1 |  |
| Kankandi | Souda Peulh | 538 |  |  | 1 |  |  |  |  |  |  |  | 1 |  |
| Kankandi | Souda Zarma | 158 |  |  | 1 |  |  |  |  |  |  |  | 1 |  |
| Kankandi | Tchamey | 135 |  |  | 1 |  |  |  |  |  |  |  | 1 |  |
| Kankandi | Were Djatamé Peulh | 217 |  |  | 1 |  |  |  |  |  |  |  | 1 |  |
| Karakara | Abdoulazi | 740 |  |  | 1 |  | 1 |  | 1 | 1 |  | 1 |  | 4 |
| Karakara | Agonga | 688 |  |  | 1 |  |  |  |  | 1 |  | 1 |  | 2 |
| Karakara | Angoal Dambo | 557 |  |  | 1 |  | 1 | 1 | 1 | 1 |  | 1 |  | 5 |
| Karakara | Angoal kadé | 248 |  |  | 1 |  |  |  |  | 1 |  | 1 |  | 2 |
| Karakara | Angoal labboua | 681 |  |  | 1 |  |  |  | 1 |  |  | 1 |  | 2 |
| Karakara | Angoual Damagani | 830 |  |  | 1 |  | 1 |  |  | 1 |  |  |  | 2 |
| Karakara | Angoual Doua Abarchi | 297 |  |  | 1 |  |  |  | 1 |  |  |  |  |  |
| Karakara | Angoual Doua Babba | 260 |  |  | 1 |  |  |  | 1 | 1 |  |  |  | 2 |
| Karakara | Angoual Gao | 148 |  |  | 1 |  |  |  | 1 | 1 |  | 1 |  | 3 |
| Karakara | Angoual Issaka | 576 |  |  | 1 |  |  | 1 | 1 | 1 |  |  |  | 3 |
| Karakara | Angoual Leilaba | 471 |  |  | 1 |  |  |  | 1 |  |  |  |  |  |
| Karakara | Angoual Leilaba | 471 |  |  | 1 |  |  |  |  | 1 | 1 |  |  | 2 |
| Karakara | Angoual Mayaou | 195 |  |  | 1 |  |  |  | 1 | 1 | 1 |  |  | 3 |
| Karakara | Angoul Doua Abarchi | 297 |  |  | 1 |  |  |  |  | 1 |  |  |  |  |
| Karakara | Angoula Dangné | 466 |  |  | 1 |  |  |  |  | 1 |  |  |  |  |
| Karakara | Bourgami | 512 |  |  | 1 |  |  |  | 1 | 1 | 1 |  |  | 3 |
| Karakara | Chirimbaou | 396 |  |  | 1 |  |  |  | 1 | 1 | 1 | 1 |  | 4 |
| Karakara | Dogondagi | 474 |  |  | 1 |  | 1 |  |  |  |  |  |  |  |
| Karakara | Gouma | 446 |  |  | 1 |  |  |  |  | 1 |  |  |  |  |
| Karakara | Guigane | 433 |  |  | 1 |  |  |  | 1 |  |  |  |  |  |
| Karakara | Illéla | 845 |  |  | 1 |  |  |  |  | 1 | 1 | 1 |  | 3 |
| Karakara | Illéla Goudia | 321 |  |  | 1 |  |  | 1 |  |  |  |  |  |  |
| Karakara | Kalgo | 2546 |  |  | 1 |  |  | 1 |  | 1 | 1 |  |  | 3 |
| Karakara | Kara Kara | 2634 |  |  | 1 |  | 1 | 1 | 1 | 1 | 1 | 1 |  | 6 |
| Karakara | Kizamou | 1069 |  |  | 1 |  | 1 | 1 | 1 | 1 |  |  |  | 4 |
| Kara Kara | Koudourou | 2377 | 1 |  |  | 1 |  |  | 1 |  |  |  |  |  |
| Karakara | Koudourou | 2377 |  |  | 1 |  | 1 |  | 1 | 1 | 1 |  |  | 4 |
| Karakara | Légueré | 646 |  |  | 1 |  | 1 | 1 | 1 | 1 |  |  |  | 4 |
| Karakara | Madotchiné | 712 |  |  | 1 |  |  | 1 | 1 | 1 |  | 1 |  | 4 |
| Karakara | Mallé | 506 |  |  | 1 |  |  |  | 1 | 1 | 1 |  |  | 3 |
| Karakara | Massama | 1175 |  |  | 1 |  | 1 |  | 1 | 1 |  | 1 |  | 4 |
| Karakara | Matankari 1 | 449 |  |  | 1 |  |  |  | 1 | 1 | 1 | 1 |  | 4 |
| Karakara | Matankari 2 | 732 |  |  | 1 |  |  |  | 1 | 1 | 1 | 1 |  | 4 |
| Karakara | Nassarawa | 292 |  |  | 1 |  |  |  |  | 1 | 1 |  |  | 2 |
| Karakara | Rouga Tsamia | 551 |  |  | 1 |  |  |  | 1 |  | 1 |  |  | 2 |
| Karakara | Tombo Bizaozaou | 551 |  |  | 1 |  |  |  | 1 | 1 | 1 |  |  | 3 |
| Karakara | Tombo Bozari | 595 |  |  | 1 |  |  |  | 1 | 1 | 1 |  |  | 3 |
| Karakara | Tombo Mouza | 410 |  |  | 1 |  |  | 1 |  | 1 |  |  |  | 2 |
| Karakara | Tombo Na Maine (T. Nameini) | 412 |  |  | 1 |  |  |  | 1 | 1 | 1 |  |  | 3 |
| Karakara | Yeldou | 2020 |  |  | 1 |  | 1 | 1 |  | 1 | 1 |  |  | 4 |
| Kargui Bangou | Bodo Sanke |  | 1 |  |  |  | 1 |  |  |  |  |  |  |  |
| Kargui Bangou | Bolbol |  | 1 |  |  |  |  |  |  | 1 |  |  |  |  |
| Kargui Bangou | Bolbol Kodi | 339 |  |  | 1 |  | 1 | 1 |  |  |  |  |  | 2 |
| Kargui Bangou | Bolbol Manga | 59 |  |  | 1 |  | 1 |  |  |  |  |  |  |  |
| Kargui Bangou | Bolbol Marafa | 393 |  |  | 1 |  | 1 |  |  |  | 1 |  |  | 2 |
| Kargui Bangou | Bouroum | 752 |  |  | 1 |  | 1 |  |  |  |  |  |  |  |
| Kargui Bangou | Dey Tegui Hamani | 246 |  |  | 1 |  |  | 1 |  |  | 1 |  |  | 2 |
| Kargui Bangou | Deykoukou Est | 410 |  |  | 1 |  | 1 |  |  |  |  |  |  |  |
| Kargui Bangou | Dormi Koara | 257 |  |  | 1 |  | 1 |  |  |  |  |  |  |  |
| Kargui Bangou | Faran Koira | 290 |  |  | 1 |  |  |  |  |  | 1 |  |  |  |
| Kargui Bangou | Garbey Koara | 601 |  |  | 1 |  | 1 |  |  |  |  |  | 1 | 2 |
| Kargui Bangou | Gnandou koara | 500 |  |  | 1 |  |  |  |  |  |  | 1 |  |  |
| Kargui Bangou | Goumendey | 1568 |  |  | 1 |  |  |  |  |  | 1 |  |  |  |
| Kargui Bangou | Gueda Koira | 455 |  |  | 1 |  |  | 1 |  |  |  |  |  |  |
| Kargui Bangou | Hima Dey | 951 | 1 |  |  | 1 |  |  | 1 |  |  |  |  |  |
| Kargui Bangou | Hima Dey | 951 |  |  | 1 |  | 1 |  |  |  |  |  | 1 | 2 |
| Kargui Bangou | Kargui Bangou | 2141 | 1 |  |  | 1 |  |  |  | 1 |  |  |  |  |
| Kargui Bangou | Kargui Bangou | 2141 |  |  | 1 |  | 1 |  |  |  |  |  |  |  |
| Kargui Bangou | Kata Babadey | 1253 | 1 |  |  |  |  |  |  | 1 |  |  |  |  |
| Kargui Bangou | Katababa dey | 1046 |  |  | 1 |  |  |  |  |  |  | 1 | 1 | 2 |
| Kargui Bangou | Kobe Koira | 455 |  |  | 1 |  |  |  |  |  | 1 |  |  |  |
| Kargui Bangou | Komdi bangou | 619 |  |  | 1 |  |  |  |  |  |  | 1 | 1 | 2 |
| Kargui Bangou | Korombe Koira | 303 |  |  | 1 |  |  | 1 |  |  | 1 |  | 1 | 3 |
| Kargui Bangou | Maiyaki Koira | 285 |  |  | 1 |  | 1 |  |  |  |  |  |  |  |
| Kargui Bangou | Mamoudou Koara | 1153 | 1 |  |  |  |  |  |  | 1 |  |  |  |  |
| Kargui Bangou | Mamoudou koira | 1271 |  |  | 1 |  |  |  |  |  |  | 1 | 1 | 2 |
| Kargui Bangou | Mayel | 410 |  |  | 1 |  |  |  |  |  |  | 1 | 1 | 2 |
| Kargui Bangou | Moussa Koira | 581 |  |  | 1 |  | 1 |  |  |  |  |  |  |  |
| Kargui Bangou | Moussa Koukou Kouara | 630 | 1 |  |  |  |  |  |  | 1 |  |  |  |  |
| Kargui Bangou | Niandou Koira | 414 |  |  | 1 |  | 1 | 1 |  |  |  |  |  | 2 |
| Kargui Bangou | Raba Zarma | 730 |  |  | 1 |  |  |  |  |  |  |  | 1 |  |
| Kargui Bangou | Sabara Dey | 111 | 1 |  |  | 1 |  |  | 1 |  |  |  |  |  |
| Kargui Bangou | Sabara Dey | 111 |  |  | 1 |  | 1 |  |  |  |  |  |  |  |
| Kargui Bangou | Sabka Gozi | 438 |  |  | 1 |  | 1 |  |  |  |  |  |  |  |
| Kargui Bangou | Sabka Yerima | 549 |  |  | 1 |  |  |  |  |  |  |  | 1 |  |
| Kargui Bangou | Sankindiadey (Sarkindiadey) | 300 |  |  | 1 |  | 1 |  |  |  |  |  |  |  |
| Kargui Bangou | Shada Garin Bagouma | 349 |  |  | 1 |  | 1 |  |  |  |  |  |  |  |
| Kargui Bangou | Sogossa Karsani | 1251 |  |  | 1 |  |  | 1 |  |  | 1 |  |  | 2 |
| Kargui Bangou | Son Allah koara | 958 |  |  | 1 |  | 1 |  |  |  |  | 1 | 1 | 3 |
| Kargui Bangou | Son Allah Kouara | 785 | 1 |  |  |  |  |  |  | 1 |  |  |  |  |
| Kargui Bangou | Tamo Koira | 1236 |  |  | 1 |  |  |  |  |  | 1 |  |  |  |
| Kargui Bangou | Tchiangalla | 1438 |  |  | 1 |  |  |  |  |  |  |  | 1 |  |
| Kargui Bangou | Tombo Barke | 235 |  |  | 1 |  | 1 |  |  |  |  |  | 1 | 2 |
| Kargui Bangou | Tombo Seida | 91 | 1 |  |  |  | 1 |  |  |  |  |  |  |  |
| Kargui Bangou | Tombo Tafa | 632 |  |  | 1 |  | 1 |  |  |  |  |  | 1 | 2 |
| Kargui Bangou | Tombotseyda | 100 |  |  | 1 |  |  |  |  |  |  | 1 |  |  |
| Kargui Bangou | Tounga Maiyaki | 928 |  |  | 1 |  | 1 |  |  |  | 1 | 1 |  | 3 |
| Kargui Bangou | Tounga Mayaki | 928 | 1 |  |  |  | 1 |  |  |  |  |  |  |  |
| Kargui Bangou | Walio Koira | 707 |  |  | 1 |  | 1 |  |  |  |  |  |  |  |
| Kargui Bangou | Wankoye Koira | 427 |  |  | 1 |  | 1 | 1 |  |  |  |  |  | 2 |
| Kargui Bangou | Yello Beri | 764 |  |  | 1 |  | 1 |  |  |  |  |  |  |  |
| Kargui Bangou | Yélokeyna | 547 |  |  | 1 |  |  |  |  |  |  | 1 |  |  |
| Kargui Bangou | Yolley Koira | 243 |  |  | 1 |  |  | 1 |  |  | 1 |  |  | 2 |
| Kargui Bangou | Zabia Koira | 357 |  |  | 1 |  |  | 1 |  |  |  |  |  |  |
| Kargui Bangou | Zaborize Dey | 1048 |  |  | 1 |  | 1 |  |  |  |  |  |  |  |
| Kargui Bangou | Zanga Babadey | 971 |  |  | 1 | 1 | 1 |  |  |  |  |  |  |  |
| Kargui Bangou | Zango Babadey Banizoumb | 971 | 1 |  |  |  |  |  | 1 |  |  |  |  |  |
| Kieche | Angoual Na Ana Peulh | 382 |  |  | 1 | 1 |  |  |  |  | 1 |  |  |  |
| Kieche | Angoula Na Anaji | 382 |  |  | 1 |  | 1 |  |  |  | 1 |  |  | 2 |
| Kieche | Baboursayé | 249 |  |  | 1 |  |  |  |  |  | 1 |  |  |  |
| Kieche | Bado | 156 |  |  | 1 |  |  |  |  |  | 1 |  |  |  |
| Kieche | Bakar Kassa | 584 |  |  | 1 |  |  | 1 |  |  | 1 |  | 1 | 3 |
| Kieche | Bakin Tapki | 1402 | 1 |  |  | 1 |  |  |  |  | 1 |  |  |  |
| Kieche | Bakin Tapki | 1402 |  |  | 1 |  |  |  |  |  | 1 |  |  |  |
| Kieche | Biraye (Garin Mallam) | 685 | 1 |  |  |  |  |  |  |  |  | 1 |  |  |
| Kieche | Bouka Koré |  | 1 |  |  |  |  |  |  |  | 1 |  |  |  |
| Kieche | Dangari | 705 |  |  | 1 |  |  |  |  |  | 1 | 1 |  | 2 |
| Kieche | Darogi Dambo | 302 |  |  | 1 |  |  | 1 |  |  | 1 | 1 |  | 3 |
| Kieche | Darogi Massoyi | 1031 |  |  | 1 |  |  |  |  |  |  | 1 |  |  |
| Kieche | Darogi Tagara | 258 |  |  | 1 |  |  |  |  |  |  | 1 |  |  |
| Kieche | DarogiI Massoyi (D. Massoyi) | 431 | 1 |  |  |  |  |  |  |  | 1 |  |  |  |
| Kieche | Darojidambo (Darog Dambo) | 302 | 1 |  |  |  |  |  |  |  | 1 |  |  |  |
| Kieche | Dogon Gao | 825 |  |  | 1 |  |  |  |  |  |  |  | 1 |  |
| Kieche | Gagila (G. Mai Fala) | 1741 |  |  | 1 |  |  |  |  |  | 1 |  |  |  |
| Kieche | Gazila |  | 1 |  |  |  |  |  |  |  | 1 |  |  |  |
| Kieche | Gouala | 1067 |  |  | 1 |  |  |  |  |  | 1 |  |  |  |
| Kieche | Houmawa | 1031 | 1 |  |  | 1 |  |  |  |  | 1 |  |  |  |
| Kieche | Houmawa | 1031 |  |  | 1 |  |  |  |  |  | 1 |  |  |  |
| Kieche | Illela Goudia | 565 |  |  | 1 |  | 1 |  |  |  |  |  |  |  |
| Kieche | Jigola (Jougala) | 1166 |  |  | 1 | 1 | 1 |  |  |  | 1 |  |  | 2 |
| Kieche | Jougala | 1166 | 1 |  |  |  |  |  |  |  | 1 |  |  |  |
| Kieche | Jigola Peulh | 96 |  |  | 1 |  | 1 |  |  |  |  |  |  |  |
| Kieche | Kalon Mota | 499 |  |  | 1 |  | 1 |  |  |  | 1 |  |  | 2 |
| Kieche | Kieche | 2500 | 1 |  |  | 1 |  |  |  |  | 1 |  |  |  |
| Kieche | Kieche | 2500 |  |  | 1 |  |  |  |  |  | 1 |  |  |  |
| Kieche | Koniko Rindo | 335 |  |  | 1 | 1 |  | 1 |  |  | 1 |  |  | 2 |
| Kieche | Konko Rindo | 335 | 1 |  |  |  |  |  |  |  | 1 |  |  |  |
| Kieche | Kouakouare | 352 |  |  | 1 |  |  |  |  |  |  |  | 1 |  |
| Kieche | Makera | 530 |  |  | 1 |  | 1 |  |  |  |  |  |  |  |
| Kieche | Makera Peulh | 550 |  |  | 1 |  | 1 |  |  |  |  |  |  |  |
| Kieche | Mazoubi | 1483 |  |  | 1 |  | 1 |  |  |  | 1 |  |  | 2 |
| Kieche | Noufawa | 558 | 1 |  |  |  |  |  |  |  | 1 |  |  |  |
| Kieche | Rouda Adoua | 851 | 1 |  |  | 1 |  |  |  |  | 1 |  |  |  |
| Kieche | Rouda Adoua | 851 |  |  | 1 |  | 1 |  |  |  |  |  |  |  |
| Kieche | Sabongari | 102 |  |  | 1 |  |  |  |  |  |  | 1 | 1 | 2 |
| Kieche | Sandraoua |  | 1 |  |  |  |  |  |  |  | 1 |  |  |  |
| Kieche | Tachadagna |  | 1 |  |  |  |  |  |  |  | 1 |  |  |  |
| Kieche | Takare | 167 |  |  | 1 |  | 1 |  |  |  | 1 |  |  | 2 |
| Kieche | Takouindawa I | 808 |  |  | 1 |  |  | 1 |  |  | 1 |  | 1 | 3 |
| Kieche | Takouindawa II | 524 |  |  | 1 |  |  | 1 |  |  | 1 |  | 1 | 3 |
| Kieche | Tombon Kasso | 701 |  |  | 1 |  | 1 |  |  |  | 1 |  |  | 2 |
| Kieche | Tsandarawa | 466 |  |  | 1 |  |  |  |  |  | 1 |  |  |  |
| Kieche | Zagbou |  | 1 |  |  |  |  |  |  |  | 1 |  |  |  |
| Kiota | Alkawal Peulh | 193 |  |  | 1 |  |  |  | 1 |  | 1 |  |  | 2 |
| Kiota | Alkawal Zarma | 283 |  |  | 1 |  |  |  | 1 |  | 1 | 1 |  | 3 |
| Kiota | Balaré | 537 |  |  | 1 |  |  |  | 1 |  | 1 |  |  | 2 |
| Kiota | Bangario Moussa | 795 | 1 |  |  | 1 |  |  |  | 1 |  |  |  |  |
| Kiota | Bangario Moussa | 795 |  |  | 1 |  |  |  | 1 |  | 1 | 1 |  | 3 |
| Kiota | Bangario Peulh | 92 |  |  | 1 |  |  |  | 1 |  | 1 |  |  | 2 |
| Kiota | Bangario Zarma | 339 |  |  | 1 |  |  |  | 1 |  | 1 | 1 |  | 3 |
| Kiota | Bangario Zou | 486 | 1 |  |  | 1 |  |  |  | 1 |  |  |  |  |
| Kiota | Bangario Zou | 486 |  |  | 1 |  |  |  | 1 |  | 1 | 1 |  | 3 |
| Kiota | Goumadey | 540 |  |  | 1 |  |  | 1 | 1 |  | 1 |  |  | 3 |
| Kiota | Kalla Peulh | 330 |  |  | 1 |  |  | 1 | 1 |  | 1 |  |  | 3 |
| Kiota | Kalla Zarma (Beri) | 278 |  |  | 1 |  |  | 1 | 1 |  | 1 |  |  | 3 |
| Kiota | Kiota Mayaki | 630 |  |  | 1 |  |  | 1 | 1 |  | 1 | 1 |  | 4 |
| Kiota | Kiota Oumarou | 1297 | 1 |  |  | 1 |  |  | 1 |  |  |  |  |  |
| Kiota | Kiota Oumarou | 1297 |  |  | 1 |  |  | 1 | 1 |  | 1 | 1 |  | 4 |
| Kiota | Kiota Peulh | 403 |  |  | 1 |  |  | 1 | 1 |  | 1 |  |  | 3 |
| Kiota | Kiota Touareg | 455 |  |  | 1 |  |  |  | 1 |  | 1 | 1 |  | 3 |
| Kiota | Kissin Kissin | 462 |  |  | 1 |  |  | 1 | 1 |  | 1 |  |  | 3 |
| Kiota | Kokitamou | 426 |  |  | 1 |  |  |  | 1 |  | 1 |  |  | 2 |
| Kiota | Kolbou peulh | 417 |  |  | 1 |  |  | 1 | 1 |  | 1 | 1 |  | 4 |
| Kiota | Kolbou Zarma | 1764 | 1 |  |  | 1 |  |  |  | 1 |  |  |  |  |
| Kiota | Kolbou Zarma | 1764 |  |  | 1 |  |  | 1 | 1 |  | 1 | 1 |  | 4 |
| Kiota | Koubou Koira Zarma | 426 |  |  | 1 |  |  |  | 1 |  | 1 |  |  | 2 |
| Kiota | Malairey Peulh | 171 |  |  | 1 |  |  | 1 | 1 |  | 1 |  |  | 3 |
| Kiota | Malarey Zarma | 413 |  |  | 1 |  |  |  | 1 |  | 1 |  |  | 2 |
| Kiota | Nazamné | 999 |  |  | 1 |  |  | 1 | 1 |  | 1 | 1 |  | 4 |
| Kiota | Oudé Ali | 607 |  |  | 1 |  |  |  | 1 |  |  |  |  |  |
| Kiota | Oudé Ali Peulh | 266 |  |  | 1 |  |  |  | 1 |  | 1 | 1 |  | 3 |
| Kiota | Oudé Ali Zarma | 238 |  |  | 1 |  |  |  | 1 |  | 1 |  |  | 2 |
| Kiota | Oudé Bombey Peulh | 159 |  |  | 1 |  |  |  | 1 |  | 1 |  |  | 2 |
| Kiota | Oudé Dourfey Peulh | 228 |  |  | 1 |  |  |  | 1 |  | 1 |  |  | 2 |
| Kiota | Oudé Dourfey Zarma | 228 |  |  | 1 |  |  |  | 1 |  | 1 |  |  | 2 |
| Kiota | Oudé Elhadji | 85 |  |  | 1 |  |  |  | 1 |  | 1 |  |  | 2 |
| Kiota | Oudé Saibou | 707 |  |  | 1 |  |  |  | 1 |  | 1 |  |  | 2 |
| Kiota | Tombo Gabdakoye | 399 |  |  | 1 |  |  |  | 1 |  | 1 | 1 |  | 3 |
| Kore Mairoua | Boureimi | 1861 | 1 |  |  |  | 1 |  |  |  | 1 |  |  | 2 |
| Kore Mairoua | Garin Kanna | 685 | 1 |  |  |  |  |  |  |  | 1 |  |  |  |
| Kore Mairoua | Kore Mairoua | 7388 | 1 |  |  |  |  |  |  |  |  | 1 |  |  |
| Kore Mairoua | Toudou | 146 | 1 |  |  |  |  |  | 1 |  |  |  |  |  |
| Koré Mairoua | Angoual Dar Baare | 900 |  |  | 1 |  | 1 |  |  | 1 |  |  |  | 2 |
| Koré Mairoua | Angoual Taoura | 317 |  |  | 1 |  | 1 |  | 1 |  |  |  |  | 2 |
| Koré Mairoua | Badifa | 1299 |  |  | 1 |  | 1 |  | 1 |  | 1 |  |  | 3 |
| Koré Mairoua | Banguiro | 364 |  |  | 1 |  | 1 |  |  |  | 1 | 1 |  | 3 |
| Koré Mairoua | Banizoumboun Issa | 548 |  |  | 1 |  | 1 |  |  |  |  |  |  |  |
| Koré Mairoua | Barebari Doula | 593 |  |  | 1 |  | 1 |  | 1 | 1 | 1 | 1 |  | 5 |
| Koré Mairoua | Baziga | 232 |  |  | 1 |  |  | 1 |  |  |  |  |  |  |
| Koré Mairoua | Bounzoum | 470 |  |  | 1 |  | 1 |  |  |  | 1 | 1 |  | 3 |
| Koré Mairoua | Boureimi | 1861 |  |  | 1 |  | 1 |  |  |  |  |  |  |  |
| Koré Mairoua | Chédam | 221 |  |  | 1 |  | 1 |  | 1 |  | 1 | 1 |  | 4 |
| Koré Mairoua | Doula | 756 |  |  | 1 |  | 1 |  |  | 1 | 1 | 1 |  | 4 |
| Koré Mairoua | Gandabala | 109 |  |  | 1 |  |  |  | 1 |  |  |  |  |  |
| Koré Mairoua | Garanga Doula | 694 |  |  | 1 |  | 1 |  | 1 | 1 | 1 | 1 |  | 5 |
| Koré Mairoua | Garin Aouta | 757 |  |  | 1 |  |  |  | 1 |  | 1 | 1 |  | 3 |
| Koré Mairoua | Garin Dan Bina | 285 |  |  | 1 |  |  |  |  |  | 1 | 1 |  | 2 |
| Koré Mairoua | Garin Gargoua | 200 |  |  | 1 |  |  |  | 1 | 1 |  |  |  | 2 |
| Koré Mairoua | Garin Kadadé | 441 |  |  | 1 |  |  |  |  |  | 1 | 1 |  | 2 |
| Koré Mairoua | Garin Mallam (G.M. Dagaina) | 239 |  |  | 1 |  | 1 |  |  |  |  |  |  |  |
| Koré Mairoua | Garin Mouskouri | 132 |  |  | 1 |  |  |  | 1 |  |  |  |  |  |
| Koré Mairoua | Golo Soli | 843 |  |  | 1 |  | 1 |  |  |  |  |  |  |  |
| Koré Mairoua | Goubawa | 1314 |  |  | 1 |  |  |  | 1 |  |  |  |  |  |
| Koré Mairoua | Hamdallaye | 635 |  |  | 1 |  | 1 |  | 1 |  | 1 |  |  | 3 |
| Koré Mairoua | Haoussawa | 694 |  |  | 1 |  |  |  | 1 |  |  |  |  |  |
| Koré Mairoua | Illela | 25 |  |  | 1 |  |  | 1 |  |  |  |  |  |  |
| Koré Mairoua | Imanan Bani Zoumbou | 575 |  |  | 1 |  | 1 |  | 1 |  |  |  |  | 2 |
| Koré Mairoua | Kaini kougoum | 493 |  |  | 1 |  |  |  | 1 |  | 1 |  |  | 2 |
| Koré Mairoua | Korémairoua | 7388 |  |  | 1 |  |  |  | 1 | 1 | 1 | 1 |  | 4 |
| Koré Mairoua | Korongobey | 240 |  |  | 1 |  | 1 | 1 | 1 |  | 1 |  |  | 4 |
| Koré Mairoua | Kouakore | 576 |  |  | 1 |  |  |  |  |  |  | 1 |  |  |
| Koré Mairoua | Kouka Namaizari | 462 |  |  | 1 |  |  |  | 1 |  |  |  |  |  |
| Koré Mairoua | Koukoki | 789 |  |  | 1 |  |  |  | 1 | 1 | 1 |  |  | 3 |
| Koré Mairoua | Loma | 2615 |  |  | 1 |  |  |  | 1 |  | 1 |  |  | 2 |
| Koré Mairoua | Loma Peulh | 310 |  |  | 1 |  |  |  | 1 |  |  |  |  |  |
| Koré Mairoua | Maihérema | 674 |  |  | 1 |  |  | 1 |  |  | 1 |  |  | 2 |
| Koré Mairoua | Maihérema peul | 296 |  |  | 1 |  |  | 1 |  |  | 1 |  |  | 2 |
| Koré Mairoua | Maikalgo | 3426 |  |  | 1 |  |  |  | 1 |  |  |  |  |  |
| Koré Mairoua | Sabon Yaye | 94 |  |  | 1 |  |  |  | 1 |  |  |  |  |  |
| Koré Mairoua | Tombo Magori | 815 |  |  | 1 |  |  |  | 1 |  | 1 |  |  | 2 |
| Koré Mairoua | Toulou Roukouge | 1514 |  |  | 1 |  |  |  | 1 |  | 1 |  |  | 2 |
| Koré Mairoua | Zela | 1392 |  |  | 1 |  |  |  | 1 |  | 1 |  |  | 2 |
| Koygolo | Bangou Kiriey Bella | 438 |  |  | 1 |  |  |  | 1 | 1 |  |  |  | 2 |
| Koygolo | Banizoumbou | 589 |  |  | 1 |  |  |  | 1 |  | 1 |  | 1 | 3 |
| Koygolo | Bouloga Peulh | 234 |  |  | 1 |  |  |  | 1 |  | 1 |  | 1 | 3 |
| Koygolo | Bouloga Zarma | 544 |  |  | 1 |  |  |  | 1 |  | 1 |  | 1 | 3 |
| Koygolo | Deytagui Goubé | 653 |  |  | 1 |  |  |  | 1 |  | 1 | 1 | 1 | 4 |
| Koygolo | Deytagui Sonrai | 284 |  |  | 1 |  |  |  | 1 |  | 1 |  | 1 | 3 |
| Koygolo | Gardi Beri Djerma | 1070 |  |  | 1 |  |  |  |  |  |  |  | 1 |  |
| Koygolo | Gardi Peulh | 187 |  |  | 1 |  |  |  |  |  |  |  | 1 |  |
| Koygolo | Goubezéno | 2640 |  |  | 1 |  |  |  | 1 |  | 1 |  | 1 | 3 |
| Koygolo | Goubezéno Haddi | 121 |  |  | 1 |  |  |  | 1 |  | 1 |  | 1 | 3 |
| Koygolo | Goulbi | 124 |  |  | 1 |  |  |  | 1 | 1 |  |  |  | 2 |
| Koygolo | Karma Zarma | 1916 | 1 |  |  | 1 |  |  |  | 1 |  |  |  |  |
| Koygolo | Karma Zarma | 1916 |  |  | 1 |  |  |  | 1 | 1 |  |  |  | 2 |
| Koygolo | Kobekaina | 145 |  |  | 1 |  |  |  |  |  |  |  | 1 |  |
| Koygolo | Kobékiré | 456 |  |  | 1 |  |  | 1 | 1 |  |  | 1 | 1 | 4 |
| Koygolo | Koberi Bani Koubey | 504 |  |  | 1 |  |  |  |  |  |  |  | 1 |  |
| Koygolo | Koberi Garba | 1028 |  |  | 1 |  |  |  |  |  |  |  | 1 |  |
| Koygolo | Kola Bosseye | 727 |  |  | 1 |  |  |  | 1 | 1 |  |  |  | 2 |
| Koygolo | Koubou Koira Bella | 121 |  |  | 1 |  |  |  |  |  |  |  | 1 |  |
| Koygolo | Koubou Koira Djerma | 426 |  |  | 1 |  |  |  |  |  |  |  | 1 |  |
| Koygolo | Koulou Peulh | 282 |  |  | 1 |  |  |  | 1 | 1 | 1 |  | 1 | 4 |
| Koygolo | Koulou Zerma | 623 |  |  | 1 |  |  |  | 1 | 1 | 1 |  | 1 | 4 |
| Koygolo | Mounbeina | 168 |  |  | 1 |  |  |  |  |  |  |  | 1 |  |
| Koygolo | Pounga | 264 |  |  | 1 |  |  | 1 | 1 |  |  | 1 |  | 3 |
| Koygolo | Safa Doungoumi | 876 |  |  | 1 |  |  |  |  |  |  |  | 1 |  |
| Koygolo | Tadé Peulh | 590 |  |  | 1 |  |  |  | 1 |  | 1 |  | 1 | 3 |
| Koygolo | Tadé Zarma | 850 |  |  | 1 |  |  |  | 1 |  | 1 |  | 1 | 3 |
| Koygolo | Yagarmeye | 204 |  |  | 1 |  |  |  |  |  |  |  | 1 |  |
| Koygolo | Yeda | 1353 |  |  | 1 |  |  |  | 1 | 1 |  |  | 1 | 3 |
| Koygolo | Zouzou Béri | 2501 |  |  | 1 |  |  |  | 1 |  |  | 1 |  | 2 |
| Koygolo | Zouzou Sanay Peulh | 351 |  |  | 1 |  |  |  | 1 |  | 1 |  | 1 | 3 |
| Loga | Abadey | 397 |  |  | 1 |  |  |  |  |  |  |  | 1 |  |
| Loga | Baba Koara | 444 |  |  | 1 |  |  |  |  |  | 1 |  |  |  |
| Loga | Badara dey | 308 |  |  | 1 |  |  |  |  | 1 |  | 1 |  | 2 |
| Loga | Badoka | 1785 |  |  | 1 |  |  |  |  | 1 | 1 |  |  | 2 |
| Loga | Bakir Tombo (Tchire Garbey) | 826 |  |  | 1 |  |  |  |  |  | 1 |  | 1 | 2 |
| Loga | Baziga Gorou | 1085 |  |  | 1 |  |  |  |  |  |  | 1 |  |  |
| Loga | Bouki | 2780 |  |  | 1 |  |  |  |  | 1 | 1 |  |  | 2 |
| Loga | Dagaba Béri | 597 |  |  | 1 |  |  |  |  |  | 1 |  |  |  |
| Loga | Danbazi | 543 |  |  | 1 |  |  |  |  | 1 |  |  |  |  |
| Loga | Dar el sallam | 1403 |  |  | 1 |  |  |  |  |  | 1 | 1 |  | 2 |
| Loga | Darey | 357 |  |  | 1 |  |  |  |  | 1 |  |  |  |  |
| Loga | Dey Tagui Beri | 1207 |  |  | 1 |  |  |  |  | 1 |  |  | 1 | 2 |
| Loga | Diney Béri | 204 |  |  | 1 |  |  |  |  | 1 |  | 1 |  | 2 |
| Loga | Djibo Dey | 879 |  |  | 1 |  |  |  |  |  |  |  | 1 |  |
| Loga | Djokoley | 179 |  |  | 1 |  |  |  |  |  |  | 1 |  |  |
| Loga | Dorodji | 591 |  |  | 1 |  |  |  |  | 1 |  | 1 |  | 2 |
| Loga | Fada 2 | 414 |  |  | 1 |  |  |  |  | 1 |  |  |  |  |
| Loga | Foni Koira | 509 |  |  | 1 |  |  |  |  |  |  |  | 1 |  |
| Loga | Gabikane | 917 |  |  | 1 |  |  |  |  |  |  | 1 |  |  |
| Loga | Garbey Gorou | 682 |  |  | 1 |  |  |  |  |  | 1 | 1 | 1 | 3 |
| Loga | Garssiko | 964 |  |  | 1 |  |  |  |  |  | 1 | 1 |  | 2 |
| Loga | Gassi | 1197 |  |  | 1 |  |  |  |  |  | 1 | 1 |  | 2 |
| Loga | Gonan Dadji | 239 |  |  | 1 |  |  |  |  |  |  | 1 |  |  |
| Loga | Gonga Kaina | 377 |  |  | 1 |  |  |  |  |  | 1 | 1 | 1 | 3 |
| Loga | Gongaizé Koara | 790 |  |  | 1 |  |  |  |  |  | 1 | 1 | 1 | 3 |
| Loga | Gongou Kaina (Koira) | 311 |  |  | 1 |  |  |  |  |  | 1 |  |  |  |
| Loga | Gongou Kooara | 436 |  |  | 1 |  |  |  |  |  |  | 1 |  |  |
| Loga | Gorou Guindé | 529 |  |  | 1 |  |  |  |  |  | 1 | 1 | 1 | 3 |
| Loga | Goubeydey | 445 |  |  | 1 |  |  |  |  |  |  | 1 |  |  |
| Loga | Gounizé | 1926 |  |  | 1 |  |  |  |  |  | 1 | 1 |  | 2 |
| Loga | Guindé Mario | 507 |  |  | 1 |  |  |  |  |  |  | 1 |  |  |
| Loga | Guiri Gorou | 1591 |  |  | 1 |  |  |  |  | 1 | 1 | 1 | 1 | 4 |
| Loga | Hamdallaye | 164 |  |  | 1 |  |  |  |  |  |  | 1 |  |  |
| Loga | Kambadey | 678 |  |  | 1 |  |  |  |  |  |  | 1 | 1 | 2 |
| Loga | Katanga | 1014 |  |  | 1 |  |  |  |  |  |  | 1 | 1 | 2 |
| Loga | Kato Koira | 434 |  |  | 1 |  |  |  |  |  | 1 |  | 1 | 2 |
| Loga | Kibba Adamou | 436 |  |  | 1 |  |  |  |  |  |  | 1 | 1 | 2 |
| Loga | Kibba Tombo | 504 |  |  | 1 |  |  |  |  |  | 1 | 1 | 1 | 3 |
| Loga | Kibba Mallam Kainé | 1296 |  |  | 1 |  |  |  |  |  |  | 1 | 1 | 2 |
| Loga | Kobollo (K. Yamba) | 285 |  |  | 1 |  |  |  |  |  | 1 |  |  |  |
| Loga | Kogorou | 878 |  |  | 1 |  |  |  |  | 1 | 1 |  |  | 2 |
| Loga | Kokirey Modi | 1080 |  |  | 1 |  |  |  |  |  | 1 | 1 | 1 | 3 |
| Loga | Kokirey Peulh | 236 |  |  | 1 |  |  |  |  |  | 1 |  |  |  |
| Loga | Kokorbé | 1473 |  |  | 1 |  |  |  |  |  |  | 1 |  |  |
| Loga | Kossey | 1768 |  |  | 1 |  |  |  |  |  |  | 1 | 1 | 2 |
| Loga | Koubou Bangou Batouré | 618 |  |  | 1 |  |  |  |  |  | 1 | 1 |  | 2 |
| Loga | Koubou bangou Samssou | 462 |  |  | 1 |  |  |  |  |  | 1 | 1 |  | 2 |
| Loga | Kouro 1,2,3,4 | 2319 |  |  | 1 |  |  |  |  |  |  | 1 |  |  |
| Loga | Kouro Beri | 497 |  |  | 1 |  |  |  |  |  |  |  | 1 |  |
| Loga | Kouro Kaina | 491 |  |  | 1 |  |  |  |  |  |  |  | 1 |  |
| Loga | Loga | 6771 |  |  | 1 |  |  |  |  |  | 1 |  | 1 | 2 |
| Loga | Mara Kossey Bangou |  |  |  | 1 |  |  |  |  | 1 |  |  |  |  |
| Loga | Mayaki Koira | 871 |  |  | 1 |  |  |  |  | 1 |  |  |  |  |
| Loga | Nazamne | 1481 |  |  | 1 |  |  |  |  | 1 | 1 |  |  | 2 |
| Loga | Peulh Gandou | 109 |  |  | 1 |  |  |  |  |  | 1 |  |  |  |
| Loga | Sakouara | 545 |  |  | 1 |  |  |  |  |  |  |  | 1 |  |
| Loga | Sekodey | 385 |  |  | 1 |  |  |  |  |  |  |  | 1 |  |
| Loga | Sorko | 830 |  |  | 1 |  |  |  |  |  | 1 |  |  |  |
| Loga | Tara Windi |  | 1 |  |  |  |  |  |  |  | 1 |  |  |  |
| Loga | Tchambou Guindé | 329 |  |  | 1 |  |  |  |  |  | 1 | 1 | 1 | 3 |
| Loga | Tchoulan | 490 |  |  | 1 |  |  |  |  | 1 |  | 1 |  | 2 |
| Loga | Tombo Tamey | 842 |  |  | 1 |  |  |  |  | 1 |  | 1 | 1 | 3 |
| Loga | Wazir Koira | 664 |  |  | 1 |  |  |  |  | 1 |  |  | 1 | 2 |
| Loga | Zonkoto Banda | 660 |  |  | 1 |  |  |  |  | 1 |  |  |  |  |
| Matankari | Amouké | 416 |  |  | 1 |  |  |  |  |  | 1 |  |  |  |
| Matankari | Angoual Kara Doubalma | 467 |  |  | 1 |  | 1 |  |  |  | 1 |  |  | 2 |
| Matankari | Angoual Koadey (Koadaye) | 1027 |  |  | 1 |  | 1 |  |  | 1 | 1 |  |  | 3 |
| Matankari | Bagagi | 1889 | 1 |  |  | 1 |  |  | 1 |  |  |  |  |  |
| Matankari | Bagagi | 1889 |  |  | 1 |  | 1 |  |  |  | 1 | 1 |  | 3 |
| Matankari | Bare Bari | 1188 | 1 |  |  |  |  |  | 1 |  |  |  |  |  |
| Matankari | Bourgouzou |  | 1 |  |  |  |  |  |  |  | 1 |  |  |  |
| Matankari | Carré Roumbouki | 567 |  |  | 1 |  | 1 |  |  |  | 1 |  |  | 2 |
| Matankari | Dan Guere |  | 1 |  |  |  |  |  |  |  | 1 |  |  |  |
| Matankari | Doubalma Guida | 413 |  |  | 1 |  |  |  |  |  | 1 |  |  |  |
| Matankari | Doumé (Doumme) | 774 |  |  | 1 |  |  |  |  | 1 | 1 |  |  | 2 |
| Matankari | Gaouna | 654 | 1 |  |  |  |  |  | 1 |  |  |  |  |  |
| Matankari | Garanga | 1412 | 1 |  |  | 1 |  |  | 1 |  |  |  |  |  |
| Matankari | Garanga | 1412 |  |  | 1 |  | 1 |  |  |  | 1 |  |  | 2 |
| Matankari | Garin Bando | 649 |  |  | 1 |  | 1 |  |  |  | 1 |  |  | 2 |
| Matankari | Garin Gouala | 997 |  |  | 1 |  | 1 |  |  |  | 1 |  |  | 2 |
| Matankari | Guezangna | 1456 |  |  | 1 |  |  |  |  | 1 |  | 1 |  | 2 |
| Matankari | Hountou | 295 | 1 |  |  |  |  |  |  | 1 |  |  |  |  |
| Matankari | Issa Tchichi |  | 1 |  |  |  |  |  |  | 1 |  |  |  |  |
| Matankari | Kasko (K. Peulh) | 304 |  |  | 1 |  | 1 |  |  |  |  |  |  |  |
| Matankari | Kofan Kouka | 337 |  |  | 1 |  |  |  |  |  | 1 | 1 |  | 2 |
| Matankari | Konfata | 268 | 1 |  |  |  |  |  | 1 |  |  |  |  |  |
| Matankari | Koukadim | 478 | 1 |  |  |  |  |  | 1 |  |  |  |  |  |
| Matankari | Koukouki Bouzou | 630 |  |  | 1 |  | 1 |  |  |  |  |  |  |  |
| Matankari | Makera II | 645 | 1 |  |  | 1 |  |  | 1 |  |  |  |  |  |
| Matankari | Makera II | 635 |  |  | 1 |  | 1 |  |  | 1 |  | 1 |  | 3 |
| Matankari | Matankari | 14261 | 1 |  |  | 1 |  |  | 1 | 1 | 1 |  |  | 3 |
| Matankari | Matankari | 14261 |  |  | 1 |  |  |  |  |  |  | 1 |  |  |
| Matankari | Natchira | 270 |  |  | 1 |  | 1 |  |  |  |  |  |  |  |
| Matankari | Roumbouki Doubalma | 329 |  |  | 1 |  |  |  |  |  | 1 |  |  |  |
| Matankari | Roumbouki Lokoyo | 523 |  |  | 1 |  | 1 |  |  |  | 1 |  |  | 2 |
| Matankari | Sabarou | 316 |  |  | 1 |  | 1 |  |  |  | 1 |  |  | 2 |
| Matankari | Salga Sabon Gari | 262 |  |  | 1 |  | 1 |  |  | 1 | 1 | 1 |  | 4 |
| Matankari | Salga Toulli (Salga 1) | 939 |  |  | 1 |  | 1 |  |  | 1 | 1 | 1 |  | 4 |
| Matankari | Tagara | 891 |  |  | 1 |  | 1 |  |  |  | 1 |  |  | 2 |
| Mokko | Babiadey | 1062 |  |  | 1 |  | 1 |  |  |  |  |  |  |  |
| Mokko | Batako | 1791 |  |  | 1 |  | 1 | 1 |  | 1 | 1 | 1 | 1 | 6 |
| Mokko | Dambindi (Dan Bindi) | 711 |  |  | 1 |  | 1 |  |  |  |  |  | 1 | 2 |
| Mokko | Dareki I (Koira Tegui) | 1064 |  |  | 1 |  | 1 | 1 |  | 1 | 1 | 1 | 1 | 6 |
| Mokko | Dareki II | 1679 |  |  | 1 |  | 1 |  |  |  | 1 | 1 |  | 3 |
| Mokko | Diambabadey | 1426 |  |  | 1 |  | 1 |  |  |  |  |  | 1 | 2 |
| Mokko | Doundougonga | 1341 |  |  | 1 |  | 1 | 1 |  | 1 | 1 | 1 | 1 | 6 |
| Mokko | Gabi Koira | 60 |  |  | 1 |  | 1 |  |  |  |  |  | 1 | 2 |
| Mokko | Gonga Karimou | 259 |  |  | 1 |  | 1 |  |  |  |  |  |  |  |
| Mokko | Gonga Moussa | 475 |  |  | 1 |  |  | 1 |  | 1 | 1 | 1 | 1 | 5 |
| Mokko | Gorou Beri Bagna | 739 |  |  | 1 |  | 1 | 1 |  | 1 |  |  |  | 3 |
| Mokko | Goulma Gabi | 1087 |  |  | 1 |  | 1 |  |  |  |  |  |  |  |
| Mokko | Gourou Beri Franc | 381 |  |  | 1 |  | 1 | 1 |  |  |  |  |  | 2 |
| Mokko | Hamka Seyni | 616 |  |  | 1 |  | 1 |  |  |  |  |  |  |  |
| Mokko | Hamka Tombo | 1242 |  |  | 1 |  | 1 |  |  |  |  |  |  |  |
| Mokko | Kattize | 633 |  |  | 1 |  | 1 | 1 |  | 1 |  |  |  | 3 |
| Mokko | Kobe Azia | 804 |  |  | 1 |  | 1 |  |  |  |  |  |  |  |
| Mokko | Kobe Gatari | 780 |  |  | 1 |  | 1 |  |  |  |  |  |  |  |
| Mokko | Kobéri | 914 |  |  | 1 |  | 1 |  |  |  | 1 |  |  | 2 |
| Mokko | Koki Fafa | 489 |  |  | 1 |  | 1 |  |  |  |  |  |  |  |
| Mokko | Koli Bagonga | 1263 |  |  | 1 |  | 1 |  |  |  |  |  |  |  |
| Mokko | Koutoufani | 2345 |  |  | 1 |  | 1 |  |  |  |  |  |  |  |
| Mokko | Mokko | 4447 |  |  | 1 |  | 1 |  |  |  |  | 1 |  | 2 |
| Mokko | Saboudey | 1245 |  |  | 1 |  | 1 |  |  |  |  |  |  |  |
| Mokko | Saney | 749 |  |  | 1 |  | 1 |  |  |  |  |  |  |  |
| Mokko | Sangou | 470 |  |  | 1 |  | 1 | 1 |  | 1 |  |  |  | 3 |
| Mokko | Sina Kouara | 238 |  |  | 1 |  | 1 |  |  |  |  |  |  |  |
| Mokko | Siniguinde | 897 |  |  | 1 |  | 1 |  |  |  | 1 |  |  | 2 |
| Mokko | Soudjeydey | 1268 |  |  | 1 |  | 1 | 1 |  | 1 | 1 | 1 | 1 | 6 |
| Mokko | Takara | 385 |  |  | 1 |  | 1 |  |  |  |  |  | 1 | 2 |
| Mokko | Tchandey | 565 |  |  | 1 |  | 1 |  |  | 1 |  |  |  | 2 |
| Mokko | Tchirobi Dey | 147 |  |  | 1 |  | 1 |  |  |  |  |  |  |  |
| Mokko | Tchoulan | 1485 |  |  | 1 |  | 1 | 1 |  | 1 | 1 |  |  | 4 |
| Mokko | Tibbo Béri | 2487 |  |  | 1 |  | 1 | 1 |  | 1 | 1 |  |  | 4 |
| Mokko | Tokoye Komario | 309 |  |  | 1 |  | 1 |  |  | 1 |  |  |  | 2 |
| Mokko | Tombodjambé | 1567 |  |  | 1 |  | 1 | 1 |  | 1 | 1 |  | 1 | 5 |
| Mokko | Yaouna | 258 |  |  | 1 |  | 1 | 1 |  | 1 |  |  |  | 3 |
| Ngonga | Barbé Peulh | 459 |  |  | 1 |  |  |  |  | 1 |  |  |  |  |
| Ngonga | Boulel Gaouri Modibo | 388 |  |  | 1 |  |  |  |  | 1 |  |  |  |  |
| Ngonga | Diawando | 611 |  |  | 1 |  |  |  |  | 1 |  |  |  |  |
| Ngonga | Doulouwel Djerma | 112 |  |  | 1 |  |  |  |  |  |  | 1 |  |  |
| Ngonga | Doulouwel Peulh | 166 |  |  | 1 |  |  |  |  |  |  | 1 |  |  |
| Ngonga | Gnoumay Kagourou Peulh | 535 |  |  | 1 |  |  |  |  | 1 |  |  |  |  |
| Ngonga | HedaFaraka | 569 |  |  | 1 |  |  |  |  | 1 |  | 1 |  | 2 |
| Ngonga | Kanare | 2447 | 1 |  |  | 1 |  |  | 1 |  |  |  |  |  |
| Ngonga | Kanare | 2447 |  |  | 1 |  |  |  |  | 1 |  | 1 |  | 2 |
| Sakadamna | Bakin Tombo | 1503 |  |  | 1 |  |  |  |  |  | 1 |  |  |  |
| Sakadamna | Bakirikou | 787 |  |  | 1 |  |  |  |  | 1 | 1 |  | 1 | 3 |
| Sakadamna | Bana koara | 1001 |  |  | 1 |  |  |  |  |  |  | 1 |  |  |
| Sakadamna | Bangna Harey | 863 |  |  | 1 |  | 1 | 1 |  | 1 | 1 |  | 1 | 5 |
| Sakadamna | Baro Koira | 908 |  |  | 1 |  |  |  |  |  | 1 |  |  |  |
| Sakadamna | Borgou Sambou | 899 |  |  | 1 |  | 1 |  |  |  | 1 |  |  | 2 |
| Sakadamna | Bozari koara | 147 |  |  | 1 |  |  |  |  |  |  | 1 |  |  |
| Sakadamna | Damana | 151 |  |  | 1 |  |  |  |  |  | 1 |  |  |  |
| Sakadamna | Dantiangou | 615 |  |  | 1 |  | 1 |  |  |  | 1 |  | 1 | 3 |
| Sakadamna | Diney zougou | 114 |  |  | 1 |  |  |  |  |  |  | 1 |  |  |
| Sakadamna | Dinguidi Baro | 1073 |  |  | 1 |  | 1 |  |  |  |  | 1 |  | 2 |
| Sakadamna | Djan Djan Koira | 1541 |  |  | 1 |  |  |  |  |  | 1 |  |  |  |
| Sakadamna | Doko Tombo | 521 |  |  | 1 |  |  | 1 |  |  |  |  | 1 | 2 |
| Sakadamna | Dolé Maourey dey | 350 |  |  | 1 |  |  |  |  | 1 |  | 1 |  | 2 |
| Sakadamna | Gado Koira | 1124 |  |  | 1 |  | 1 |  |  |  | 1 |  | 1 | 3 |
| Sakadamna | Galago Koira | 511 |  |  | 1 |  |  |  |  |  | 1 |  | 1 | 2 |
| Sakadamna | Gombogandé Koara Zeno | 235 |  |  | 1 |  |  |  |  |  | 1 |  |  |  |
| Sakadamna | Gondawal | 194 |  |  | 1 |  |  |  |  |  |  | 1 |  |  |
| Sakadamna | Goubakoye Sirfi | 932 |  |  | 1 |  |  |  |  | 1 |  |  |  |  |
| Sakadamna | Goubekoye Bana | 1366 |  |  | 1 |  |  |  |  |  | 1 |  | 1 | 2 |
| Sakadamna | Goulma Hamani | 789 |  |  | 1 |  |  |  |  |  | 1 |  |  |  |
| Sakadamna | Goulma Kourgueni | 219 |  |  | 1 |  |  |  |  |  | 1 |  |  |  |
| Sakadamna | Goulma Yacouba | 718 |  |  | 1 |  |  |  |  |  | 1 |  |  |  |
| Sakadamna | Gourinsi | 520 |  |  | 1 |  |  |  |  |  | 1 |  |  |  |
| Sakadamna | Haidara Koira | 822 |  |  | 1 |  | 1 |  |  |  | 1 |  |  | 2 |
| Sakadamna | Hamani Tabatt | 608 |  |  | 1 |  |  |  |  | 1 | 1 | 1 | 1 | 4 |
| Sakadamna | Karsani koara | 445 |  |  | 1 |  |  |  |  | 1 | 1 | 1 | 1 | 4 |
| Sakadamna | Koakoré Yamba | 282 |  |  | 1 |  |  |  |  |  |  | 1 |  |  |
| Sakadamna | Koakore Yourmani | 236 |  |  | 1 |  |  |  |  |  | 1 |  |  |  |
| Sakadamna | Kogarbey | 822 |  |  | 1 |  |  |  |  | 1 |  |  |  |  |
| Sakadamna | Kossey | 228 |  |  | 1 |  |  |  |  |  |  |  | 1 |  |
| Sakadamna | Maigounia Koara | 249 |  |  | 1 |  |  |  |  |  | 1 |  |  |  |
| Sakadamna | Maourey Dey Moussa | 460 |  |  | 1 |  |  |  |  |  | 1 |  |  |  |
| Sakadamna | Maourey gorobanda | 137 |  |  | 1 |  |  |  |  |  |  | 1 |  |  |
| Sakadamna | Maourey Sabi | 203 |  |  | 1 |  |  |  |  |  |  | 1 |  |  |
| Sakadamna | Maraké | 383 |  |  | 1 |  | 1 |  |  |  |  |  |  |  |
| Sakadamna | Mokirey Koara | 704 |  |  | 1 |  | 1 |  |  |  | 1 |  | 1 | 3 |
| Sakadamna | Mondoleyze Koara | 1196 |  |  | 1 |  |  |  |  |  | 1 |  |  |  |
| Sakadamna | Mossi koara | 260 |  |  | 1 |  |  |  |  |  |  | 1 |  |  |
| Sakadamna | N'gamou koara | 423 |  |  | 1 |  |  |  |  |  |  | 1 | 1 | 2 |
| Sakadamna | Sabou Koira | 417 |  |  | 1 |  |  |  |  |  | 1 |  |  |  |
| Sakadamna | Sakadamna | 2278 |  |  | 1 |  | 1 |  |  |  | 1 |  | 1 | 3 |
| Sakadamna | Sarkin Daji Koira | 602 |  |  | 1 |  | 1 |  |  |  | 1 |  |  | 2 |
| Sakadamna | Sidi Koira | 672 |  |  | 1 |  | 1 |  |  |  | 1 |  |  | 2 |
| Sakadamna | Soudjedey | 313 |  |  | 1 |  |  |  |  |  |  | 1 |  |  |
| Sakadamna | Talle Adamou | 504 |  |  | 1 |  |  | 1 |  |  |  |  |  |  |
| Sakadamna | Talle Sofo | 885 |  |  | 1 |  |  | 1 |  |  |  |  | 1 | 2 |
| Sakadamna | Tchoulan | 1059 |  |  | 1 |  |  |  |  |  |  | 1 |  |  |
| Sakadamna | Tiouilan Hima | 509 |  |  | 1 |  | 1 |  |  |  | 1 |  | 1 | 3 |
| Sakadamna | Tondigame Alfaga | 704 |  |  | 1 |  |  |  |  |  | 1 |  |  |  |
| Sakadamna | Tondigame Kaninke | 297 |  |  | 1 |  | 1 |  |  |  | 1 |  |  | 2 |
| Sakadamna | Tondigsme Issa | 1105 |  |  | 1 |  |  |  |  |  | 1 |  | 1 | 2 |
| Sakadamna | Tounga Alfagay | 727 |  |  | 1 |  |  |  |  |  |  |  | 1 |  |
| Sakadamna | Zola koara | 125 |  |  | 1 |  |  |  |  |  |  | 1 |  |  |
| Sambéra | Albora Koira | 139 |  |  | 1 | 1 |  |  |  |  |  |  | 1 |  |
| Sambéra | Albora Kouara (Koira) | 139 |  | 1 |  |  |  |  | 1 |  |  |  |  |  |
| Sambéra | Alfa Kouara II | 310 | 1 |  |  |  |  |  | 1 |  |  |  |  |  |
| Sambéra | August Koira | 375 |  |  | 1 |  |  |  |  |  |  |  | 1 |  |
| Sambéra | Bangaga (B. Rimaibe) | 2102 |  | 1 |  |  |  |  | 1 |  |  |  |  |  |
| Sambéra | Foma Tounga | 675 |  | 1 |  |  |  |  | 1 |  |  |  |  |  |
| Sambéra | Gazere Kouara | 388 | 1 |  |  |  |  |  | 1 |  |  |  |  |  |
| Sambéra | Illela | 250 |  | 1 |  |  |  |  | 1 |  |  |  |  |  |
| Sambéra | Kayan Kaina | 885 |  |  | 1 |  |  |  |  |  |  |  | 1 |  |
| Sambéra | Kouassi (K. Dosso) | 680 | 1 |  |  |  |  |  | 1 |  |  |  |  |  |
| Sambéra | Koukada | 175 |  |  | 1 |  | 1 |  |  |  |  |  |  |  |
| Sambéra | Kouloulou | 580 |  |  | 1 |  |  |  |  |  |  |  | 1 |  |
| Sambéra | Larey (Larrey) | 698 |  | 1 |  |  |  |  | 1 |  |  |  |  |  |
| Sambéra | Maikada | 1259 |  |  | 1 |  | 1 |  |  |  |  |  |  |  |
| Sambéra | Ounna | 2855 |  |  | 1 |  |  |  |  |  |  |  | 1 |  |
| Sambéra | Sakou Harou |  | 1 |  |  |  |  |  | 1 |  |  |  |  |  |
| Sambéra | Sambera |  | 1 |  |  |  |  |  | 1 |  |  |  |  |  |
| Sambéra | Sambera (Sambera Zeno) | 2360 | 1 |  |  |  |  |  |  |  | 1 |  |  |  |
| Sambéra | Tilli | 304 |  | 1 |  |  |  |  | 1 |  |  |  |  |  |
| Sambéra | Tounga Elhadji Koira |  | 1 |  |  |  |  |  | 1 |  |  |  |  |  |
| Sokorbé | Bamey | 1872 |  |  | 1 |  |  |  |  | 1 | 1 | 1 | 1 | 4 |
| Sokorbé | Baziga | 2120 |  |  | 1 |  |  |  |  |  |  | 1 |  |  |
| Sokorbé | Dikki | 988 |  |  | 1 |  |  |  |  | 1 |  | 1 |  | 2 |
| Sokorbé | Dourgouma | 569 |  |  | 1 |  |  |  |  |  |  | 1 |  |  |
| Sokorbé | Fandou Sekou Kouara | 1905 |  |  | 1 |  |  |  |  |  | 1 | 1 |  | 2 |
| Sokorbé | Farey Gorou Kaina | 657 |  |  | 1 |  |  |  |  | 1 | 1 | 1 |  | 3 |
| Sokorbé | Goubey | 749 |  |  | 1 |  |  |  |  |  |  | 1 |  |  |
| Sokorbé | Goutoumbou | 879 |  |  | 1 |  |  |  |  | 1 |  | 1 | 1 | 3 |
| Sokorbé | Kalley | 909 |  |  | 1 |  |  |  |  | 1 |  | 1 | 1 | 3 |
| Sokorbé | Kalley Dey Beri | 939 |  |  | 1 |  |  |  |  |  |  | 1 |  |  |
| Sokorbé | Kalley Dey Kaina | 594 |  |  | 1 |  |  |  |  | 1 |  | 1 |  | 2 |
| Sokorbé | Kimia Kouara | 383 |  |  | 1 |  |  |  |  | 1 |  | 1 |  | 2 |
| Sokorbé | Kinney | 146 |  |  | 1 |  |  |  |  |  | 1 | 1 | 1 | 3 |
| Sokorbé | Komdilli Beri | 948 |  |  | 1 |  |  |  |  |  | 1 | 1 |  | 2 |
| Sokorbé | Komdilli Darey | 1298 |  |  | 1 |  |  |  |  |  | 1 | 1 |  | 2 |
| Sokorbé | Madou | 1673 |  |  | 1 |  |  |  |  | 1 |  | 1 |  | 2 |
| Sokorbé | Moussadey Beri | 6742 |  |  | 1 |  |  |  |  |  | 1 | 1 | 1 | 3 |
| Sokorbé | Sinsan Issaka | 455 |  |  | 1 |  |  |  |  |  |  | 1 |  |  |
| Sokorbé | Sinsan Koira Tegui | 352 |  |  | 1 |  |  |  |  |  |  | 1 |  |  |
| Sokorbé | Sinsan Koira Zeno | 600 |  |  | 1 |  |  |  |  |  |  | 1 |  |  |
| Sokorbé | Sokorbe Peulh | 4358 |  |  | 1 |  |  |  |  | 1 | 1 | 1 | 1 | 4 |
| Sokorbé | Wazey (Batchaka) | 500 |  |  | 1 |  |  |  |  |  |  | 1 |  |  |
| Soucoucoutane | Abdou Kessa | 969 |  |  | 1 | 1 |  |  |  | 1 |  |  | 1 | 2 |
| Soucoucoutane | Adoua Kessa | 969 | 1 |  |  |  |  |  |  |  | 1 |  |  |  |
| Soucoucoutane | Ague Dagna | 264 |  |  | 1 |  | 1 |  | 1 |  |  |  |  | 2 |
| Soucoucoutane | Agué Goumoundey | 683 |  |  | 1 |  | 1 |  | 1 |  |  |  |  | 2 |
| Soucoucoutane | Bajiji | 441 |  |  | 1 |  | 1 |  | 1 |  | 1 | 1 |  | 4 |
| Soucoucoutane | Baraya (B. Saydou) | 257 |  |  | 1 |  | 1 |  | 1 |  |  | 1 |  | 3 |
| Soucoucoutane | Birnin Lokoyo Peulh | 397 |  |  | 1 |  | 1 |  |  |  |  | 1 | 1 | 3 |
| Soucoucoutane | Bouzouzou | 230 |  |  | 1 |  | 1 | 1 |  |  |  |  |  | 2 |
| Soucoucoutane | Dan Gari | 861 |  |  | 1 |  | 1 |  |  |  |  |  |  |  |
| Soucoucoutane | Doubalma Illéla | 640 |  |  | 1 |  |  | 1 |  |  | 1 |  |  | 2 |
| Soucoucoutane | Gadirga | 231 |  |  | 1 |  | 1 |  |  |  | 1 |  |  | 2 |
| Soucoucoutane | Gadirga Guida | 1266 |  |  | 1 |  |  |  |  |  |  |  | 1 |  |
| Soucoucoutane | Goubey / Goudey | 512 |  |  | 1 |  |  |  |  |  | 1 | 1 |  | 2 |
| Soucoucoutane | Kantcha 1 | 216 |  |  | 1 |  | 1 |  |  |  |  |  |  |  |
| Soucoucoutane | Kantcha I | 216 |  |  | 1 |  |  |  | 1 |  | 1 | 1 |  | 3 |
| Soucoucoutane | Kantcha II | 93 |  |  | 1 |  |  |  |  |  |  | 1 |  |  |
| Soucoucoutane | Kiada |  | 1 |  |  |  |  |  |  | 1 |  |  |  |  |
| Soucoucoutane | Kiada Goumandey | 534 |  |  | 1 |  |  |  |  |  | 1 |  |  |  |
| Soucoucoutane | Kida Kore (K. Kori Goumandey) | 361 |  |  | 1 |  |  |  |  | 1 | 1 |  |  | 2 |
| Soucoucoutane | Kimassa / Sabara | 237 |  |  | 1 |  | 1 |  |  |  |  |  |  |  |
| Soucoucoutane | Kouassaye | 1110 |  |  | 1 |  | 1 | 1 |  |  |  |  |  | 2 |
| Soucoucoutane | Koundoutou | 100 |  |  | 1 |  |  |  | 1 |  |  |  |  |  |
| Soucoucoutane | Kourouroube (K. Dakaou) | 549 |  |  | 1 |  | 1 |  |  |  | 1 |  |  | 2 |
| Soucoucoutane | Maiguebé | 1636 |  |  | 1 | 1 |  |  | 1 | 1 | 1 |  | 1 | 4 |
| Soucoucoutane | Maiguele (Maiguebe) | 1636 | 1 |  |  |  |  |  |  | 1 |  |  |  |  |
| Soucoucoutane | Makera (Garin Mae Sadié) | 262 |  |  | 1 |  |  | 1 |  |  | 1 |  |  | 2 |
| Soucoucoutane | Marina | 1686 |  |  | 1 |  | 1 | 1 |  | 1 |  | 1 |  | 4 |
| Soucoucoutane | Nassaroua | 2035 |  |  | 1 |  |  | 1 |  |  | 1 |  |  | 2 |
| Soucoucoutane | Niamey (Garin Dari) | 394 |  |  | 1 |  |  |  |  |  |  | 1 |  |  |
| Soucoucoutane | Roumboukawa | 441 |  |  | 1 |  | 1 | 1 |  | 1 |  |  |  | 3 |
| Soucoucoutane | Sabara (S. Mota) | 505 |  |  | 1 |  | 1 | 1 |  | 1 |  |  |  | 3 |
| Soucoucoutane | Sagayé (Tsagayé) | 69 |  |  | 1 |  | 1 |  |  |  |  |  |  |  |
| Soucoucoutane | Sakourou (Sounkourou) | 126 |  |  | 1 |  | 1 |  | 1 |  | 1 |  |  | 3 |
| Soucoucoutane | Soucoucoutane | 4595 |  |  | 1 | 1 |  |  | 1 | 1 | 1 |  |  | 3 |
| Soucoucoutane | Soukoukoutane | 4595 | 1 |  |  |  |  |  |  | 1 |  |  |  |  |
| Soucoucoutane | Tarsossa | 863 |  |  | 1 |  | 1 |  |  |  |  |  | 1 | 2 |
| Soucoucoutane | Toudou Gaoh | 536 |  |  | 1 |  | 1 |  |  |  |  | 1 |  | 2 |
| Soucoucoutane | Toudoun Baouchi | 842 |  |  | 1 |  |  | 1 |  |  | 1 |  | 1 | 3 |
| Soucoucoutane | Toullaye Doubalma | 442 |  |  | 1 |  | 1 | 1 |  |  | 1 |  |  | 3 |
| Soucoucoutane | Tsagae |  | 1 |  |  |  |  |  |  | 1 |  |  |  |  |
| Soucoucoutane | Wadata | 212 |  |  | 1 |  |  |  |  |  | 1 |  |  |  |
| Soucoucoutane | Yamay (Yemeye) | 394 |  |  | 1 |  |  |  |  |  | 1 |  |  |  |
| Tanda | Albakayze | 395 |  | 1 |  | 1 |  |  | 1 |  | 1 |  | 1 | 3 |
| Tanda | Albarkaize | 395 |  |  | 1 |  |  |  |  | 1 |  |  |  |  |
| Tanda | Alfa Gaye Belindé (A.G. Fabangou) | 765 |  |  | 1 |  |  |  |  | 1 |  |  |  |  |
| Tanda | Bangali | 274 |  | 1 |  |  |  |  | 1 |  |  |  |  |  |
| Tanda | Bantali |  |  | 1 |  |  |  |  |  |  | 1 |  | 1 | 2 |
| Tanda | Barfo Kambou |  | 1 |  |  |  |  |  |  |  | 1 |  |  |  |
| Tanda | Barkel |  | 1 |  |  |  |  |  |  |  | 1 |  |  |  |
| Tanda | Darfou Tounga | 411 |  | 1 |  |  |  |  |  |  |  |  | 1 |  |
| Tanda | Ete |  | 1 |  |  |  |  |  |  |  |  |  | 1 |  |
| Tanda | Firchia |  | 1 |  |  |  |  |  | 1 |  |  |  |  |  |
| Tanda | Gaberi |  | 1 |  |  |  |  |  |  |  | 1 |  |  |  |
| Tanda | Garbey |  | 1 |  |  |  |  |  |  |  |  |  | 1 |  |
| Tanda | Gueyoyi (Guayoy 1) | 171 |  | 1 |  |  |  |  | 1 |  |  |  |  |  |
| Tanda | Kelele |  | 1 |  |  |  |  |  |  |  |  |  | 1 |  |
| Tanda | Koikore (Koikoire) | 654 | 1 |  |  |  |  |  |  |  |  |  | 1 |  |
| Tanda | Konwa | 287 |  | 1 |  |  |  |  | 1 |  | 1 |  |  | 2 |
| Tanda | Konza | 793 |  | 1 |  | 1 |  |  | 1 |  | 1 |  |  | 2 |
| Tanda | Konza | 793 |  |  | 1 |  |  |  |  | 1 |  |  |  |  |
| Tanda | Konzatagui |  | 1 |  |  |  |  |  |  |  | 1 |  |  |  |
| Tanda | Korwa |  |  | 1 |  |  |  |  |  |  |  |  | 1 |  |
| Tanda | Kouka Mailamba | 97 | 1 |  |  |  | 1 |  |  |  |  |  |  |  |
| Tanda | Koumbay Kambou |  | 1 |  |  |  |  |  | 1 |  |  |  |  |  |
| Tanda | Koura Tounga |  | 1 |  |  |  |  |  | 1 |  |  |  |  |  |
| Tanda | Kourbey | 394 |  | 1 |  |  |  |  |  |  | 1 |  | 1 | 2 |
| Tanda | Ladan Kouara (Ladan Koira) | 999 | 1 |  |  |  |  |  |  |  |  | 1 |  |  |
| Tanda | Lete Goungou | 899 | 1 |  |  |  |  |  |  |  | 1 |  |  |  |
| Tanda | Lette | 899 |  |  | 1 |  |  |  |  | 1 |  |  |  |  |
| Tanda | Maba Tounga | 201 |  | 1 |  |  |  |  |  |  | 1 |  |  |  |
| Tanda | Magangama | 26 |  | 1 |  |  |  |  | 1 |  |  |  | 1 | 2 |
| Tanda | Mainga Tounga | 252 |  |  | 1 | 1 |  |  |  | 1 |  |  |  |  |
| Tanda | Mairiga Tounga | 252 |  | 1 |  |  |  |  |  |  | 1 |  |  |  |
| Tanda | Monbaye Tounga | 1794 |  | 1 |  |  |  |  | 1 |  | 1 |  |  | 2 |
| Tanda | Mongo Do (Mango Do) | 473 | 1 |  |  |  |  |  |  |  |  |  | 1 |  |
| Tanda | Rounto Tanda | 564 |  | 1 |  |  |  |  | 1 |  | 1 |  | 1 | 3 |
| Tanda | Sia | 3554 | 1 |  |  |  |  |  |  |  |  |  | 1 |  |
| Tanda | Talambou | 368 | 1 |  |  |  |  |  |  |  |  |  | 1 |  |
| Tanda | Tanda | 8098 | 1 |  |  | 1 | 1 |  |  |  |  |  | 1 | 2 |
| Tanda | Tanda | 8098 |  |  | 1 |  |  |  |  | 1 |  |  |  |  |
| Tanda | Tassabonkoyi |  | 1 |  |  |  |  |  |  |  |  |  | 1 |  |
| Tanda | Tchelele | 249 | 1 |  |  |  |  |  |  |  | 1 |  |  |  |
| Tanda | Tchintoua Tounga |  | 1 |  |  |  |  |  | 1 |  | 1 |  |  | 2 |
| Tanda | Tounga Darfou | 411 |  | 1 |  |  |  |  | 1 |  | 1 |  |  | 2 |
| Tanda | Tounga Gombi | 558 |  | 1 |  | 1 |  |  | 1 |  | 1 |  | 1 | 3 |
| Tanda | Tounga Goumbi | 558 |  |  | 1 |  |  |  |  | 1 |  |  |  |  |
| Tanda | Toungan Reni |  | 1 |  |  |  |  |  | 1 |  |  |  |  |  |
| Tanda | Wayakata |  | 1 |  |  |  |  |  | 1 |  |  |  |  |  |
| Tessa | Allassan Dey | 764 | 1 |  |  |  |  |  |  |  |  | 1 |  |  |
| Tessa | Alsana deye | 784 |  |  | 1 |  | 1 | 1 |  |  |  |  | 1 | 3 |
| Tessa | Badingui Koara | 343 |  |  | 1 |  | 1 | 1 |  |  |  |  |  | 2 |
| Tessa | Bakoube | 386 |  |  | 1 |  |  |  |  |  |  |  | 1 |  |
| Tessa | Dey Koukou Ouest (D.K.O. Fand) | 344 | 1 |  |  | 1 |  |  |  |  |  | 1 |  |  |
| Tessa | Dey Koukou Ouest Fand | 344 |  |  | 1 |  |  | 1 |  |  |  |  | 1 | 2 |
| Tessa | Djimba Marounfa | 404 |  |  | 1 |  |  | 1 |  |  |  |  |  |  |
| Tessa | Djobodey | 546 |  |  | 1 |  | 1 | 1 |  |  |  |  |  | 2 |
| Tessa | Falwel Tessa | 994 |  |  | 1 |  |  | 1 |  |  |  |  |  |  |
| Tessa | Farguédi | 605 |  |  | 1 |  | 1 |  |  |  |  |  |  |  |
| Tessa | Gabi Koydeye | 873 |  |  | 1 |  | 1 |  |  |  |  |  | 1 | 2 |
| Tessa | Ganda Koara | 549 |  |  | 1 |  | 1 |  |  |  |  |  | 1 | 2 |
| Tessa | Gourou Kaya | 336 |  |  | 1 |  | 1 | 1 |  |  |  |  |  | 2 |
| Tessa | Kobadeye Tessa | 1569 |  |  | 1 |  |  | 1 |  |  |  |  |  |  |
| Tessa | Koyababa Koara | 953 |  |  | 1 |  | 1 |  |  |  |  |  |  |  |
| Tessa | Leyley Gorou | 723 |  |  | 1 |  | 1 | 1 |  |  |  |  |  | 2 |
| Tessa | Mai Hatchiday |  | 1 |  |  |  |  |  |  |  |  | 1 |  |  |
| Tessa | Marafa Koira | 461 |  |  | 1 |  | 1 | 1 |  |  |  |  |  | 2 |
| Tessa | Mayaki Dey | 751 | 1 |  |  | 1 |  |  |  |  |  | 1 |  |  |
| Tessa | Mayaki Dey | 751 |  |  | 1 |  |  | 1 |  |  |  |  |  |  |
| Tessa | Noma Koira | 931 |  |  | 1 |  | 1 | 1 |  |  |  |  | 1 | 3 |
| Tessa | Satta Koira | 832 |  |  | 1 |  |  | 1 |  |  |  |  |  |  |
| Tessa | Sina Dey | 591 |  |  | 1 |  | 1 |  |  |  |  |  |  |  |
| Tessa | Sinadey | 945 | 1 |  |  |  |  |  |  | 1 |  |  |  |  |
| Tessa | Tessa | 2841 | 1 |  |  |  |  |  |  |  |  | 1 |  |  |
| Tessa | Tessa | 2841 |  |  | 1 |  | 1 |  |  |  |  |  | 1 | 2 |
| Tessa | Tin-Tim | 1014 |  |  | 1 |  | 1 | 1 |  |  |  |  | 1 | 3 |
| Tessa | Tourobon | 858 |  |  | 1 |  |  | 1 |  |  |  |  |  |  |
| Tessa | Wassa Arbi | 85 |  |  | 1 |  | 1 | 1 |  |  |  |  |  | 2 |
| Tibiri | Achalafia | 457 |  |  | 1 |  |  |  |  |  | 1 |  |  |  |
| Tibiri | Afola | 1639 |  |  | 1 |  |  |  | 1 |  |  |  |  |  |
| Tibiri | Angoual Magagi Doka | 648 |  |  | 1 |  |  | 1 |  | 1 |  |  |  | 2 |
| Tibiri | Angoual Marafa | 508 |  |  | 1 |  |  |  |  |  | 1 |  |  |  |
| Tibiri | Angoual Mayaki Fodi | 786 |  |  | 1 |  |  |  |  |  | 1 |  |  |  |
| Tibiri | Angoual Mazouga | 468 |  |  | 1 |  |  |  |  |  | 1 |  |  |  |
| Tibiri | Bangarassa | 2487 |  |  | 1 |  |  |  | 1 |  |  |  |  |  |
| Tibiri | Bankoula | 1730 |  |  | 1 |  |  |  | 1 |  | 1 |  |  | 2 |
| Tibiri | Bechemi | 1361 |  |  | 1 | 1 |  | 1 |  |  |  | 1 |  | 2 |
| Tibiri | Bechimi (Becheme) | 1361 | 1 |  |  |  |  |  |  |  |  | 1 |  |  |
| Tibiri | Binguel | 861 |  |  | 1 |  |  |  |  |  | 1 |  |  |  |
| Tibiri | Binguereta | 707 |  |  | 1 |  |  |  |  |  | 1 |  |  |  |
| Tibiri | Bourgoumawa | 532 |  |  | 1 |  |  |  |  |  | 1 |  |  |  |
| Tibiri | Chakafaché | 469 |  |  | 1 |  |  |  |  |  | 1 |  |  |  |
| Tibiri | Dan Binji | 435 |  |  | 1 |  |  |  |  |  | 1 |  |  |  |
| Tibiri | Djiwaye |  | 1 |  |  |  |  |  |  | 1 |  |  |  |  |
| Tibiri | Dogon Gao (Dan Gao) | 334 |  |  | 1 |  | 1 |  |  |  | 1 |  |  | 2 |
| Tibiri | Fallawa Haoussa | 634 |  |  | 1 |  |  |  |  |  | 1 |  |  |  |
| Tibiri | Garin Malam Abdou | 87 |  |  | 1 |  |  |  | 1 |  |  |  |  |  |
| Tibiri | Gobro (Goboro) | 898 |  |  | 1 |  | 1 |  |  |  | 1 |  |  | 2 |
| Tibiri | Gueraptchi Peul | 128 |  |  | 1 |  |  |  |  | 1 |  |  |  |  |
| Tibiri | Hamdallahi (Hamdalaye) | 353 |  |  | 1 |  |  |  |  |  | 1 |  |  |  |
| Tibiri | Illéla | 562 |  |  | 1 |  |  |  |  |  | 1 |  |  |  |
| Tibiri | Jikata | 341 |  |  | 1 |  |  |  |  |  | 1 |  |  |  |
| Tibiri | Jikata Toudou | 608 |  |  | 1 |  |  |  |  |  | 1 |  |  |  |
| Tibiri | Kadidi | 1734 |  |  | 1 |  |  |  |  |  | 1 |  |  |  |
| Tibiri | Kalgo | 457 |  |  | 1 |  |  |  |  |  | 1 |  |  |  |
| Tibiri | Kallawa Lahillawa | 595 |  |  | 1 |  | 1 | 1 |  | 1 | 1 |  |  | 4 |
| Tibiri | Kolla Faria | 141 |  |  | 1 |  |  |  |  |  | 1 |  |  |  |
| Tibiri | Kolla Gobirawa | 735 |  |  | 1 |  |  |  |  |  | 1 |  |  |  |
| Tibiri | Kolla Mallam | 139 |  |  | 1 |  |  |  |  |  | 1 |  |  |  |
| Tibiri | Kolla Zingui | 528 |  |  | 1 |  |  |  |  |  | 1 |  |  |  |
| Tibiri | Kore Bechemi | 402 |  |  | 1 |  |  | 1 |  |  |  |  |  |  |
| Tibiri | Kouka | 648 | 1 |  |  | 1 |  |  |  |  | 1 |  |  |  |
| Tibiri | Kouka | 648 |  |  | 1 |  | 1 | 1 |  | 1 | 1 |  |  | 4 |
| Tibiri | Koundou Koundou | 276 |  |  | 1 |  |  | 1 |  | 1 | 1 |  |  | 3 |
| Tibiri | Made | 2142 |  |  | 1 |  | 1 |  |  |  |  |  |  |  |
| Tibiri | Madobia | 113 |  |  | 1 |  | 1 |  |  | 1 | 1 |  |  | 3 |
| Tibiri | Madotchi Gueraptchi | 1194 |  |  | 1 |  | 1 |  |  |  |  |  |  |  |
| Tibiri | Mage (M. Dan Izori) | 299 |  |  | 1 |  |  |  |  |  | 1 |  |  |  |
| Tibiri | Makera | 634 |  |  | 1 |  |  |  |  |  | 1 |  |  |  |
| Tibiri | Mallamawa | 202 |  |  | 1 |  |  |  | 1 |  |  |  |  |  |
| Tibiri | Nassarawa | 2597 | 1 |  |  | 1 |  |  |  | 1 |  |  |  |  |
| Tibiri | Nassarawa | 2597 |  |  | 1 |  |  |  | 1 |  |  |  |  |  |
| Tibiri | Sakari | 618 |  |  | 1 |  |  |  |  | 1 |  |  |  |  |
| Tibiri | Salkam | 1620 |  |  | 1 |  |  |  |  |  | 1 |  |  |  |
| Tibiri | Sarmakoye | 656 |  |  | 1 |  |  | 1 |  |  |  |  |  |  |
| Tibiri | Taramna | 707 |  |  | 1 |  |  |  |  |  | 1 |  |  |  |
| Tibiri | Tibiri | 6430 | 1 |  |  | 1 |  |  |  | 1 |  |  |  |  |
| Tibiri | Tibiri | 6430 |  |  | 1 |  | 1 |  |  |  |  |  |  |  |
| Tibiri | Tombo Boya | 1712 |  |  | 1 |  |  |  |  |  |  | 1 |  |  |
| Tibiri | Tombo Chiffa | 579 |  |  | 1 | 1 |  |  |  |  |  | 1 |  |  |
| Tibiri | Tombo Tchiffa | 579 | 1 |  |  |  |  |  |  |  |  | 1 |  |  |
| Tibiri | Tombon Bouya | 1712 | 1 |  |  |  |  |  |  |  |  | 1 |  |  |
| Tibiri | Toudoun Mori | 615 |  |  | 1 |  |  |  | 1 |  |  |  |  |  |
| Tibiri | Tounga Ibrahim | 1422 |  |  | 1 |  |  |  | 1 |  | 1 |  |  | 2 |
| Tibiri | Tounga Maibaza | 196 |  |  | 1 |  | 1 |  |  |  |  |  |  |  |
| Tibiri | Tounga Son Allah | 491 |  |  | 1 |  |  | 1 |  | 1 | 1 |  |  | 3 |
| Tibiri | Yarourou | 985 |  |  | 1 |  |  |  |  |  | 1 |  |  |  |
| Tombo Koirey I | Alfa Koira | 1169 |  |  | 1 |  |  |  |  |  | 1 |  |  |  |
| Tombo Koirey I | Almou Koara | 499 |  |  | 1 |  | 1 | 1 |  |  | 1 |  |  | 3 |
| Tombo Koirey I | Bangou Fada Rouzou | 1137 |  |  | 1 |  |  | 1 |  |  | 1 |  |  | 2 |
| Tombo Koirey I | Bangou Fada Siddo | 1483 |  |  | 1 |  |  | 1 |  |  | 1 |  |  | 2 |
| Tombo Koirey I | Banidey | 974 |  |  | 1 |  |  |  |  | 1 |  |  | 1 | 2 |
| Tombo Koirey I | Bawabéri (Baouabéri) | 1336 |  |  | 1 |  |  |  |  |  | 1 | 1 |  | 2 |
| Tombo Koirey I | Bawadey | 897 |  |  | 1 |  |  |  |  | 1 |  | 1 | 1 | 3 |
| Tombo Koirey I | Bongou Fada Rouzou | 1137 |  |  | 1 |  | 1 | 1 |  |  |  |  |  | 2 |
| Tombo Koirey I | Boroyzédey | 1108 |  |  | 1 |  |  |  |  |  |  | 1 |  |  |
| Tombo Koirey I | Bossey | 222 |  |  | 1 |  | 1 |  |  | 1 | 1 | 1 |  | 4 |
| Tombo Koirey I | Ct Tourou Tourou (TT Peulh) | 49 |  |  | 1 |  | 1 |  |  |  | 1 |  |  | 2 |
| Tombo Koirey I | Elhadji Dey | 784 |  |  | 1 |  | 1 | 1 |  |  | 1 |  | 1 | 4 |
| Tombo Koirey I | Fandoubon Tombo | 1166 |  |  | 1 |  | 1 | 1 |  |  | 1 |  | 1 | 4 |
| Tombo Koirey I | Gaya-Dey | 437 |  |  | 1 |  | 1 | 1 |  |  |  |  |  | 2 |
| Tombo Koirey I | Goubey Dey | 342 |  |  | 1 |  |  |  |  |  |  |  | 1 |  |
| Tombo Koirey I | Halidou Koara | 385 |  |  | 1 |  | 1 |  |  |  | 1 | 1 | 1 | 4 |
| Tombo Koirey I | Marafadey | 1108 |  |  | 1 |  |  |  |  |  | 1 |  |  |  |
| Tombo Koirey I | Mirrizam | 862 |  |  | 1 |  | 1 | 1 |  |  | 1 |  |  | 3 |
| Tombo Koirey I | Moribane | 306 |  |  | 1 |  |  |  |  |  |  |  | 1 |  |
| Tombo Koirey I | Sakari Koira | 939 |  |  | 1 |  | 1 |  |  |  | 1 |  |  | 2 |
| Tombo Koirey I | Soja Dey Bossey | 288 |  |  | 1 |  |  |  |  |  |  |  | 1 |  |
| Tombo Koirey I | Tallé Guindé | 572 |  |  | 1 |  |  |  |  | 1 |  |  | 1 | 2 |
| Tombo Koirey I | Tombo Koirey Souley |  |  |  | 1 |  |  |  |  |  | 1 |  |  |  |
| Tombo Koirey I | Tombo koirey Yérima | 2600 |  |  | 1 |  |  |  |  |  |  | 1 |  |  |
| Tombo Koirey I | Tombo Kouarey Yerima (Tomboireyi) | 3792 | 1 |  |  |  |  |  |  |  | 1 |  |  |  |
| Tombo Koirey I | Tourou Tourou Koara | 860 |  |  | 1 |  | 1 |  |  |  | 1 |  |  | 2 |
| Tombo Koirey I | Wadouka | 17 |  |  | 1 |  |  | 1 |  |  |  |  |  |  |
| Tombo Koirey I | Wanga Kaina | 912 |  |  | 1 |  | 1 |  |  |  |  | 1 | 1 | 3 |
| Tombo Koirey I | Youlwa | 360 |  |  | 1 |  |  |  |  |  |  | 1 |  |  |
| Tombo Koirey I | Zango Koara | 987 |  |  | 1 |  |  |  |  | 1 | 1 |  |  | 2 |
| Tounouga | Banizoumbou Madargueyo | 486 | 1 |  |  |  |  |  |  |  | 1 |  |  |  |
| Tounouga | Boune Boune | 419 | 1 |  |  | 1 |  |  |  |  | 1 |  |  |  |
| Tounouga | Boune-Boune | 419 |  |  | 1 |  |  |  |  | 1 |  |  |  |  |
| Tounouga | Dole | 3325 |  | 1 |  |  |  |  |  |  | 1 |  | 1 | 2 |
| Tounouga | Gatawani Beri | 2159 |  | 1 |  | 1 |  |  |  |  | 1 |  |  |  |
| Tounouga | Gatawani Beri | 2159 |  |  | 1 |  |  |  |  | 1 |  |  |  |  |
| Tounouga | Gatawani Kaina | 2871 |  |  | 1 | 1 |  |  |  | 1 |  |  |  |  |
| Tounouga | Gatawani Kaina (Tounga CH) | 2871 |  | 1 |  |  |  |  |  |  | 1 |  |  |  |
| Tounouga | Gondorou (Gondarou) | 1696 | 1 |  |  |  |  |  |  |  | 1 |  |  |  |
| Tounouga | Goron Kondo | 939 | 1 |  |  |  |  |  |  |  | 1 |  | 1 | 2 |
| Tounouga | Guehedi | 428 |  |  | 1 |  |  |  |  | 1 |  |  |  |  |
| Tounouga | Idi Koira | 295 |  |  | 1 |  |  |  |  | 1 |  |  |  |  |
| Tounouga | Koma | 594 | 1 |  |  | 1 |  |  |  |  | 1 |  | 1 | 2 |
| Tounouga | Koma | 594 |  |  | 1 |  |  |  |  | 1 |  |  |  |  |
| Tounouga | Kouriva |  | 1 |  |  |  |  |  |  |  |  |  | 1 |  |
| Tounouga | Rountawa |  | 1 |  |  |  |  |  |  |  |  |  | 1 |  |
| Tounouga | Rountoua Gattawani | 383 | 1 |  |  |  |  |  |  |  | 1 |  |  |  |
| Tounouga | Rountoua Lagaré |  | 1 |  |  |  |  |  |  |  | 1 |  |  |  |
| Tounouga | Rountouan Gatawani | 383 |  |  | 1 |  |  |  |  | 1 |  |  |  |  |
| Tounouga | Sabon Birni | 5970 | 1 |  |  | 1 |  |  |  |  | 1 |  |  |  |
| Tounouga | Sabon Birni | 5970 |  |  | 1 |  |  |  |  | 1 |  |  |  |  |
| Tounouga | Tahirou Tounga | 515 | 1 |  |  |  |  |  |  |  |  |  | 1 |  |
| Tounouga | Tounga (Tounoua) | 8296 | 1 |  |  |  |  |  |  |  | 1 |  | 1 | 2 |
| Tounouga | Tounga Dan Moussa |  | 1 |  |  |  |  |  |  |  | 1 |  |  |  |
| Tounouga | Tounga Djado | 296 | 1 |  |  |  |  |  |  |  | 1 |  | 1 | 2 |
| Tounouga | Tounga Mayara | 873 |  |  | 1 |  |  |  |  | 1 |  |  |  |  |
| Tounouga | Tounga Zanoua |  | 1 |  |  | 1 |  |  |  |  |  |  | 1 |  |
| Tounouga | Tounga Zanoua | 163 |  |  | 1 |  |  |  |  | 1 |  |  |  |  |
| Tounouga | Toungan Zanoua (Tounga Zanoua) | 163 | 1 |  |  |  |  |  |  |  | 1 |  |  |  |
| Tounouga | Tounouga | 8296 |  |  | 1 |  |  |  |  | 1 |  |  |  |  |
| Yelou | Adiga Lele | 1582 | 1 |  |  |  |  |  |  |  |  | 1 |  |  |
| Yelou | Agemouraba (Adje Mouraba) | 230 | 1 |  |  |  |  |  |  |  |  | 1 |  |  |
| Yelou | Albaraka Koira 1 | 231 |  |  | 1 |  |  | 1 |  |  |  |  |  |  |
| Yelou | Bani Koubeye | 1177 |  |  | 1 | 1 |  |  | 1 |  |  |  |  |  |
| Yelou | Bani Koubaye | 1177 | 1 |  |  |  |  |  |  |  |  |  | 1 |  |
| Yelou | Banizoumbou Guida | 219 |  |  | 1 |  |  | 1 |  |  |  |  |  |  |
| Yelou | Bara | 288 |  |  | 1 |  |  |  |  | 1 |  |  |  |  |
| Yelou | Dagnakou | 284 |  |  | 1 | 1 |  | 1 |  |  |  |  |  |  |
| Yelou | Dangnakou | 284 | 1 |  |  |  |  |  |  |  |  |  | 1 |  |
| Yelou | Damana | 460 | 1 |  |  |  |  |  |  |  |  |  | 1 |  |
| Yelou | Garin Bourtou | 470 |  |  | 1 |  |  |  |  | 1 |  |  |  |  |
| Yelou | Garin Goni 1 | 638 |  |  | 1 |  |  |  | 1 |  |  |  |  |  |
| Yelou | Garin Hamani | 713 |  |  | 1 |  |  |  |  | 1 |  |  |  |  |
| Yelou | Garin Massou Gogue |  | 1 |  |  |  |  |  |  |  |  | 1 |  |  |
| Yelou | Goumki Arzika | 833 |  |  | 1 |  |  |  |  | 1 |  |  |  |  |
| Yelou | Hangoua Sani |  | 1 |  |  |  |  |  |  |  |  |  | 1 |  |
| Yelou | Illela 1 | 538 |  |  | 1 |  |  |  |  | 1 |  |  |  |  |
| Yelou | Illela 2 | 428 |  |  | 1 |  |  |  |  | 1 |  |  |  |  |
| Yelou | Illela Makera |  | 1 |  |  |  |  |  |  |  |  | 1 |  |  |
| Yelou | Imbotche (Nbotche) | 810 |  |  | 1 |  |  | 1 |  |  |  |  |  |  |
| Yelou | Kahel | 1036 |  |  | 1 |  |  | 1 |  |  |  |  |  |  |
| Yelou | Kawara Dede | 3132 | 1 |  |  | 1 |  |  |  |  |  |  | 1 |  |
| Yelou | Kawara N'Debe | 3132 |  |  | 1 |  |  |  | 1 | 1 |  |  |  | 2 |
| Yelou | Kawara Gohe | 1266 | 1 |  |  |  |  |  |  |  |  |  | 1 |  |
| Yelou | Kawaran N'Gohe | 1266 |  |  | 1 |  |  |  | 1 | 1 |  |  |  | 2 |
| Yelou | Lambou | 292 |  |  | 1 |  |  |  |  | 1 |  |  |  |  |
| Yelou | Lasson Beidou | 729 | 1 |  |  |  |  |  |  |  |  |  | 1 |  |
| Yelou | Malgorou | 5115 | 1 |  |  | 1 |  |  |  |  |  |  | 1 |  |
| Yelou | Malgourou | 5115 |  |  | 1 |  |  | 1 |  |  |  |  |  |  |
| Yelou | Marmaro | 216 |  |  | 1 |  |  |  |  | 1 |  |  |  |  |
| Yelou | Motto | 339 | 1 |  |  |  |  |  |  |  |  |  | 1 |  |
| Yelou | Sabon Gari Foga | 1122 |  |  | 1 |  |  |  |  | 1 |  |  |  |  |
| Yelou | Sormo | 901 | 1 |  |  | 1 |  |  |  |  |  |  | 1 |  |
| Yelou | Sormo | 901 |  |  | 1 |  |  | 1 |  |  |  |  |  |  |
| Yelou | Tanagaye | 1092 |  |  | 1 |  |  |  | 1 |  |  |  |  |  |
| Yelou | Tela | 305 |  |  | 1 |  |  |  | 1 |  |  |  |  |  |
| Yelou | Tounga Lelle (T. Lele) | 156 | 1 |  |  |  |  |  |  |  |  | 1 |  |  |
| Yelou | Toussey (Tousseye) | 331 | 1 |  |  | 1 |  |  |  |  |  |  | 1 |  |
| Yelou | Tousseye | 331 |  |  | 1 |  |  |  | 1 |  |  |  |  |  |
| Yelou | Wandie Baba Koira | 401 |  |  | 1 |  |  |  |  | 1 |  |  |  |  |
| Yelou | Yelou | 3407 | 1 |  |  | 1 |  |  |  |  |  |  | 1 |  |
| Yelou | Yelou | 3407 |  |  | 1 |  |  | 1 |  | 1 |  |  |  | 2 |
| Yelou | Zonzono (Zanzano) | 499 | 1 |  |  |  |  |  |  |  |  |  | 1 |  |
| Zabori | Angoal Tourba | 506 |  |  | 1 |  |  |  |  |  | 1 |  |  |  |
| Zabori | Balle | 250 |  |  | 1 |  |  |  |  |  | 1 | 1 |  | 2 |
| Zabori | Bambaro | 161 |  |  | 1 |  |  |  |  |  | 1 | 1 |  | 2 |
| Zabori | Bouma | 230 |  |  | 1 |  |  |  |  |  |  | 1 |  |  |
| Zabori | Djamboujeré | 270 |  |  | 1 |  |  |  |  |  |  | 1 |  |  |
| Zabori | Farin Doutchi | 205 |  |  | 1 |  |  |  |  |  | 1 | 1 |  | 2 |
| Zabori | Garin Gawassa | 220 |  |  | 1 |  |  |  |  |  | 1 | 1 |  | 2 |
| Zabori | Garin Sama | 242 |  |  | 1 |  |  |  |  |  | 1 | 1 |  | 2 |
| Zabori | Hamadiré | 336 |  |  | 1 |  |  |  |  |  | 1 | 1 |  | 2 |
| Zabori | Kassadabi | 530 |  |  | 1 |  |  |  |  |  |  | 1 |  |  |
| Zabori | Sabon Rigia (Peulh+Bodore) | 1121 |  |  | 1 |  |  |  |  |  | 1 |  |  |  |
| Zabori | Sagadé | 110 |  |  | 1 |  |  |  |  |  | 1 | 1 |  | 2 |
| Zabori | Tchiwatché | 357 |  |  | 1 |  |  |  |  |  | 1 |  |  |  |
| Zabori | Tribu Djamboujéri | 230 |  |  | 1 |  |  |  |  |  | 1 | 1 |  | 2 |
| Zabori | Zabori | 1160 |  |  | 1 |  |  |  |  |  | 1 | 1 |  | 2 |
| SUM |  |  | 277 | 36 | 1179 |  | 316 | 837 | 284 | 377 | 555 | 1054 | 318 | 606 |

Abbreviations: Ct Campement, D Drought, P Population, PF Pluvial flood, QT Quartier (neighborhood), RF River flood
