# Supplementary material
Source: MDPI journal article supplement (https://www.mdpi.com/2225-1154/6/3/67)
Supplement: s1 [file s1 › Tiepolo & al-Supplementarty Material Table 2S-english-changes.pdf]

## Supplementary Materials: Multi-hazard Risk Assessment for Planning with Climate in the Dosso Region, Niger

Maurizio Tiepolo, Maurizio Bacci, Sarah Braccio

**Table S2.** Disaster frequency in the Dosso region (Niger) according municipality and settlement, 2011–2017

| Municipality   | Settlement           | P <sub>2012</sub> | Disaster category |    |   |       | Disaster year |      |      |      |      |      |      | Disaster<br>n. >1 |
|----------------|----------------------|-------------------|-------------------|----|---|-------|---------------|------|------|------|------|------|------|-------------------|
|                |                      |                   | PF                | RF | D | Multi | 2011          | 2012 | 2013 | 2014 | 2015 | 2016 | 2017 |                   |
| Bana           | Bana                 | 3922              | 1                 |    |   | 1     | 1             |      |      |      |      |      | 1    | 2                 |
| Bana           | Bana                 | 3922              |                   |    | 1 |       |               |      |      | 1    |      |      |      |                   |
| Bana           | Bizoungou (Bezougou) | 308               | 1                 |    |   |       |               |      |      |      |      |      | 1    |                   |
| Bana           | Dogan Dadi           | 220               |                   |    | 1 | 1     |               |      | 1    | 1    |      |      |      | 2                 |
| Bana           | Dogon Dagi           | 220               | 1                 |    |   |       |               |      |      |      |      |      | 1    |                   |
| Bana           | Faska                | 1534              | 1                 |    |   | 1     |               |      |      |      |      |      | 1    |                   |
| Bana           | Faska                | 1534              |                   |    | 1 |       |               |      | 1    | 1    |      |      | 1    | 3                 |
| Bana           | Garin Maikabi        | 206               | 1                 |    |   |       |               |      |      |      |      |      | 1    |                   |
| Bana           | Hankoura             | 1609              | 1                 |    |   | 1     |               |      |      |      |      |      | 1    |                   |
| Bana           | Hankoura             | 1609              |                   |    | 1 |       |               |      | 1    | 1    |      |      | 1    | 3                 |
| Bana           | Illela II            | 152               | 1                 |    |   |       |               |      |      |      |      |      | 1    |                   |
| Bana           | Kantalangou          | 158               | 1                 |    |   |       |               |      |      |      |      |      | 1    |                   |
| Bana           | Kote Kote            | 597               | 1                 |    |   | 1     |               |      |      |      |      |      | 1    |                   |
| Bana           | Koté Koté            | 597               |                   |    | 1 |       |               |      | 1    | 1    |      |      |      | 2                 |
| Bana           | Machaya              | 189               | 1                 |    |   |       |               |      |      |      |      |      | 1    |                   |
| Bana           | Malam Kadi           | 828               | 1                 |    |   | 1     |               |      |      |      |      |      | 1    |                   |
| Bana           | Mallam Kadi          | 828               |                   |    | 1 |       |               |      | 1    | 1    |      |      | 1    | 3                 |
| Bana           | Masama               | 288               | 1                 |    |   |       |               |      |      |      |      |      | 1    |                   |
| Bana           | Niakoye Tonga        | 3081              |                   |    | 1 | 1     |               |      | 1    | 1    |      |      |      | 2                 |
| Bana           | Niyakoye Tounga      | 3081              | 1                 |    |   |       |               |      |      |      |      |      | 1    |                   |
| Bana           | Tondi Hinza          | 368               |                   |    | 1 |       |               |      | 1    | 1    |      |      | 1    | 3                 |
| Bana           | Toudou Wada          | 250               |                   |    | 1 | 1     |               |      | 1    | 1    |      |      |      | 2                 |
| Bana           | Toudoun Wada         | 250               | 1                 |    |   |       |               |      |      |      |      |      | 1    |                   |
| Bana           | Tounga Tegui         | 1324              |                   |    | 1 | 1     |               |      | 1    | 1    |      |      |      | 2                 |
| Bana           | Tounouga Tegui       | 1324              | 1                 |    |   |       |               |      |      |      |      |      | 1    |                   |
| Bengou         | Bengou               | 12329             | 1                 |    |   | 1     | 1             | 1    |      |      |      |      | 1    | 3                 |
| Bengou         | Bengou               | 12329             |                   |    | 1 |       |               |      |      | 1    |      |      |      |                   |
| Bengou         | Borin Yaki           |                   | 1                 |    |   |       |               |      |      |      |      |      | 1    |                   |
| Bengou         | Garin Malam          | 600               | 1                 |    |   |       |               |      |      |      |      |      | 1    |                   |
| Bengou         | Guiwa (Gouiwa CPR)   | 296               | 1                 |    |   |       |               |      |      |      |      |      | 1    |                   |
| Bengou         | Hamdallaye           | 248               | 1                 |    |   |       |               |      |      |      |      |      | 1    |                   |
| Bengou         | Korefade             |                   | 1                 |    |   |       |               |      |      |      |      |      | 1    |                   |
| Bengou         | Niakoyi              |                   | 1                 |    |   |       |               |      |      |      |      |      | 1    |                   |
| Birmi N'Gaoure | Batemberi            | 1276              |                   |    | 1 |       |               |      |      |      |      | 1    |      |                   |
| Birmi N'Gaoure | Boula Gaouri Peulh   | 259               |                   |    | 1 |       |               |      |      |      |      | 1    |      |                   |
| Birmi N'Gaoure | Boula Oula           | 141               |                   |    | 1 |       |               |      |      |      |      | 1    |      |                   |
| Birmi N'Gaoure | Boundou Koukoye      | 308               |                   |    | 1 |       |               |      |      |      |      | 1    |      |                   |
| Birmi N'Gaoure | Dobaga               | 1086              |                   |    | 1 |       |               |      |      | 1    |      | 1    |      | 2                 |
| Birmi N'Gaoure | Dounoudibi Peulh     | 268               |                   |    | 1 |       |               |      |      |      |      | 1    |      |                   |
| Birmi N'Gaoure | Dounoudibi Zarma     | 776               |                   |    | 1 |       |               |      |      |      |      | 1    |      |                   |
| Birmi N'Gaoure | Garou Peul           | 683               |                   |    | 1 |       |               |      |      | 1    |      | 1    |      | 2                 |
| Birmi N'Gaoure | Garou Zarma          | 684               |                   |    | 1 |       |               |      |      | 1    |      | 1    |      | 2                 |
| Birmi N'Gaoure | Haoulawal Djerma     | 764               |                   |    | 1 |       |               |      |      | 1    |      | 1    |      | 2                 |
| Birmi N'Gaoure | Haoulawal Peulh      | 329               |                   |    | 1 |       |               |      |      |      |      | 1    |      |                   |
| Birmi N'Gaoure | Kaba Karba           | 77                |                   |    | 1 |       |               |      |      |      |      | 1    |      |                   |
| Birmi N'Gaoure | Karra                | 3115              |                   |    | 1 |       |               |      |      | 1    |      | 1    |      | 2                 |
| Birmi N'Gaoure | Kofo                 | 404               |                   |    | 1 |       |               |      |      | 1    |      |      |      |                   |
| Birmi N'Gaoure | Kourfaré             | 1262              |                   |    | 1 |       |               |      |      | 1    |      | 1    |      | 2                 |
| Birmi N'Gaoure | Menné                | 324               |                   |    | 1 |       |               |      |      |      |      | 1    |      |                   |
| Birmi N'Gaoure | Sakirey Peulh        | 179               |                   |    | 1 |       |               |      |      |      |      | 1    |      |                   |
| Birmi N'Gaoure | Sakirey Peulh Zarma  | 395               |                   |    | 1 |       |               |      |      |      |      | 1    |      |                   |
| Birmi N'Gaoure | Setti                | 422               |                   |    | 1 |       |               |      |      |      |      | 1    |      |                   |
| Birmi N'Gaoure | Sillia               | 296               |                   |    | 1 |       |               |      |      |      |      | 1    |      |                   |
| Birmi N'Gaoure | Tchéringui           | 294               |                   |    | 1 |       |               |      |      | 1    |      | 1    |      | 2                 |

## Climate 2018

|                |                          |      |   |   |   |   |       |
|----------------|--------------------------|------|---|---|---|---|-------|
| Birni N'Gaoure | Tcheygao                 | 492  | 1 |   |   | 1 |       |
| Birni N'Gaoure | Walatonou                | 327  | 1 |   |   | 1 |       |
| Birni N'Gaoure | Windé                    | 365  | 1 |   |   | 1 |       |
| Birni N'Gaoure | Donoudibi Djerma         | 776  | 1 |   |   | 1 |       |
| Birni N'Gaoure | Karra                    | 3115 | 1 |   |   | 1 |       |
| Birni N'Gaoure | Kiota                    |      | 1 |   |   | 1 |       |
| Dan Kassari    | Bawada Guida             | 549  | 1 |   |   | 1 |       |
| Dan Kassari    | Dan Kassari              | 3874 | 1 |   |   | 1 |       |
| Dan Kassari    | Gouba                    |      | 1 |   |   | 1 |       |
| Dan Kassari    | Goudi                    |      | 1 |   |   | 1 |       |
| Dankassari     | Askia                    | 670  | 1 | 1 | 1 |   | 2     |
| Dankassari     | Bare Bari                | 999  | 1 |   |   | 1 |       |
| Dankassari     | Bawada Dagi              | 2103 | 1 |   |   | 1 | 1 2   |
| Dankassari     | Bawada Guida             | 549  | 1 | 1 |   | 1 | 2     |
| Dankassari     | Chanono                  | 1400 | 1 | 1 |   | 1 | 1 3   |
| Dankassari     | Dankassari               | 4559 | 1 |   | 1 | 1 | 1 3   |
| Dankassari     | Darey Gougui             | 69   | 1 | 1 |   | 1 | 2     |
| Dankassari     | Dogontapki               | 4407 | 1 |   |   | 1 | 1 1 3 |
| Dankassari     | Douzou                   | 304  | 1 |   |   |   | 1     |
| Dankassari     | Fanna I                  | 372  | 1 | 1 |   |   | 1 2   |
| Dankassari     | Garin Agour              | 279  | 1 |   |   |   | 1     |
| Dankassari     | Garin Mayodo             | 195  | 1 |   |   | 1 |       |
| Dankassari     | Gofawa                   | 1054 | 1 |   |   | 1 | 1 2   |
| Dankassari     | Goho                     | 1041 | 1 |   | 1 | 1 | 2     |
| Dankassari     | Goubey                   | 2528 | 1 |   |   | 1 | 1 2   |
| Dankassari     | Goulbi                   | 1196 | 1 |   |   | 1 | 1 2   |
| Dankassari     | Guizara                  | 157  | 1 |   |   | 1 | 1 2   |
| Dankassari     | Jarkassa                 | 454  | 1 | 1 |   | 1 | 1 3   |
| Dankassari     | Kadandamé                | 1671 | 1 | 1 |   | 1 | 2     |
| Dankassari     | Kamrey I (Kamrey Arawa)  | 964  | 1 |   |   | 1 | 1 2   |
| Dankassari     | Kamrey II (Kamrey Sanke) | 906  | 1 |   |   |   | 1     |
| Dankassari     | Kaoura Lahama            | 707  | 1 | 1 |   |   |       |
| Dankassari     | Kargui Mallan            | 2712 | 1 |   |   |   | 1     |
| Dankassari     | Karki (K. Malan)         | 2961 | 1 | 1 | 1 | 1 | 3     |
| Dankassari     | Karki Peulh              | 408  | 1 |   | 1 |   | 1 2   |
| Dankassari     | Kolmey                   | 927  | 1 | 1 |   | 1 | 1 3   |
| Dankassari     | Kore Gabass              | 839  | 1 |   |   | 1 |       |
| Dankassari     | Korongome                | 970  | 1 |   |   | 1 | 1 2   |
| Dankassari     | Korongomey Peulh         | 459  | 1 |   |   |   | 1     |
| Dankassari     | Koumchi                  | 307  | 1 |   |   |   | 1     |
| Dankassari     | Koumey                   | 762  | 1 | 1 | 1 | 1 | 3     |
| Dankassari     | Lillato                  | 722  |   |   |   |   | 1     |
| Dankassari     | Lougou                   | 366  | 1 | 1 |   | 1 | 2     |
| Dankassari     | Maraké Peulh             | 158  | 1 |   |   | 1 |       |
| Dankassari     | Marake Rogo (M.R. Peulh) | 827  | 1 |   |   | 1 |       |
| Dankassari     | Marake Toudou            | 633  | 1 |   | 1 | 1 | 1 3   |
| Dankassari     | Nakigaza (N. Detchi)     | 1764 | 1 |   |   | 1 | 1 3   |
| Dankassari     | Nakigaza Sarkin Rouafi   | 1367 | 1 |   |   |   | 1     |
| Dankassari     | Saourin Kaihi            | 1272 | 1 |   |   |   | 1     |
| Dankassari     | Tchito                   | 1334 | 1 |   |   | 1 |       |
| Dankassari     | Tchitto Djinbanawa       | 744  | 1 |   |   |   | 1     |
| Dankassari     | Tchitto Sarkin Rouahi    | 611  | 1 | 1 |   |   | 1 2   |
| Dankassari     | Toungana                 | 183  | 1 | 1 |   | 1 | 2     |
| Dankassari     | Tsabatankari             | 521  | 1 |   |   |   | 1     |
| Dioundiou      | Allakirey tribu          | 389  | 1 |   |   | 1 |       |
| Dioundiou      | Angoual Daoura           | 485  | 1 |   |   | 1 |       |
| Dioundiou      | Angoual Doka 1           | 911  | 1 |   |   | 1 |       |
| Dioundiou      | Angoual Doka 2           | 442  | 1 |   |   | 1 |       |
| Dioundiou      | Angoual Rey-rey          | 576  | 1 |   |   | 1 |       |
| Dioundiou      | Angoual Yaya             | 334  | 1 |   |   | 1 |       |
| Dioundiou      | Balifalo                 | 705  | 1 |   |   | 1 |       |
| Dioundiou      | Daffan                   | 559  | 1 |   |   | 1 |       |
| Dioundiou      | Dioundiou                | 6054 | 1 | 1 | 1 |   |       |

## Climate 2018

|              |                                |       |   |   |   |   |   |   |
|--------------|--------------------------------|-------|---|---|---|---|---|---|
| Dioundiou    | Dioundou urbain                | 6054  | 1 | 1 |   |   |   |   |
| Dioundiou    | Doli                           | 268   | 1 | 1 |   |   |   |   |
| Dioundiou    | Firore                         | 376   | 1 | 1 |   |   |   |   |
| Dioundiou    | Garey Goussou tribu            | 93    | 1 | 1 |   |   |   |   |
| Dioundiou    | Goroun Malam                   | 241   | 1 | 1 |   |   |   |   |
| Dioundiou    | Goroun Zangui                  | 591   | 1 | 1 |   |   |   |   |
| Dioundiou    | Gueza Bissala                  | 897   | 1 | 1 |   |   |   |   |
| Dioundiou    | Guigane                        | 441   | 1 | 1 |   |   |   |   |
| Dioundiou    | Hamamara                       | 1130  | 1 | 1 |   |   |   |   |
| Dioundiou    | Hamdallahi                     | 664   | 1 | 1 |   |   |   |   |
| Dioundiou    | Hamdallaye (Hamdallahi)        | 664   | 1 |   | 1 |   |   |   |
| Dioundiou    | Hattara Zaki Oubandawaki       | 109   | 1 | 1 |   |   |   |   |
| Dioundiou    | Kalgon Balla                   | 394   | 1 | 1 |   |   |   |   |
| Dioundiou    | Karki                          | 420   | 1 | 1 |   |   |   |   |
| Dioundiou    | Komakaina                      | 1170  | 1 | 1 |   |   |   |   |
| Dioundiou    | Koutoumouu                     | 3100  | 1 | 1 |   |   |   |   |
| Dioundiou    | Mague tribu                    | 326   | 1 | 1 |   |   |   |   |
| Dioundiou    | Makani                         | 539   | 1 | 1 |   |   |   |   |
| Dioundiou    | Mamaya                         | 386   | 1 | 1 |   |   |   |   |
| Dioundiou    | Mamaya tribu                   | 265   | 1 | 1 |   |   |   |   |
| Dioundiou    | Matcheri                       | 842   | 1 | 1 |   |   |   |   |
| Dioundiou    | Mourma Hadi                    | 281   | 1 | 1 |   |   |   |   |
| Dioundiou    | Rouan Koka                     | 436   | 1 | 1 |   |   |   |   |
| Dioundiou    | Takalafia                      | 1466  | 1 | 1 |   |   |   |   |
| Dioundiou    | Toulounboulou                  | 706   | 1 | 1 |   |   |   |   |
| Dioundiou    | Tounga Foga                    | 322   | 1 | 1 |   |   |   |   |
| Dioundiou    | Zouzou tribu                   | 163   | 1 | 1 |   |   |   |   |
| Dogon Kiria  | Balessa                        | 2921  | 1 | 1 |   |   |   |   |
| Dogon Kiria  | Dogonkiria Kare                | 1     |   | 1 |   |   |   |   |
| Dogon Kiria  | Tounoun Dounka Dogon Gao       | 437   | 1 |   |   |   | 1 |   |
| Dogondoutchi | Adoua                          | 510   | 1 |   |   |   | 1 |   |
| Dogondoutchi | Agadez (Agadez Oubandawaki Qt) | 1864  | 1 |   | 1 |   |   |   |
| Dogondoutchi | Dagmago (Damago Qt)            | 3166  | 1 |   | 1 |   |   |   |
| Dogondoutchi | Doutchi                        | 31941 | 1 |   | 1 | 1 | 1 | 3 |
| Dogondoutchi | Gambara (Gombara)              | 340   | 1 |   |   |   | 1 |   |
| Dogondoutchi | Kalanmota                      | 1     |   |   |   |   | 1 |   |
| Dogondoutchi | Kouka Bakoye                   | 1847  | 1 |   |   |   | 1 |   |
| Dogondoutchi | Liguido                        | 3690  | 1 |   |   |   | 1 |   |
| Dogondoutchi | Riji Tamna (Rigia Samna)       | 2352  | 1 |   |   |   | 1 |   |
| Dogondoutchi | Tellam                         | 1     |   |   |   |   | 1 |   |
| Dogonkiria   | Aboulala                       | 600   | 1 |   | 1 |   |   |   |
| Dogonkiria   | Aboulala Bargoumawa            | 481   | 1 |   |   | 1 | 1 | 3 |
| Dogonkiria   | Akoira Peulh                   | 21    | 1 |   | 1 |   | 1 | 2 |
| Dogonkiria   | Balessa                        | 2921  | 1 |   |   |   | 1 |   |
| Dogonkiria   | Bougou                         | 1039  | 1 |   |   |   | 1 |   |
| Dogonkiria   | Bougou Peulh                   | 162   | 1 |   |   |   | 1 |   |
| Dogonkiria   | Ct Agoumbi A. Toudoun Jaka     | 188   | 1 |   |   | 1 | 1 | 3 |
| Dogonkiria   | Camp.t Aggoum Zoougoura        | 184   | 1 |   |   |   | 1 |   |
| Dogonkiria   | Camp.t Fakon Madobiya          | 67    | 1 |   |   |   | 1 | 2 |
| Dogonkiria   | Camp.t Sabongari               | 164   | 1 |   |   |   | 1 |   |
| Dogonkiria   | Camp.t T Toudou Djaka          | 338   | 1 |   |   |   | 1 | 2 |
| Dogonkiria   | Camp.t Zougoura                | 71    | 1 |   |   |   | 1 |   |
| Dogonkiria   | Dangnaye (Dan Yaye)            | 438   | 1 |   |   |   | 1 | 2 |
| Dogonkiria   | Dodoria                        | 1173  | 1 |   |   |   | 1 | 2 |
| Dogonkiria   | Doga Aboulala                  | 253   | 1 | 1 | 1 | 1 | 1 | 5 |
| Dogonkiria   | Dogonkiria                     | 3064  | 1 |   |   |   | 1 | 2 |
| Dogonkiria   | Gachikaye                      | 582   | 1 |   |   |   | 1 | 2 |
| Dogonkiria   | Godaye (Godey)                 | 630   | 1 |   | 1 |   | 1 | 3 |
| Dogonkiria   | Godey                          | 630   | 1 | 1 |   | 1 |   | 2 |
| Dogonkiria   | Illéla Akoira                  | 1043  | 1 | 1 |   |   | 1 | 3 |
| Dogonkiria   | Intougai                       | 133   | 1 | 1 |   | 1 |   | 2 |
| Dogonkiria   | Intougaye                      | 133   | 1 |   |   |   | 1 | 2 |

## Climate 2018

|            |                              |      |   |   |   |   |   |   |
|------------|------------------------------|------|---|---|---|---|---|---|
| Dogonkoria | Issa Kitchi                  | 4117 | 1 |   |   | 1 |   |   |
| Dogonkoria | Kaiwa Fako                   | 1681 | 1 |   |   | 1 |   |   |
| Dogonkoria | Kaiwa Ganwo                  | 811  | 1 |   |   | 1 |   |   |
| Dogonkoria | Kalaba                       | 627  | 1 |   |   | 1 |   |   |
| Dogonkoria | Kassari                      | 886  | 1 |   | 1 | 1 | 1 | 4 |
| Dogonkoria | Kawara                       | 689  | 1 |   |   | 1 |   |   |
| Dogonkoria | Kitchi                       | 2144 | 1 |   |   | 1 | 1 | 2 |
| Dogonkoria | Koumari (K et hameaux)       | 1068 | 1 | 1 | 1 | 1 | 1 | 5 |
| Dogonkoria | Koutoumbou                   | 3386 | 1 | 1 |   |   |   |   |
| Dogonkoria | Maiguigé (Maiguize)          | 511  | 1 | 1 |   | 1 |   | 2 |
| Dogonkoria | Maimakainé                   | 2144 | 1 | 1 | 1 |   |   | 2 |
| Dogonkoria | Makourdi                     | 849  | 1 | 1 |   | 1 | 1 | 3 |
| Dogonkoria | Marjak                       | 1286 | 1 | 1 | 1 | 1 | 1 | 4 |
| Dogonkoria | Soucoucoutane Peulh          | 305  | 1 | 1 |   |   |   |   |
| Dogonkoria | Tambagani                    | 1756 | 1 |   |   | 1 | 1 | 2 |
| Dogonkoria | Toudoun Djaka (T. Jaka)      | 1023 | 1 |   | 1 | 1 | 1 | 3 |
| Dogonkoria | Toudoun Fatake               | 623  | 1 | 1 | 1 | 1 | 1 | 4 |
| Dogonkoria | Tounou Dounka (TD Dogon Gao) | 437  | 1 |   |   | 1 |   |   |
| Dogonkoria | Tsadoura Magorawa            | 680  | 1 | 1 |   |   |   |   |
| Dogonkoria | Yelmi Ahamet                 | 722  | 1 | 1 |   | 1 | 1 | 3 |
| Dogonkoria | Yelmi Roumboukawa            | 745  | 1 | 1 |   | 1 | 1 | 3 |
| Dogonkoria | Yilwa (Yelwa)                | 463  | 1 | 1 |   | 1 | 1 | 3 |
| Dosso CU   | Agali                        | 1833 | 1 |   | 1 |   |   |   |
| Dosso CU   | Boukata Kouara               | 315  | 1 |   |   |   | 1 |   |
| Dosso CU   | Daytagui Niandou             | 411  | 1 |   |   |   | 1 |   |
| Dosso CU   | Fode Beri                    | 636  | 1 |   |   |   | 1 |   |
| Dosso CU   | Kofadey                      | 649  | 1 |   | 1 |   |   |   |
| Dosso CU   | Koure Kobadey                | 882  | 1 |   |   | 1 | 1 | 2 |
| Dosso CU   | Koure Maliki                 | 601  | 1 |   |   | 1 | 1 | 2 |
| Dosso CU   | Koure Sakaou                 | 477  | 1 |   |   | 1 | 1 | 2 |
| Dosso CU   | Koygorou                     | 2041 | 1 |   |   |   | 1 |   |
| Dosso CU   | Niuga                        | 1376 | 1 |   |   |   | 1 |   |
| Dosso CU   | Takamagou                    | 603  | 1 |   |   |   | 1 |   |
| Dosso CU   | Tchambanga                   | 1965 | 1 |   | 1 |   |   |   |
| Dosso CU   | Zamodey                      | 656  | 1 |   | 1 |   |   |   |
| Doumega    | Angoual Garka                | 483  | 1 |   | 1 |   |   |   |
| Doumega    | Birmin Falla                 | 2420 | 1 |   | 1 |   |   |   |
| Doumega    | Boutana                      | 943  | 1 |   |   |   | 1 |   |
| Doumega    | Djadjatou                    |      | 1 |   | 1 |   |   |   |
| Doumega    | Doumega                      | 5080 | 1 |   | 1 | 1 | 1 | 3 |
| Doumega    | Garanga                      |      | 1 |   | 1 |   |   |   |
| Doumega    | Konawa                       | 563  | 1 |   | 1 | 1 |   | 2 |
| Doumega    | Wassa Da Hatchi              | 747  | 1 |   | 1 | 1 |   | 2 |
| Doumega    | Zoumbou                      | 3751 | 1 |   |   |   | 1 |   |
| Douméga    | Angoual Doutchi              | 409  | 1 |   |   | 1 | 1 | 2 |
| Douméga    | Angoual Garka                | 483  | 1 | 1 | 1 |   |   | 2 |
| Douméga    | Angoual Goube Falla          | 1584 | 1 | 1 |   | 1 |   | 2 |
| Douméga    | Angoual Hassada              | 498  | 1 | 1 |   | 1 |   | 2 |
| Douméga    | Angoual Toudou               | 1142 | 1 |   | 1 |   |   |   |
| Douméga    | Béchemi                      | 1082 | 1 |   |   |   | 1 |   |
| Douméga    | Bimi Falla                   | 2420 | 1 | 1 |   | 1 |   | 2 |
| Douméga    | Bimi Falla Peul              | 311  | 1 | 1 |   | 1 |   | 2 |
| Douméga    | Boutana                      | 943  | 1 | 1 |   | 1 | 1 | 3 |
| Douméga    | Doumega                      | 6430 | 1 |   | 1 | 1 |   | 2 |
| Douméga    | Douméga Peulh                | 5080 | 1 |   |   | 1 |   |   |
| Douméga    | Doungouzawa                  | 624  | 1 | 1 |   |   |   |   |
| Douméga    | Guidadam                     | 769  | 1 |   |   | 1 |   |   |
| Douméga    | Kelleli                      | 448  | 1 |   |   | 1 |   |   |
| Douméga    | Konawa                       | 563  | 1 | 1 | 1 |   |   | 2 |
| Douméga    | Mai Zabi                     | 665  | 1 | 1 | 1 |   |   |   |
| Douméga    | Mai Zari                     | 665  | 1 |   |   | 1 | 1 | 2 |
| Douméga    | Malabawa                     | 473  | 1 |   |   | 1 |   |   |
| Douméga    | Tombo boyo                   | 896  | 1 |   |   |   | 1 |   |

## Climate 2018

|         |                           |      |   |   |   |   |   |
|---------|---------------------------|------|---|---|---|---|---|
| Douméga | Tombo Tchiffa             | 617  | 1 | 1 |   |   |   |
| Douméga | Toudawa                   | 436  | 1 | 1 |   |   |   |
| Douméga | Tsalle                    | 824  | 1 | 1 |   |   |   |
| Douméga | Wassada Hatchi            | 747  | 1 | 1 |   |   |   |
| Douméga | Zariatou                  | 1599 | 1 | 1 | 1 |   | 2 |
| Douméga | Zoumbou                   | 3751 | 1 | 1 | 1 | 1 | 3 |
| Doutchi | Angoual Saoulo            | 1196 | 1 | 1 | 1 | 1 | 2 |
| Doutchi | Argoum                    | 504  | 1 | 1 |   |   |   |
| Doutchi | Batamberi Mamoudou        | 2102 | 1 | 1 |   | 1 | 2 |
| Doutchi | Dandagoum                 | 407  | 1 | 1 |   |   |   |
| Doutchi | Kalgo                     | 951  | 1 | 1 | 1 | 1 | 2 |
| Doutchi | Kelam                     | 840  | 1 |   |   | 1 |   |
| Doutchi | Kerketey                  | 382  | 1 | 1 |   | 1 | 2 |
| Doutchi | Koukabakoye               | 1847 | 1 | 1 |   |   |   |
| Doutchi | Kourya                    | 1284 | 1 | 1 |   |   |   |
| Doutchi | Liguido                   | 3690 | 1 | 1 |   |   |   |
| Doutchi | Rigia Samna               | 2352 | 1 | 1 |   | 1 | 2 |
| Doutchi | Tantchia (QT)             | 3006 | 1 | 1 | 1 |   |   |
| Doutchi | Togone                    | 3537 | 1 | 1 | 1 | 1 | 2 |
| Doutchi | Toulou Kaina              | 547  | 1 | 1 |   | 1 | 2 |
| Fabidji | Banbahi Alphaga Koira     | 41   | 1 | 1 |   |   |   |
| Fabidji | Bassi Djerma              | 1155 | 1 |   | 1 | 1 | 2 |
| Fabidji | Bassi Peulh               | 775  | 1 |   | 1 | 1 | 2 |
| Fabidji | Bierniel Alfari           | 305  | 1 |   |   | 1 | 2 |
| Fabidji | Bilingol Peulh            | 307  | 1 |   | 1 | 1 | 2 |
| Fabidji | Bilongol Zarma            | 405  | 1 |   | 1 | 1 | 2 |
| Fabidji | Birniel Ibrahim           | 1661 | 1 |   | 1 | 1 | 3 |
| Fabidji | Bombohi                   | 368  | 1 | 1 | 1 |   |   |
| Fabidji | Bombohi                   | 368  | 1 |   | 1 |   |   |
| Fabidji | Bombohi Ganda             | 218  | 1 |   | 1 |   |   |
| Fabidji | Deleigui Hassan           | 1    |   | 1 |   |   |   |
| Fabidji | Deytagui Amadou           | 1115 | 1 |   | 1 |   |   |
| Fabidji | Fabidji Djerma            | 3989 | 1 |   | 1 |   |   |
| Fabidji | Fabidji Haoussa           | 775  | 1 |   |   | 1 | 2 |
| Fabidji | Fabidji zarma             | 629  | 1 |   |   | 1 |   |
| Fabidji | Fandou Bali Bali          | 1431 | 1 |   | 1 | 1 | 2 |
| Fabidji | Fataloulou                | 219  | 1 |   |   | 1 | 2 |
| Fabidji | Firiniel Alfari           | 339  | 1 |   | 1 |   |   |
| Fabidji | Goberi Gnamakaley Peulh   | 626  | 1 |   | 1 | 1 | 2 |
| Fabidji | Goberi Gnamakaley Zarma   | 324  | 1 | 1 | 1 | 1 | 2 |
| Fabidji | Goberi Gnamangale Zarma   | 324  | 1 |   | 1 |   |   |
| Fabidji | Goberi Gobey              | 1040 | 1 | 1 | 1 | 1 | 2 |
| Fabidji | Goberi Goubey             | 1040 | 1 |   | 1 |   |   |
| Fabidji | Habiri                    | 629  | 1 |   | 1 | 1 | 2 |
| Fabidji | Irah                      | 1787 | 1 |   | 1 | 1 | 2 |
| Fabidji | Kargui Bangou             | 18   | 1 |   | 1 | 1 | 2 |
| Fabidji | Oumou Ize Koira           | 129  | 1 |   | 1 |   |   |
| Fabidji | Rogi Peulh                | 1255 | 1 |   | 1 |   |   |
| Fabidji | Rogi Zarma                | 177  | 1 |   | 1 |   |   |
| Fabidji | Sina Lesso (Sira Lelesso) | 235  | 1 |   | 1 |   |   |
| Fabidji | Sinakatoune               | 475  | 1 | 1 | 1 |   |   |
| Fabidji | Sirakatou                 | 475  | 1 |   | 1 |   |   |
| Fabidji | Souda Haini Baba Koira    | 247  | 1 |   | 1 |   |   |
| Fabidji | Tambo Hassane             | 495  | 1 |   | 1 |   |   |
| Fabidji | Tchancargui Zarma         | 1251 | 1 |   | 1 |   |   |
| Fabidji | Tchankardji               | 321  | 1 | 1 | 1 |   |   |
| Fabidji | Tchankargui               | 321  | 1 |   |   | 1 |   |
| Fabidji | Tihoré                    | 684  | 1 |   |   | 1 | 2 |
| Fabidji | Tombo Hassane             | 495  | 1 | 1 | 1 |   |   |
| Fabidji | Tombo Hassane             | 495  | 1 |   |   | 1 |   |
| Fabidji | Tondo                     | 1397 | 1 | 1 | 1 |   |   |
| Fabidji | Tondo                     | 1397 | 1 |   | 1 |   |   |
| Fabidji | Tormo Dioffo              | 219  | 1 |   | 1 |   |   |

## Climate 2018

|         |                          |      |   |   |   |   |   |   |   |
|---------|--------------------------|------|---|---|---|---|---|---|---|
| Fabidji | Torombi                  | 2423 | 1 | 1 | 1 |   |   |   |   |
| Fabidji | Torombi                  | 2423 |   | 1 |   | 1 | 1 | 1 | 3 |
| Fabidji | Toudou                   | 2022 |   | 1 |   |   |   | 1 |   |
| Fabidji | Trombi Dioffo            | 1155 |   | 1 |   |   | 1 |   |   |
| Fakara  | Gobriko Banizoumbou      | 1338 |   | 1 |   | 1 | 1 |   | 2 |
| Fakara  | Gombewa                  | 1244 |   | 1 |   | 1 | 1 | 1 | 3 |
| Fakara  | Gombriko Zanguina        | 811  |   | 1 |   | 1 |   | 1 | 2 |
| Fakara  | Guidal                   | 1804 |   | 1 |   |   | 1 |   |   |
| Fakara  | Kobodey                  | 1804 |   | 1 |   | 1 |   | 1 | 2 |
| Fakara  | Koddo                    | 1365 |   | 1 |   | 1 |   | 1 | 2 |
| Fakara  | Tanné Kaina              | 949  |   | 1 |   | 1 |   |   |   |
| Falmey  | Allouguel                | 374  |   | 1 |   | 1 |   |   |   |
| Falmey  | Banigoungou              | 3628 | 1 | 1 | 1 | 1 |   |   | 2 |
| Falmey  | Banigoungou              | 3698 |   | 1 | 1 |   |   |   |   |
| Falmey  | Belände Djerma           | 2791 |   | 1 | 1 |   |   |   |   |
| Falmey  | Belände Djerma Kaina     | 1031 |   | 1 | 1 |   |   |   |   |
| Falmey  | Belände Silenkey         | 554  |   | 1 | 1 |   |   |   |   |
| Falmey  | Belindé                  |      | 1 |   |   |   | 1 |   |   |
| Falmey  | Bomboji (Bombodji)       | 400  |   | 1 |   | 1 |   |   |   |
| Falmey  | Bouloumgaye              | 1193 |   | 1 |   | 1 |   |   |   |
| Falmey  | Boumba                   | 1774 |   | 1 | 1 | 1 |   |   |   |
| Falmey  | Boumba                   | 1774 |   | 1 |   | 1 |   |   |   |
| Falmey  | Bourdouga (Bourdounga)   | 586  |   | 1 |   | 1 | 1 |   | 2 |
| Falmey  | Boybangou Peulh          | 266  |   | 1 |   | 1 |   |   |   |
| Falmey  | Falmey                   | 6394 | 1 |   |   | 1 |   |   |   |
| Falmey  | Fono Birgui              | 428  |   | 1 |   | 1 |   |   |   |
| Falmey  | Gongueye                 | 1558 |   | 1 |   | 1 |   |   |   |
| Falmey  | Kaboboye                 | 922  |   | 1 |   | 1 |   |   |   |
| Falmey  | Kotaki                   | 3221 |   | 1 |   | 1 |   |   |   |
| Falmey  | Kouassi Peulh et Haoussa | 830  |   | 1 |   | 1 |   |   |   |
| Falmey  | Malam Koira              | 473  |   | 1 |   | 1 |   |   |   |
| Falmey  | Niamodey (Nianodey)      | 1418 |   | 1 |   | 1 | 1 |   | 2 |
| Falmey  | Saboula                  | 3476 | 1 | 1 | 1 |   |   |   |   |
| Falmey  | Saboula                  | 3476 |   | 1 |   | 1 |   |   |   |
| Falmey  | Tchantchoga Peulh        | 574  |   | 1 |   | 1 |   |   |   |
| Falmey  | Tchantioga Zarma         | 677  |   | 1 |   | 1 |   |   |   |
| Falmey  | Tonkassarey Peul         | 436  |   | 1 |   | 1 | 1 |   | 2 |
| Falmey  | Tonkassarey Zarma        | 509  |   | 1 |   | 1 | 1 |   | 2 |
| Falwel  | Aboudia (Abouja)         | 370  | 1 | 1 |   |   |   | 1 |   |
| Falwel  | Abouja                   | 370  |   | 1 |   |   | 1 | 1 | 2 |
| Falwel  | Ayo Koira                | 2174 |   | 1 | 1 | 1 | 1 | 1 | 3 |
| Falwel  | Ayo Kouara (Ayo Koira)   | 2174 | 1 |   |   |   | 1 |   |   |
| Falwel  | Ban Zoumbo (Banizoumbou) | 579  | 1 | 1 |   |   |   | 1 |   |
| Falwel  | Bani Zoumbou             | 72   |   | 1 |   |   | 1 | 1 | 2 |
| Falwel  | Banizoumbou Samari Dey   | 579  |   | 1 |   |   | 1 |   |   |
| Falwel  | Batamberi                | 1731 |   | 1 |   |   | 1 |   |   |
| Falwel  | Béla Béri Koara          | 416  |   | 1 |   |   | 1 |   |   |
| Falwel  | Darré koara              | 425  |   | 1 |   |   | 1 |   |   |
| Falwel  | Dey Tegui Moussa         | 586  | 1 | 1 |   |   | 1 |   |   |
| Falwel  | Dey Tégui Moussa         | 586  |   | 1 |   | 1 | 1 | 1 | 4 |
| Falwel  | Deytégui Samssou         | 562  |   | 1 |   | 1 |   | 1 | 3 |
| Falwel  | Deytegui Madé            | 921  |   | 1 |   | 1 |   | 1 | 2 |
| Falwel  | Deytégui Yamba           | 592  |   | 1 |   |   | 1 |   |   |
| Falwel  | Djaga dey                | 194  |   | 1 |   |   | 1 |   |   |
| Falwel  | Doundou Gorou            | 318  |   | 1 |   |   |   | 1 |   |
| Falwel  | Falwel                   | 5069 |   | 1 |   | 1 | 1 | 1 | 3 |
| Falwel  | Fantouyan                | 35   |   | 1 |   |   | 1 | 1 | 3 |
| Falwel  | Gardié                   | 1210 |   | 1 |   | 1 | 1 |   | 2 |
| Falwel  | Goroubéri Yérîma         | 1387 |   | 1 |   |   | 1 | 1 | 2 |
| Falwel  | Goubey Dey               | 896  |   | 1 |   | 1 |   | 1 | 3 |
| Falwel  | Goubey Dey Sido          | 455  |   | 1 |   |   | 1 |   |   |
| Falwel  | Goulmé                   | 451  |   | 1 |   |   | 1 |   |   |
| Falwel  | Gounno koara             | 684  |   | 1 |   |   | 1 |   |   |

## Climate 2018

|            |                              |      |   |   |   |   |   |   |
|------------|------------------------------|------|---|---|---|---|---|---|
| Falwel     | Hamdallahi                   | 779  | 1 | 1 | 1 |   |   |   |
| Falwel     | Hamdallaye                   | 779  |   | 1 | 1 | 1 | 2 |   |
| Falwel     | Héra Koara                   | 677  |   | 1 |   | 1 |   |   |
| Falwel     | Hintchinkoye Koira           | 579  |   | 1 | 1 |   |   |   |
| Falwel     | Kaboé Koira (Kaboy Koara)    | 1121 |   | 1 | 1 |   | 2 |   |
| Falwel     | Ko Koukou                    | 673  |   | 1 | 1 |   |   |   |
| Falwel     | Koba Koara                   | 879  |   | 1 | 1 |   |   |   |
| Falwel     | Kobi Madé                    | 402  |   | 1 | 1 |   |   |   |
| Falwel     | Kodey                        | 985  |   | 1 | 1 |   |   |   |
| Falwel     | Kofitti                      | 531  |   | 1 |   | 1 |   |   |
| Falwel     | Kogou                        | 1401 |   | 1 |   | 1 |   |   |
| Falwel     | Kossey Gorou                 | 384  |   | 1 |   | 1 | 1 | 2 |
| Falwel     | Koussa Koara                 | 448  |   | 1 |   | 1 |   |   |
| Falwel     | Koykona Koira                | 922  |   | 1 | 1 | 1 | 2 |   |
| Falwel     | Ladan Dey                    | 418  |   | 1 | 1 |   | 1 |   |
| Falwel     | Ladan Dey                    | 418  | 1 |   |   | 1 |   |   |
| Falwel     | Laou goumbi                  | 520  |   | 1 |   | 1 | 1 | 2 |
| Falwel     | Madina                       | 404  |   | 1 |   | 1 | 1 | 2 |
| Falwel     | Maitchigo                    | 325  |   | 1 |   |   | 1 |   |
| Falwel     | Mallam Koira                 | 1539 |   | 1 |   |   | 1 |   |
| Falwel     | Maourey dey                  | 68   |   | 1 | 1 | 1 | 1 | 3 |
| Falwel     | Maourey Dey Gombo Gandé      | 187  |   | 1 |   | 1 |   |   |
| Falwel     | Marafa Kouara                | 692  |   | 1 | 1 | 1 |   | 2 |
| Falwel     | Mbala Daouda                 | 440  |   | 1 |   | 1 | 1 | 2 |
| Falwel     | Mbala Djibrilla              | 566  |   | 1 |   | 1 | 1 | 2 |
| Falwel     | Moussadey Kaina              | 1443 |   | 1 |   |   | 1 |   |
| Falwel     | Sambo Koara                  | 310  |   | 1 |   | 1 |   |   |
| Falwel     | Sarkin Noma Koira            | 600  |   | 1 |   |   | 1 |   |
| Falwel     | Sarkin Yara Koara            | 1294 |   | 1 |   | 1 | 1 | 2 |
| Falwel     | Soudjey Dey Bani Kane        | 182  |   | 1 |   |   | 1 |   |
| Falwel     | Tegoize Koira                | 307  |   | 1 | 1 |   |   |   |
| Falwel     | Tegoize Koira Zeno           | 555  |   | 1 | 1 |   |   |   |
| Falwel     | Tolo Tombo (Tollo Tombo)     | 141  | 1 |   |   | 1 |   |   |
| Falwel     | Toullou Maimassa             | 2451 |   | 1 | 1 | 1 | 1 | 2 |
| Falwel     | Toulou Malmassa              | 2451 | 1 |   |   |   | 1 |   |
| Falwel     | Wadata                       | 729  |   | 1 |   |   | 1 |   |
| Falwel     | Zabia Koara                  | 1287 |   | 1 |   |   | 1 |   |
| Falwel     | Zozo Tombo Harouna           | 1051 |   | 1 | 1 | 1 | 1 | 4 |
| Falwel     | Zozo Tombo Koda              | 581  |   | 1 |   | 1 | 1 | 2 |
| Farey      | Babba Koira                  | 154  |   | 1 | 1 |   |   |   |
| Farey      | Barazé Gourou                | 1114 |   | 1 | 1 |   |   |   |
| Farey      | Bodinga                      | 519  |   | 1 | 1 |   |   |   |
| Farey      | Boukagourou                  | 848  |   | 1 | 1 |   |   |   |
| Farey      | Boundoki                     | 720  |   | 1 | 1 |   |   |   |
| Farey      | Dédé Koara                   | 92   |   | 1 | 1 |   | 1 | 2 |
| Farey      | Farey Kaina                  | 677  |   | 1 |   |   | 1 |   |
| Farey      | Farrey                       | 1209 |   | 1 | 1 |   | 1 | 2 |
| Farey      | Garbey Tombo                 | 659  |   | 1 | 1 |   |   |   |
| Farey      | Gonga Karimou                | 271  |   | 1 | 1 |   | 1 | 2 |
| Farey      | Guimba Tombo                 | 560  |   | 1 | 1 |   |   |   |
| Farey      | Hainikoye Koira              | 424  |   | 1 | 1 |   |   |   |
| Farey      | Kaffi                        | 1809 |   | 1 | 1 |   |   |   |
| Farey      | Koassey                      | 1266 |   | 1 | 1 |   |   |   |
| Farey      | Libo Tegui                   | 850  |   | 1 | 1 |   | 1 | 2 |
| Farey      | Libo Zeno                    | 421  |   | 1 | 1 |   | 1 | 2 |
| Farey      | Maureydey                    | 1061 |   | 1 | 1 |   |   |   |
| Farey      | Mayaki Koara                 | 498  |   | 1 | 1 |   |   |   |
| Farey      | Nassarawa (N. Tegui)         | 448  |   | 1 | 1 |   |   |   |
| Farey      | Talibi Roufaye (T. Lourdaye) | 325  |   | 1 | 1 |   |   |   |
| Garankedey | Bani Kane Bomberi            | 286  |   | 1 | 1 |   |   |   |
| Garankedey | Banizoubou Hama              | 490  |   | 1 |   | 1 | 1 | 2 |
| Garankedey | Bankadey                     | 513  |   | 1 | 1 | 1 | 1 | 5 |
| Garankedey | Barma                        | 811  |   | 1 |   | 1 | 1 | 3 |

## Climate 2018

|            |                             |      |   |   |   |   |   |   |
|------------|-----------------------------|------|---|---|---|---|---|---|
| Garankedey | Boulkoutou                  | 974  | 1 | 1 | 1 |   |   | 2 |
| Garankedey | Darey Karimou               | 788  | 1 |   | 1 |   |   |   |
| Garankedey | Deytagui Attili             | 1848 | 1 | 1 |   | 1 | 1 | 3 |
| Garankedey | Deytagui Hassane            | 265  | 1 |   |   |   | 1 |   |
| Garankedey | Deytagui Noma               | 745  | 1 |   | 1 | 1 | 1 | 3 |
| Garankedey | Deytagui Yarou              | 663  | 1 |   | 1 |   | 1 | 1 |
| Garankedey | Deytegui Attili             | 1848 | 1 |   |   | 1 |   |   |
| Garankedey | Forcey                      | 472  | 1 |   |   | 1 | 1 | 1 |
| Garankedey | Gamonzon Zamey Do           | 845  | 1 | 1 |   |   |   | 3 |
| Garankedey | Gandaberi Koira             | 1091 | 1 | 1 |   | 1 | 1 | 3 |
| Garankedey | Garankédey                  | 3147 | 1 | 1 |   |   | 1 | 2 |
| Garankedey | Gongadeybéri                | 1033 | 1 |   | 1 | 1 | 1 | 1 |
| Garankedey | Gongatarey                  | 1622 | 1 | 1 |   |   |   |   |
| Garankedey | Goudel                      | 968  | 1 |   |   |   | 1 | 1 |
| Garankedey | Guéssé béri                 | 2032 | 1 | 1 |   | 1 |   | 1 |
| Garankedey | Guéssé kaina                | 482  | 1 | 1 |   | 1 |   | 1 |
| Garankedey | Kayan                       | 2581 | 1 |   | 1 |   | 1 | 1 |
| Garankedey | Kotombo                     | 1465 | 1 | 1 |   | 1 |   |   |
| Garankedey | Kotombo                     | 1465 | 1 | 1 |   |   |   | 1 |
| Garankedey | Sourgou hilli               | 1590 | 1 |   |   |   |   | 1 |
| Garankedey | Tombo Béri                  | 1442 | 1 |   | 1 |   | 1 | 1 |
| Gaya       | Bai Tounga                  | 1    |   |   |   |   | 1 |   |
| Gaya       | Baye Tounga                 | 103  | 1 |   |   | 1 |   |   |
| Gaya       | Dendi Kourey                | 1    |   |   |   |   |   | 1 |
| Gaya       | Foo                         | 792  | 1 |   |   | 1 | 1 | 1 |
| Gaya       | Gatta Tounga (Gata Tounga)  | 111  | 1 |   |   |   |   | 1 |
| Gaya       | Gaya Plateau II             | 1    |   |   |   |   |   | 1 |
| Gaya       | Kessa                       | 800  | 1 | 1 |   | 1 |   |   |
| Gaya       | Kiassa (Kiessa)             | 800  | 1 |   |   |   |   | 1 |
| Gaya       | Kobassi                     | 76   | 1 |   |   | 1 |   | 1 |
| Gaya       | Koira Tegui I               | 92   | 1 |   |   |   |   | 1 |
| Gaya       | Koira Tegui II              | 1    |   |   |   |   |   | 1 |
| Gaya       | Koira Tegui III             | 1    |   |   |   |   |   | 1 |
| Gaya       | Koira Tegui III suite       | 1    |   |   |   |   |   | 1 |
| Gaya       | Kombo                       | 89   | 1 |   |   | 1 | 1 | 1 |
| Gaya       | Kotcha                      | 652  | 1 | 1 |   | 1 | 1 |   |
| Gaya       | Kotcha                      | 652  | 1 |   |   | 1 |   |   |
| Gaya       | Sakabatoum                  | 1    |   |   |   |   |   | 1 |
| Gaya       | Sakondji Birni              | 467  | 1 |   |   | 1 |   |   |
| Gaya       | Sandi Tuonga                | 134  | 1 |   |   |   |   | 1 |
| Gaya       | Sokondji Birni (Sakondji)   | 467  | 1 |   |   |   | 1 |   |
| Gaya       | Tara                        | 4989 | 1 | 1 |   | 1 | 1 | 1 |
| Gaya       | Tara                        | 4989 | 1 |   |   | 1 |   |   |
| Gaya       | Tombo Beri                  | 725  | 1 |   |   | 1 |   |   |
| Gaya       | Tondika                     | 669  | 1 | 1 |   | 1 |   |   |
| Gaya       | Tondika                     | 669  | 1 |   |   | 1 |   |   |
| Gaya       | Tounga Maihoda (T. Maikada) | 134  | 1 |   |   | 1 |   |   |
| Gaya       | Tounga Sandi                | 1    |   |   |   | 1 |   |   |
| Gaya       | Zongo                       | 1    |   |   |   |   |   | 1 |
| Gollé      | Bangou Kirey                | 662  | 1 |   |   |   | 1 | 1 |
| Gollé      | Banizoumbou Rambé           | 978  | 1 |   |   | 1 |   |   |
| Gollé      | Damari                      | 492  | 1 |   |   |   |   | 1 |
| Gollé      | Gollé                       | 1084 | 1 |   |   |   | 1 |   |
| Gollé      | Gomboro                     | 674  | 1 |   |   |   | 1 | 1 |
| Gollé      | Gorou Yéno                  | 1477 | 1 |   |   |   | 1 |   |
| Gollé      | Hambéra                     | 1    |   |   |   |   |   | 1 |
| Gollé      | Nabani Kouara               | 166  | 1 |   |   |   | 1 |   |
| Gollé      | Souley garou                | 314  | 1 |   |   |   |   | 1 |
| Gollé      | Souley Kouara (S. Garou K.) | 328  | 1 |   |   |   |   | 1 |
| Gollé      | Tadékoara                   | 314  | 1 |   |   |   |   | 1 |
| Gollé      | Tiarabéri (Kiara Béri)      | 1126 | 1 |   |   | 1 |   |   |
| Gollé      | Tiamo (Kiara-No) (Tcharno)  | 615  | 1 |   |   | 1 |   |   |

## Climate 2018

|                 |                              |      |   |   |   |   |   |   |   |   |
|-----------------|------------------------------|------|---|---|---|---|---|---|---|---|
| Gollé           | Tombokaïna                   | 708  |   | 1 |   |   | 1 | 1 |   | 2 |
| Gollé           | Yambare                      | 1988 | 1 |   | 1 |   | 1 |   |   |   |
| Gollé           | Yambare                      | 1988 |   | 1 |   |   |   | 1 |   |   |
| Gorou Bankassam | Bakodey                      | 997  |   | 1 | 1 |   |   |   |   |   |
| Gorou Bankassam | Barguiko Beri                | 1380 |   | 1 | 1 |   |   |   |   |   |
| Gorou Bankassam | Bondiolo                     | 485  |   | 1 |   |   | 1 | 1 |   | 2 |
| Gorou Bankassam | Djakoley                     | 466  |   | 1 |   |   | 1 |   | 1 | 2 |
| Gorou Bankassam | Gafiadey                     | 1618 |   | 1 | 1 |   | 1 | 1 | 1 | 4 |
| Gorou Bankassam | Gatabangou                   | 374  |   | 1 |   |   | 1 | 1 | 1 | 3 |
| Gorou Bankassam | Gorou Bankassam              | 2442 |   | 1 | 1 |   |   |   |   |   |
| Gorou Bankassam | Kodourgnedey                 | 735  |   | 1 |   |   |   |   | 1 |   |
| Gorou Bankassam | Kombey                       | 334  |   | 1 |   |   | 1 |   | 1 | 2 |
| Gorou Bankassam | Kouloumbou                   | 358  |   | 1 |   |   | 1 | 1 | 1 | 3 |
| Gorou Bankassam | Koumbokoydey                 | 235  |   | 1 |   |   |   | 1 |   |   |
| Gorou Bankassam | Kountchétaey Hama            | 927  |   | 1 |   |   |   | 1 | 1 | 2 |
| Gorou Bankassam | Kountchétaey Moussa          | 1398 |   | 1 |   |   |   | 1 |   |   |
| Gorou Bankassam | Narey Alpha Bano             | 853  |   | 1 |   |   |   | 1 |   |   |
| Gorou Bankassam | Narey Zangui Neze Dey        | 354  |   | 1 |   |   |   |   | 1 |   |
| Gorou Bankassam | Nikki Kouara Tegui           | 197  |   | 1 | 1 |   |   |   |   |   |
| Gorou Bankassam | Nima                         | 141  |   | 1 |   |   |   |   | 1 |   |
| Gorou Bankassam | Sawara Kaoua                 | 302  |   | 1 |   |   |   |   | 1 |   |
| Gorou Bankassam | Sirfidey                     | 596  |   | 1 |   |   |   |   | 1 |   |
| Gorou Bankassam | Sorko Banikan                | 745  |   | 1 |   |   |   |   | 1 |   |
| Gorou Bankassam | Sorko Beri                   | 882  |   | 1 |   |   |   |   | 1 |   |
| Gorou Bankassam | Tarey Tombo                  | 988  |   | 1 | 1 |   |   |   |   |   |
| Gorou Bankassam | Tinne Dendi                  | 644  |   | 1 | 1 |   |   |   |   |   |
| Gorou Bankassam | Torso                        | 711  |   | 1 | 1 |   | 1 | 1 | 1 | 4 |
| Gorou Bankassam | Wonkoy Dey                   | 262  |   | 1 |   |   | 1 | 1 |   | 2 |
| Gorou Bankassam | Yamoussa koira               | 653  |   | 1 |   |   | 1 | 1 | 1 | 4 |
| Gorou Bankassam | Yarou Koira                  | 1027 |   | 1 | 1 |   |   | 1 |   | 2 |
| Guechemé        | Angoual Bozari = Illéla      | 1327 |   | 1 | 1 |   | 1 |   | 1 | 3 |
| Guechemé        | Heredamtché                  | 866  |   | 1 |   |   |   |   | 1 |   |
| Guechemé        | Katarma                      | 126  |   | 1 |   |   |   |   | 1 |   |
| Guechemé        | Angoual Bozari               | 1327 | 1 |   |   |   |   | 1 |   |   |
| Guechemé        | Angoual Chekaraou            | 1440 | 1 |   | 1 |   | 1 |   |   |   |
| Guechemé        | Angoual Chekaraou            | 1440 |   | 1 |   | 1 | 1 |   |   | 2 |
| Guechemé        | Angoual Kade (A. Kedey)      | 599  |   | 1 |   | 1 | 1 |   |   | 2 |
| Guechemé        | Angoual Maba                 | 1176 | 1 |   | 1 |   | 1 |   |   |   |
| Guechemé        | Angoual Maba                 | 1176 |   | 1 |   |   | 1 |   |   |   |
| Guechemé        | Angoual Marafa               | 961  |   | 1 |   | 1 |   |   |   |   |
| Guechemé        | Angouaz Magori               | 1    |   |   |   |   |   |   | 1 |   |
| Guechemé        | Bagawa                       | 1    |   |   |   |   |   | 1 |   |   |
| Guechemé        | Ballam                       | 192  |   | 1 |   | 1 |   |   |   |   |
| Guechemé        | Ballam Peulh                 | 237  |   | 1 |   |   | 1 |   |   |   |
| Guechemé        | Ballama (Maiyaki / Chiphau)  | 796  |   | 1 |   |   | 1 | 1 |   | 2 |
| Guechemé        | Bawada                       | 891  | 1 |   |   |   |   | 1 |   |   |
| Guechemé        | Bawada Indayya               | 1356 |   | 1 |   |   | 1 |   | 1 | 2 |
| Guechemé        | Bayawa Guéchémé              | 82   |   | 1 | 1 |   |   |   |   |   |
| Guechemé        | Bey-Bey                      | 2988 | 1 |   | 1 |   |   | 1 |   |   |
| Guechemé        | Beye Beye                    | 2988 |   | 1 |   | 1 |   |   | 1 | 2 |
| Guechemé        | Boyé Boyé                    | 1037 |   | 1 | 1 |   |   |   | 1 | 2 |
| Guechemé        | Chelweye Dembi (Halweye)     | 1565 |   | 1 |   | 1 |   |   |   |   |
| Guechemé        | Choukoura                    | 417  |   | 1 |   | 1 |   |   | 1 | 2 |
| Guechemé        | Damana                       | 1216 |   | 1 | 1 |   | 1 |   |   | 2 |
| Guechemé        | Damana Peulh                 | 465  |   | 1 |   |   | 1 |   |   |   |
| Guechemé        | Djabadadiwa Aoua             |      |   | 1 |   |   |   | 1 |   |   |
| Guechemé        | Djabdaguiwa (Djabada Gouiwa) | 1359 |   | 1 |   |   |   | 1 |   |   |
| Guechemé        | Fadama                       | 3603 | 1 |   | 1 |   | 1 | 1 | 1 | 3 |
| Guechemé        | Fadama                       | 3603 |   | 1 | 1 | 1 | 1 | 1 | 1 | 5 |
| Guechemé        | Falmay                       | 1    |   |   |   |   |   | 1 |   |   |
| Guechemé        | Gabasse                      | 1    |   |   |   |   |   | 1 |   |   |
| Guechemé        | Garin Anroua                 |      |   | 1 |   |   |   |   |   |   |

## Climate 2018

|          |                             |      |   |   |   |   |   |   |   |
|----------|-----------------------------|------|---|---|---|---|---|---|---|
| Guechemé | Garin Ganga                 | 261  |   | 1 |   | 1 |   |   |   |
| Guechemé | Garin Gao                   |      |   | 1 |   |   | 1 |   |   |
| Guechemé | Garin Léla (G. Lele)        | 149  |   | 1 | 1 | 1 | 1 | 1 | 3 |
| Guechemé | Garin Lele                  | 149  | 1 |   |   | 1 | 1 |   | 2 |
| Guechemé | Goubawa                     | 946  | 1 |   | 1 |   | 1 | 1 | 2 |
| Guechemé | Goubawa                     | 946  |   | 1 |   | 1 | 1 | 1 | 3 |
| Guechemé | Guechemé                    | 8412 | 1 |   | 1 |   | 1 | 1 | 2 |
| Guechemé | Guechemé                    | 8412 |   | 1 |   | 1 |   |   |   |
| Guechemé | Guézeraou                   | 724  |   | 1 |   |   |   | 1 |   |
| Guechemé | Guidal                      | 503  |   | 1 |   | 1 | 1 |   | 2 |
| Guechemé | Guiwayé                     | 1661 | 1 |   | 1 |   |   | 1 |   |
| Guechemé | Guiwayé                     | 1661 |   | 1 |   |   |   | 1 | 2 |
| Guechemé | Guiwayé Toudoua             | 205  |   | 1 |   |   |   | 1 |   |
| Guechemé | Guizarawa                   | 310  | 1 |   | 1 |   | 1 | 1 | 2 |
| Guechemé | Guizarawa                   | 310  |   | 1 |   | 1 | 1 |   | 2 |
| Guechemé | Here Damchi                 | 835  |   | 1 |   |   | 1 |   |   |
| Guechemé | Here Damtche Peulh          | 252  |   | 1 |   | 1 | 1 |   | 2 |
| Guechemé | Here Dantche                | 740  | 1 |   |   |   | 1 | 1 | 2 |
| Guechemé | Houri                       | 533  |   | 1 |   | 1 |   |   |   |
| Guechemé | Jamma Zoubi                 | 567  |   | 1 |   | 1 |   |   |   |
| Guechemé | Kahirou                     | 323  |   | 1 |   | 1 | 1 |   | 2 |
| Guechemé | Kalgo                       | 861  |   | 1 |   | 1 |   |   |   |
| Guechemé | Kanda                       | 1730 |   | 1 |   | 1 |   |   |   |
| Guechemé | Kao Kao                     | 819  |   | 1 |   |   | 1 |   |   |
| Guechemé | Katami                      | 1233 |   | 1 |   | 1 |   | 1 | 2 |
| Guechemé | Katarma (K. Garin Gaoh)     | 483  | 1 |   | 1 |   | 1 |   |   |
| Guechemé | Katarma (K. Garin Gaoh)     | 483  |   | 1 |   |   | 1 |   |   |
| Guechemé | Kotadeye                    | 1007 |   | 1 |   | 1 | 1 |   | 2 |
| Guechemé | Kouda Wadata                | 429  |   | 1 |   | 1 |   | 1 | 2 |
| Guechemé | Kouda Zaouna                | 534  |   | 1 |   | 1 |   | 1 | 2 |
| Guechemé | Kouka Oukou                 | 685  | 1 |   |   |   | 1 |   |   |
| Guechemé | Kourfayawa                  | 367  |   | 1 |   | 1 | 1 |   | 2 |
| Guechemé | Koutoulougoué               | 1064 |   | 1 |   | 1 | 1 |   | 2 |
| Guechemé | Landara                     | 2398 |   | 1 |   | 1 |   | 1 | 2 |
| Guechemé | Landara Sanké               | 876  |   | 1 |   | 1 |   | 1 | 2 |
| Guechemé | Lido                        | 3674 | 1 |   | 1 |   |   | 1 |   |
| Guechemé | Lido                        | 3674 |   | 1 |   | 1 | 1 | 1 | 3 |
| Guechemé | Lido Peulh                  | 134  |   | 1 |   | 1 | 1 |   | 2 |
| Guechemé | Lokoko                      | 3944 | 1 |   | 1 |   | 1 | 1 | 2 |
| Guechemé | Lokoko                      | 3944 |   | 1 |   | 1 | 1 | 1 | 3 |
| Guechemé | Lougou                      |      | 1 |   |   |   |   | 1 |   |
| Guechemé | Madoki                      | 493  |   | 1 |   | 1 | 1 |   | 2 |
| Guechemé | Magé (Maje Toudawa)         | 1437 |   | 1 |   |   |   | 1 |   |
| Guechemé | Magori                      | 712  |   | 1 |   |   |   | 1 |   |
| Guechemé | Maizari Mainassara          | 264  |   | 1 |   | 1 |   |   |   |
| Guechemé | Makoissa Fallawa            |      |   | 1 |   |   | 1 | 1 | 2 |
| Guechemé | Makoissa Toudawa (Toudouwa) | 647  |   | 1 |   |   | 1 | 1 | 2 |
| Guechemé | Makorwa                     | 1829 |   | 1 |   |   | 1 |   |   |
| Guechemé | Mouzou Mouzou               | 890  |   | 1 |   | 1 |   |   |   |
| Guechemé | Rounkoundoum                | 245  |   | 1 |   | 1 |   | 1 | 2 |
| Guechemé | Sabarou                     | 1034 | 1 |   | 1 |   |   | 1 |   |
| Guechemé | Sabarou                     | 1034 |   | 1 |   | 1 |   |   |   |
| Guechemé | Sabon Gari Foga             | 3567 | 1 |   |   |   | 1 | 1 | 2 |
| Guechemé | Sabongari                   | 3567 |   | 1 |   |   | 1 | 1 | 3 |
| Guechemé | Sakoira                     | 873  | 1 |   |   |   |   | 1 |   |
| Guechemé | Samia [Tsamia?]             | 1154 | 1 |   |   |   |   | 1 |   |
| Guechemé | Takassaba (T. Adoua)        | 312  | 1 |   |   |   | 1 | 1 | 2 |
| Guechemé | Takatsaba (T. Kouka)        | 397  |   | 1 |   | 1 | 1 | 1 | 4 |
| Guechemé | Tapkin-Inoua                | 586  |   | 1 |   | 1 | 1 |   | 2 |
| Guechemé | Tombo Dogo                  | 2050 |   | 1 |   | 1 |   | 1 | 2 |
| Guechemé | Tombo Dogo Peulh            | 111  |   | 1 |   | 1 |   |   |   |
| Guechemé | Tombo Tounga                | 856  |   | 1 |   |   |   | 1 |   |

## Climate 2018

|              |                          |      |   |   |   |   |   |   |   |
|--------------|--------------------------|------|---|---|---|---|---|---|---|
| Guechemé     | Toudoun Faila            | 1440 |   | 1 |   |   |   | 1 |   |
| Guechemé     | Touhééré                 | 408  |   | 1 |   | 1 |   |   |   |
| Guechemé     | Tounga Chawa             |      | 1 |   |   |   | 1 |   |   |
| Guechemé     | Tounga Dobi              | 312  |   | 1 |   |   |   | 1 |   |
| Guechemé     | Tounga Gamji             | 946  |   | 1 |   |   |   | 1 |   |
| Guechemé     | Tounga Kade              | 671  | 1 |   |   |   |   | 1 |   |
| Guechemé     | Tounga Maikomsa          | 353  | 1 |   |   |   | 1 |   |   |
| Guechemé     | Tounga Soli              | 397  | 1 |   | 1 |   | 1 | 1 | 2 |
| Guechemé     | Tounga Soli              | 397  |   | 1 |   |   |   | 1 | 2 |
| Guechemé     | Tsamia                   | 1154 |   | 1 |   |   |   | 1 | 2 |
| Guechemé     | Wassangou                | 1188 |   | 1 |   |   | 1 |   |   |
| Guechemé     | Yangana                  | 312  | 1 |   | 1 |   |   | 1 |   |
| Guechemé     | Yangana                  | 312  |   | 1 |   |   | 1 | 1 | 3 |
| Guechemé     | Yangana Peul             | 441  |   | 1 |   |   | 1 | 1 | 3 |
| Guechemé     | Zagari                   | 213  |   | 1 |   |   |   | 1 |   |
| Guilladjé    | Afodamata                | 1805 |   | 1 |   | 1 |   |   |   |
| Guilladjé    | Alfa Koira               | 653  |   | 1 |   |   | 1 |   |   |
| Guilladjé    | Bariké Koira             | 717  |   | 1 |   | 1 |   | 1 | 3 |
| Guilladjé    | Bounou Koira             | 244  | 1 |   |   |   | 1 |   |   |
| Guilladjé    | Bouringa Kaina           | 342  |   | 1 |   |   | 1 |   |   |
| Guilladjé    | Djabali Djerma           | 407  | 1 |   |   |   | 1 |   |   |
| Guilladjé    | Djabali Peulh            | 488  | 1 |   | 1 |   | 1 |   |   |
| Guilladjé    | Djabali Peulh            | 488  |   | 1 |   |   | 1 |   |   |
| Guilladjé    | Djabali Zarma            | 407  |   | 1 |   |   | 1 |   |   |
| Guilladjé    | Garbou                   | 417  |   | 1 |   | 1 |   |   |   |
| Guilladjé    | Guilladjé                | 2238 |   | 1 | 1 |   | 1 |   |   |
| Guilladjé    | Guilladjé                | 2238 | 1 |   |   |   | 1 |   |   |
| Guilladjé    | Hamdalaye Hama           | 747  | 1 |   | 1 |   | 1 |   |   |
| Guilladjé    | Hamdallaye Hama          | 747  |   | 1 |   | 1 |   |   |   |
| Guilladjé    | Hamdallaye Hassane       |      | 1 |   |   |   | 1 |   |   |
| Guilladjé    | Ladenedji Djerma         | 1402 | 1 |   | 1 |   | 1 |   |   |
| Guilladjé    | Ladenedjo Djerma         | 1402 |   | 1 |   |   | 1 |   |   |
| Guilladjé    | Ladenedji Yaro           |      | 1 |   |   |   | 1 |   |   |
| Guilladjé    | Ladenedjo Peulh          | 472  |   | 1 |   |   | 1 |   |   |
| Guilladjé    | Sansaré                  | 381  |   | 1 |   |   | 1 |   |   |
| Guilladjé    | Sour Sour                | 140  | 1 |   |   |   | 1 |   |   |
| Guilladjé    | Tchangue                 | 439  |   | 1 |   | 1 |   |   |   |
| Guilladjé    | Toudourou                | 385  |   | 1 |   |   | 1 |   |   |
| Guilladjé    | Tourou Tourou Koira      | 1432 | 1 |   | 1 |   | 1 |   |   |
| Guilladjé    | Tourou Tourou Koira      | 1432 |   | 1 |   |   | 1 |   |   |
| Guilladjé    | Windi Bago               | 1708 |   | 1 | 1 |   | 1 | 1 | 2 |
| Guilladjé    | Windi Bago Peulh         | 1708 | 1 |   |   |   | 1 |   |   |
| Harikanassou | Alfa Bire Moumouni       | 388  |   | 1 |   | 1 |   |   |   |
| Harikanassou | Bella Koira              | 679  |   | 1 |   | 1 | 1 | 1 | 4 |
| Harikanassou | Bogol Hima               | 1571 |   | 1 |   | 1 | 1 | 1 | 4 |
| Harikanassou | Bogol Mamar              | 682  |   | 1 |   | 1 | 1 | 1 | 3 |
| Harikanassou | Daniaré Koira Tégui      | 155  |   | 1 |   | 1 |   | 1 | 2 |
| Harikanassou | Fandou Djadi             | 611  |   | 1 |   | 1 |   |   |   |
| Harikanassou | Fandou Djibo             | 211  |   | 1 |   | 1 |   |   |   |
| Harikanassou | Gamsa Zougou             | 424  |   | 1 |   | 1 |   | 1 | 3 |
| Harikanassou | Gorou Kaina              | 770  |   | 1 |   | 1 |   |   |   |
| Harikanassou | Gounoubi                 | 334  |   | 1 |   | 1 | 1 | 1 | 4 |
| Harikanassou | Harikanassou (H. Djerma) | 1416 |   | 1 |   | 1 | 1 | 1 | 4 |
| Harikanassou | Komaguindi Peulh         | 270  |   | 1 |   | 1 |   |   |   |
| Harikanassou | Komaguindi Zou           | 368  |   | 1 |   | 1 |   |   |   |
| Harikanassou | Koubobi Koura            | 1230 |   | 1 |   | 1 |   |   |   |
| Harikanassou | Koubobo Sori             | 825  |   | 1 |   | 1 |   |   |   |
| Harikanassou | Kouringuel Kaou          | 162  |   | 1 |   | 1 |   | 1 | 2 |
| Harikanassou | Kouringuel Mayaki        | 1778 |   | 1 |   | 1 |   | 1 | 3 |
| Harikanassou | Niabéré Bella Peulh      | 183  |   | 1 |   | 1 | 1 |   | 2 |
| Harikanassou | Niabéré Djambé           | 1123 |   | 1 |   | 1 |   |   |   |
| Harikanassou | Niabéré Kaina            | 1144 |   | 1 | 1 | 1 |   | 1 | 2 |
| Harikanassou | Niembéré Kaina           | 1144 | 1 |   |   | 1 |   |   |   |

## Climate 2018

|               |                             |      |   |   |   |   |   |   |   |
|---------------|-----------------------------|------|---|---|---|---|---|---|---|
| Harikanassou  | Niabéré Moulay Djerma       | 1113 | 1 | 1 | 1 |   |   |   | 2 |
| Harikanassou  | Nilley Koira                | 369  | 1 | 1 |   |   | 1 |   | 2 |
| Harikanassou  | Oulahal Peulh               | 137  | 1 | 1 |   | 1 | 1 |   | 3 |
| Harikanassou  | Oulhal Djerma               | 340  | 1 | 1 |   | 1 | 1 |   | 3 |
| Harikanassou  | Samdé Moussa                | 251  | 1 | 1 |   |   |   |   |   |
| Harikanassou  | Samdé Saidou                | 136  | 1 | 1 |   |   |   |   |   |
| Harikanassou  | Tombo Peulh                 | 508  | 1 | 1 |   |   |   |   |   |
| Harikanassou  | Wawaré                      | 150  | 1 | 1 |   |   |   |   |   |
| Harikanassou  | Zagoré Djerma               | 645  | 1 | 1 |   |   | 1 |   | 2 |
| Kankandi      | Bangoukokou                 | 985  | 1 |   |   |   |   |   | 1 |
| Kankandi      | Bongouroual                 | 485  | 1 |   |   |   |   |   | 1 |
| Kankandi      | Guiribani Koira             | 387  | 1 |   |   |   |   |   | 1 |
| Kankandi      | Kankandi                    | 971  | 1 | 1 | 1 |   |   |   |   |
| Kankandi      | Kankandi                    | 971  | 1 |   |   |   |   |   | 1 |
| Kankandi      | Kobial                      | 130  | 1 |   |   |   |   |   | 1 |
| Kankandi      | Samba Koira                 | 608  | 1 |   |   |   |   |   | 1 |
| Kankandi      | Souda Ahijo                 | 565  | 1 |   |   |   |   |   | 1 |
| Kankandi      | Souda Peulh                 | 538  | 1 |   |   |   |   |   | 1 |
| Kankandi      | Souda Zarma                 | 158  | 1 |   |   |   |   |   | 1 |
| Kankandi      | Tchamey                     | 135  | 1 |   |   |   |   |   | 1 |
| Kankandi      | Were Djatamé Peulh          | 217  | 1 |   |   |   |   |   | 1 |
| Karakara      | Abdoulazi                   | 740  | 1 | 1 |   | 1 | 1 | 1 | 4 |
| Karakara      | Agonga                      | 688  | 1 |   |   |   | 1 | 1 | 2 |
| Karakara      | Angoal Dambo                | 557  | 1 | 1 | 1 | 1 | 1 | 1 | 5 |
| Karakara      | Angoal kadé                 | 248  | 1 |   |   |   | 1 | 1 | 2 |
| Karakara      | Angoal labboua              | 681  | 1 |   |   | 1 |   | 1 | 2 |
| Karakara      | Angoual Damagani            | 830  | 1 | 1 |   |   | 1 |   | 2 |
| Karakara      | Angoual Doua Abarchi        | 297  | 1 |   |   | 1 |   |   |   |
| Karakara      | Angoual Doua Babba          | 260  | 1 |   |   | 1 | 1 |   | 2 |
| Karakara      | Angoual Gao                 | 148  | 1 |   |   | 1 | 1 | 1 | 3 |
| Karakara      | Angoual Issaka              | 576  | 1 |   | 1 | 1 | 1 |   | 3 |
| Karakara      | Angoual Leilaba             | 471  | 1 |   |   | 1 |   |   |   |
| Karakara      | Angoual Leilaba             | 471  | 1 |   |   |   | 1 | 1 | 2 |
| Karakara      | Angoual Mayaou              | 195  | 1 |   |   | 1 | 1 | 1 | 3 |
| Karakara      | Angoul Doua Abarchi         | 297  | 1 |   |   |   | 1 |   |   |
| Karakara      | Angoula Dangné              | 466  | 1 |   |   |   | 1 |   |   |
| Karakara      | Bourgami                    | 512  | 1 |   |   | 1 | 1 | 1 | 3 |
| Karakara      | Chirimbaou                  | 396  | 1 |   |   | 1 | 1 | 1 | 4 |
| Karakara      | Dogondagi                   | 474  | 1 | 1 |   |   |   |   |   |
| Karakara      | Gouma                       | 446  | 1 |   |   |   | 1 |   |   |
| Karakara      | Guigane                     | 433  | 1 |   |   | 1 |   |   |   |
| Karakara      | Illéla                      | 845  | 1 |   |   |   | 1 | 1 | 3 |
| Karakara      | Illéla Goudia               | 321  | 1 |   | 1 |   |   |   |   |
| Karakara      | Kalgo                       | 2546 | 1 |   | 1 |   | 1 | 1 | 3 |
| Karakara      | Kara Kara                   | 2634 | 1 | 1 | 1 | 1 | 1 | 1 | 6 |
| Karakara      | Kizamou                     | 1069 | 1 | 1 | 1 | 1 | 1 |   | 4 |
| Kara Kara     | Koudourou                   | 2377 | 1 | 1 |   | 1 |   |   |   |
| Karakara      | Koudourou                   | 2377 | 1 | 1 |   | 1 | 1 | 1 | 4 |
| Karakara      | Léguéré                     | 646  | 1 | 1 | 1 | 1 | 1 |   | 4 |
| Karakara      | Madotchiné                  | 712  | 1 |   | 1 | 1 | 1 | 1 | 4 |
| Karakara      | Mallé                       | 506  | 1 |   |   | 1 | 1 | 1 | 3 |
| Karakara      | Massama                     | 1175 | 1 | 1 |   | 1 | 1 | 1 | 4 |
| Karakara      | Matankari 1                 | 449  | 1 |   |   | 1 | 1 | 1 | 4 |
| Karakara      | Matankari 2                 | 732  | 1 |   |   | 1 | 1 | 1 | 4 |
| Karakara      | Nassarawa                   | 292  | 1 |   |   |   | 1 | 1 | 2 |
| Karakara      | Rouga Tsamia                | 551  | 1 |   |   | 1 |   | 1 | 2 |
| Karakara      | Tombo Bizaozaou             | 551  | 1 |   |   | 1 | 1 | 1 | 3 |
| Karakara      | Tombo Bozari                | 595  | 1 |   |   | 1 | 1 | 1 | 3 |
| Karakara      | Tombo Mouza                 | 410  | 1 |   | 1 |   | 1 |   | 2 |
| Karakara      | Tombo Na Maine (T. Nameini) | 412  | 1 |   |   | 1 | 1 | 1 | 3 |
| Karakara      | Yeldou                      | 2020 | 1 | 1 | 1 |   | 1 | 1 | 4 |
| Kargui Bangou | Bodo Sanke                  | 1    |   | 1 |   |   |   |   |   |
| Kargui Bangou | Bolbol                      | 1    |   |   |   |   | 1 |   |   |

## Climate 2018

|               |                             |      |   |   |   |   |   |   |   |
|---------------|-----------------------------|------|---|---|---|---|---|---|---|
| Kargui Bangou | Bolbol Kodi                 | 339  |   | 1 | 1 | 1 |   |   | 2 |
| Kargui Bangou | Bolbol Manga                | 59   |   | 1 | 1 |   |   |   |   |
| Kargui Bangou | Bolbol Marafa               | 393  |   | 1 | 1 |   | 1 |   | 2 |
| Kargui Bangou | Bouroum                     | 752  |   | 1 | 1 |   |   |   |   |
| Kargui Bangou | Dey Tegui Hamani            | 246  |   | 1 |   | 1 | 1 |   | 2 |
| Kargui Bangou | Deykougou Est               | 410  |   | 1 | 1 |   |   |   |   |
| Kargui Bangou | Dormi Koara                 | 257  |   | 1 | 1 |   |   |   |   |
| Kargui Bangou | Faran Koira                 | 290  |   | 1 |   |   | 1 |   |   |
| Kargui Bangou | Garbey Koara                | 601  |   | 1 | 1 |   |   | 1 | 2 |
| Kargui Bangou | Gnandou koara               | 500  |   | 1 |   |   | 1 |   |   |
| Kargui Bangou | Goumendey                   | 1568 |   | 1 |   |   | 1 |   |   |
| Kargui Bangou | Gueda Koira                 | 455  |   | 1 |   | 1 |   |   |   |
| Kargui Bangou | Hima Dey                    | 951  | 1 |   | 1 |   | 1 |   |   |
| Kargui Bangou | Hima Dey                    | 951  |   | 1 |   | 1 |   | 1 | 2 |
| Kargui Bangou | Kargui Bangou               | 2141 | 1 |   | 1 |   | 1 |   |   |
| Kargui Bangou | Kargui Bangou               | 2141 |   | 1 |   | 1 |   |   |   |
| Kargui Bangou | Kata Babadey                | 1253 | 1 |   |   |   | 1 |   |   |
| Kargui Bangou | Katababa dey                | 1046 |   | 1 |   |   |   | 1 | 1 |
| Kargui Bangou | Kobe Koira                  | 455  |   | 1 |   |   | 1 |   | 2 |
| Kargui Bangou | Komdi bangou                | 619  |   | 1 |   |   |   | 1 | 1 |
| Kargui Bangou | Korombe Koira               | 303  |   | 1 |   | 1 | 1 | 1 | 3 |
| Kargui Bangou | Maiyaki Koira               | 285  |   | 1 |   | 1 |   |   |   |
| Kargui Bangou | Mamoudou Koara              | 1153 | 1 |   |   |   | 1 |   |   |
| Kargui Bangou | Mamoudou koira              | 1271 |   | 1 |   |   |   | 1 | 1 |
| Kargui Bangou | Mayel                       | 410  |   | 1 |   |   |   | 1 | 1 |
| Kargui Bangou | Moussa Koira                | 581  |   | 1 |   | 1 |   |   | 2 |
| Kargui Bangou | Moussa Koukou Kouara        | 630  | 1 |   |   |   | 1 |   |   |
| Kargui Bangou | Niandou Koira               | 414  |   | 1 |   | 1 | 1 |   | 2 |
| Kargui Bangou | Raba Zarma                  | 730  |   | 1 |   |   |   |   | 1 |
| Kargui Bangou | Sabara Dey                  | 111  | 1 |   | 1 |   | 1 |   |   |
| Kargui Bangou | Sabara Dey                  | 111  |   | 1 |   | 1 |   |   |   |
| Kargui Bangou | Sabka Gozi                  | 438  |   | 1 |   | 1 |   |   |   |
| Kargui Bangou | Sabka Yerima                | 549  |   | 1 |   |   |   |   | 1 |
| Kargui Bangou | Sankindiadey (Sarkindiadey) | 300  |   | 1 |   | 1 |   |   |   |
| Kargui Bangou | Shada Garin Bagouma         | 349  |   | 1 |   | 1 |   |   |   |
| Kargui Bangou | Sogossa Karsani             | 1251 |   | 1 |   | 1 | 1 |   | 2 |
| Kargui Bangou | Son Allah koara             | 958  |   | 1 |   | 1 |   | 1 | 1 |
| Kargui Bangou | Son Allah Kouara            | 785  | 1 |   |   |   | 1 |   |   |
| Kargui Bangou | Tamo Koira                  | 1236 |   | 1 |   |   | 1 |   |   |
| Kargui Bangou | Tchiangalla                 | 1438 |   | 1 |   |   |   |   | 1 |
| Kargui Bangou | Tombo Barke                 | 235  |   | 1 |   | 1 |   | 1 | 2 |
| Kargui Bangou | Tombo Seida                 | 91   | 1 |   |   | 1 |   |   |   |
| Kargui Bangou | Tombo Tafa                  | 632  |   | 1 |   | 1 |   |   | 1 |
| Kargui Bangou | Tombotseyda                 | 100  |   | 1 |   |   |   | 1 |   |
| Kargui Bangou | Tounga Maiyaki              | 928  |   | 1 |   | 1 | 1 | 1 | 3 |
| Kargui Bangou | Tounga Mayaki               | 928  | 1 |   |   | 1 |   |   |   |
| Kargui Bangou | Walio Koira                 | 707  |   | 1 |   | 1 |   |   |   |
| Kargui Bangou | Wankoye Koira               | 427  |   | 1 |   | 1 | 1 |   | 2 |
| Kargui Bangou | Yello Beri                  | 764  |   | 1 |   | 1 |   |   |   |
| Kargui Bangou | Yélokeyna                   | 547  |   | 1 |   |   |   | 1 |   |
| Kargui Bangou | Yolley Koira                | 243  |   | 1 |   | 1 | 1 |   | 2 |
| Kargui Bangou | Zabia Koira                 | 357  |   | 1 |   | 1 |   |   |   |
| Kargui Bangou | Zaborize Dey                | 1048 |   | 1 |   | 1 |   |   |   |
| Kargui Bangou | Zanga Babadey               | 971  |   | 1 | 1 | 1 |   |   |   |
| Kargui Bangou | Zango Babadey Banizoumb     | 971  | 1 |   |   |   | 1 |   |   |
| Kieche        | Angoual Na Ana Peulh        | 382  |   | 1 | 1 |   |   | 1 |   |
| Kieche        | Angoula Na Anaji            | 382  |   | 1 |   | 1 |   | 1 | 2 |
| Kieche        | Baboursayé                  | 249  |   | 1 |   |   |   | 1 |   |
| Kieche        | Bado                        | 156  |   | 1 |   |   |   | 1 |   |
| Kieche        | Bakar Kassa                 | 584  |   | 1 |   | 1 | 1 | 1 | 3 |
| Kieche        | Bakin Tapki                 | 1402 | 1 |   | 1 |   |   | 1 |   |
| Kieche        | Bakin Tapki                 | 1402 |   | 1 |   |   |   | 1 |   |
| Kieche        | Biraye (Garin Mallam)       | 685  | 1 |   |   |   |   | 1 |   |

|        |                              |      |   |   |   |   |   |   |   |
|--------|------------------------------|------|---|---|---|---|---|---|---|
| Kieche | Bouka Koré                   | 1    |   |   |   | 1 |   |   |   |
| Kieche | Dangari                      | 705  |   | 1 |   | 1 | 1 | 2 |   |
| Kieche | Darogi Dambo                 | 302  |   | 1 | 1 | 1 | 1 | 3 |   |
| Kieche | Darogi Massoyi               | 1031 |   | 1 |   |   | 1 |   |   |
| Kieche | Darogi Tagara                | 258  |   | 1 |   |   | 1 |   |   |
| Kieche | DarogiI Massoyi (D. Massoyi) | 431  | 1 |   |   | 1 |   |   |   |
| Kieche | Darogidambo (Darog Dambo)    | 302  | 1 |   |   | 1 |   |   |   |
| Kieche | Dogon Gao                    | 825  |   | 1 |   |   |   | 1 |   |
| Kieche | Gagila (G. Mai Fala)         | 1741 |   | 1 |   | 1 |   |   |   |
| Kieche | Gazila                       |      | 1 |   |   | 1 |   |   |   |
| Kieche | Gouala                       | 1067 |   | 1 |   | 1 |   |   |   |
| Kieche | Houmawa                      | 1031 | 1 |   | 1 | 1 |   |   |   |
| Kieche | Houmawa                      | 1031 |   | 1 |   | 1 |   |   |   |
| Kieche | Illela Goudia                | 565  |   | 1 | 1 |   |   |   |   |
| Kieche | Jigola (Jougala)             | 1166 |   | 1 | 1 | 1 | 1 | 2 |   |
| Kieche | Jougala                      | 1166 | 1 |   |   | 1 |   |   |   |
| Kieche | Jigola Peulh                 | 96   |   | 1 | 1 |   |   |   |   |
| Kieche | Kalon Mota                   | 499  |   | 1 | 1 | 1 | 1 | 2 |   |
| Kieche | Kieche                       | 2500 | 1 |   | 1 | 1 |   |   |   |
| Kieche | Kieche                       | 2500 |   | 1 |   | 1 |   |   |   |
| Kieche | Koniko Rindo                 | 335  |   | 1 | 1 | 1 | 1 | 2 |   |
| Kieche | Konko Rindo                  | 335  | 1 |   |   | 1 |   |   |   |
| Kieche | Kouakouare                   | 352  |   | 1 |   |   |   | 1 |   |
| Kieche | Makera                       | 530  |   | 1 | 1 |   |   |   |   |
| Kieche | Makera Peulh                 | 550  |   | 1 | 1 |   |   |   |   |
| Kieche | Mazoubi                      | 1483 |   | 1 | 1 | 1 | 1 | 2 |   |
| Kieche | Noufawa                      | 558  | 1 |   |   | 1 |   |   |   |
| Kieche | Rouda Adoua                  | 851  | 1 |   | 1 | 1 |   |   |   |
| Kieche | Rouda Adoua                  | 851  |   | 1 | 1 |   |   |   |   |
| Kieche | Sabongari                    | 102  |   | 1 |   |   | 1 | 1 | 2 |
| Kieche | Sandraoua                    |      | 1 |   |   | 1 |   |   |   |
| Kieche | Tachadagna                   |      | 1 |   |   | 1 |   |   |   |
| Kieche | Takare                       | 167  |   | 1 | 1 | 1 |   | 2 |   |
| Kieche | Takouindawa I                | 808  |   | 1 | 1 | 1 | 1 | 3 |   |
| Kieche | Takouindawa II               | 524  |   | 1 | 1 | 1 | 1 | 3 |   |
| Kieche | Tombon Kasso                 | 701  |   | 1 | 1 | 1 |   | 2 |   |
| Kieche | Tsandarawa                   | 466  |   | 1 |   | 1 |   |   |   |
| Kieche | Zagbou                       |      | 1 |   |   | 1 |   |   |   |
| Kiota  | Alkawal Peulh                | 193  |   | 1 | 1 | 1 | 1 | 2 |   |
| Kiota  | Alkawal Zarma                | 283  |   | 1 | 1 | 1 | 1 | 3 |   |
| Kiota  | Balaré                       | 537  |   | 1 | 1 | 1 | 1 | 2 |   |
| Kiota  | Bangario Moussa              | 795  | 1 |   | 1 | 1 |   |   |   |
| Kiota  | Bangario Moussa              | 795  |   | 1 | 1 | 1 | 1 | 3 |   |
| Kiota  | Bangario Peulh               | 92   |   | 1 | 1 | 1 |   | 2 |   |
| Kiota  | Bangario Zarma               | 339  |   | 1 | 1 | 1 | 1 | 3 |   |
| Kiota  | Bangario Zou                 | 486  | 1 |   | 1 | 1 |   |   |   |
| Kiota  | Bangario Zou                 | 486  |   | 1 | 1 | 1 | 1 | 3 |   |
| Kiota  | Goumadey                     | 540  |   | 1 | 1 | 1 | 1 | 3 |   |
| Kiota  | Kalla Peulh                  | 330  |   | 1 | 1 | 1 | 1 | 3 |   |
| Kiota  | Kalla Zarma (Beri)           | 278  |   | 1 | 1 | 1 | 1 | 3 |   |
| Kiota  | Kiota Mayaki                 | 630  |   | 1 | 1 | 1 | 1 | 4 |   |
| Kiota  | Kiota Oumarou                | 1297 | 1 |   | 1 | 1 |   |   |   |
| Kiota  | Kiota Oumarou                | 1297 |   | 1 | 1 | 1 | 1 | 4 |   |
| Kiota  | Kiota Peulh                  | 403  |   | 1 | 1 | 1 | 1 | 3 |   |
| Kiota  | Kiota Touareg                | 455  |   | 1 | 1 | 1 | 1 | 3 |   |
| Kiota  | Kissin Kissin                | 462  |   | 1 | 1 | 1 | 1 | 3 |   |
| Kiota  | Kokitamou                    | 426  |   | 1 | 1 | 1 | 1 | 2 |   |
| Kiota  | Kolbou peulh                 | 417  |   | 1 | 1 | 1 | 1 | 4 |   |
| Kiota  | Kolbou Zarma                 | 1764 | 1 |   | 1 | 1 |   |   |   |
| Kiota  | Kolbou Zarma                 | 1764 |   | 1 | 1 | 1 | 1 | 4 |   |
| Kiota  | Koubou Koira Zarma           | 426  |   | 1 | 1 | 1 | 1 | 2 |   |
| Kiota  | Malarey Peulh                | 171  |   | 1 | 1 | 1 | 1 | 3 |   |
| Kiota  | Malarey Zarma                | 413  |   | 1 | 1 | 1 | 1 | 2 |   |

## Climate 2018

|              |                             |      |   |   |   |   |   |   |
|--------------|-----------------------------|------|---|---|---|---|---|---|
| Kiota        | Nazamné                     | 999  | 1 | 1 | 1 | 1 | 1 | 4 |
| Kiota        | Oudé Ali                    | 607  | 1 |   | 1 |   |   |   |
| Kiota        | Oudé Ali Peulh              | 266  | 1 |   | 1 | 1 | 1 | 3 |
| Kiota        | Oudé Ali Zarma              | 238  | 1 |   | 1 | 1 |   | 2 |
| Kiota        | Oudé Bombey Peulh           | 159  | 1 |   | 1 | 1 |   | 2 |
| Kiota        | Oudé Dourfey Peulh          | 228  | 1 |   | 1 | 1 |   | 2 |
| Kiota        | Oudé Dourfey Zarma          | 228  | 1 |   | 1 | 1 |   | 2 |
| Kiota        | Oudé Elhadji                | 85   | 1 |   | 1 | 1 |   | 2 |
| Kiota        | Oudé Saibou                 | 707  | 1 |   | 1 | 1 |   | 2 |
| Kiota        | Tombo Gabdakoye             | 399  | 1 |   | 1 | 1 | 1 | 3 |
| Kore Mairoua | Boureimi                    | 1861 | 1 | 1 |   | 1 |   | 2 |
| Kore Mairoua | Garin Kanna                 | 685  | 1 |   |   | 1 |   |   |
| Kore Mairoua | Kore Mairoua                | 7388 | 1 |   |   |   | 1 |   |
| Kore Mairoua | Toudou                      | 146  | 1 |   | 1 |   |   |   |
| Koré Mairoua | Angoual Dar Baare           | 900  | 1 | 1 |   | 1 |   | 2 |
| Koré Mairoua | Angoual Taoura              | 317  | 1 | 1 | 1 |   |   | 2 |
| Koré Mairoua | Badifa                      | 1299 | 1 | 1 | 1 | 1 |   | 3 |
| Koré Mairoua | Banguiro                    | 364  | 1 | 1 |   | 1 | 1 | 3 |
| Koré Mairoua | Banizoumboun Issa           | 548  | 1 | 1 |   |   |   |   |
| Koré Mairoua | Barebari Doula              | 593  | 1 | 1 | 1 | 1 | 1 | 5 |
| Koré Mairoua | Baziga                      | 232  | 1 | 1 |   |   |   |   |
| Koré Mairoua | Bounzoum                    | 470  | 1 | 1 |   | 1 | 1 | 3 |
| Koré Mairoua | Boureimi                    | 1861 | 1 | 1 |   |   |   |   |
| Koré Mairoua | Chédam                      | 221  | 1 | 1 | 1 | 1 | 1 | 4 |
| Koré Mairoua | Doula                       | 756  | 1 | 1 |   | 1 | 1 | 4 |
| Koré Mairoua | Gandabala                   | 109  | 1 |   | 1 |   |   |   |
| Koré Mairoua | Garanga Doula               | 694  | 1 | 1 | 1 | 1 | 1 | 5 |
| Koré Mairoua | Garin Aouta                 | 757  | 1 |   | 1 | 1 | 1 | 3 |
| Koré Mairoua | Garin Dan Bina              | 285  | 1 |   |   | 1 | 1 | 2 |
| Koré Mairoua | Garin Gargoua               | 200  | 1 |   | 1 | 1 |   | 2 |
| Koré Mairoua | Garin Kadadé                | 441  | 1 |   |   | 1 | 1 | 2 |
| Koré Mairoua | Garin Mallam (G.M. Dagaina) | 239  | 1 | 1 |   |   |   |   |
| Koré Mairoua | Garin Mouskouri             | 132  | 1 |   | 1 |   |   |   |
| Koré Mairoua | Golo Soli                   | 843  | 1 | 1 |   |   |   |   |
| Koré Mairoua | Goubawa                     | 1314 | 1 |   | 1 |   |   |   |
| Koré Mairoua | Hamdallaye                  | 635  | 1 | 1 | 1 | 1 |   | 3 |
| Koré Mairoua | Haoussawa                   | 694  | 1 |   | 1 |   |   |   |
| Koré Mairoua | Illela                      | 25   | 1 | 1 |   |   |   |   |
| Koré Mairoua | Imanan Bani Zoumbou         | 575  | 1 | 1 | 1 |   |   | 2 |
| Koré Mairoua | Kaini kougoum               | 493  | 1 |   | 1 | 1 |   | 2 |
| Koré Mairoua | Korémairoua                 | 7388 | 1 |   | 1 | 1 | 1 | 4 |
| Koré Mairoua | Korongobey                  | 240  | 1 | 1 | 1 | 1 | 1 | 4 |
| Koré Mairoua | Kouakore                    | 576  | 1 |   |   |   | 1 |   |
| Koré Mairoua | Kouka Namaizari             | 462  | 1 |   | 1 |   |   |   |
| Koré Mairoua | Koukoki                     | 789  | 1 |   | 1 | 1 | 1 | 3 |
| Koré Mairoua | Loma                        | 2615 | 1 |   | 1 | 1 |   | 2 |
| Koré Mairoua | Loma Peulh                  | 310  | 1 |   | 1 |   |   |   |
| Koré Mairoua | Maihérema                   | 674  | 1 | 1 |   | 1 |   | 2 |
| Koré Mairoua | Maihérema peul              | 296  | 1 | 1 |   | 1 |   | 2 |
| Koré Mairoua | Maikalgo                    | 3426 | 1 |   | 1 |   |   |   |
| Koré Mairoua | Sabon Yaye                  | 94   | 1 |   | 1 |   |   |   |
| Koré Mairoua | Tombo Magori                | 815  | 1 |   | 1 | 1 |   | 2 |
| Koré Mairoua | Toulou Roukougé             | 1514 | 1 |   | 1 | 1 |   | 2 |
| Koré Mairoua | Zela                        | 1392 | 1 |   | 1 | 1 |   | 2 |
| Koygolo      | Bangou Kiriey Bella         | 438  | 1 |   | 1 | 1 |   | 2 |
| Koygolo      | Banizoumbou                 | 589  | 1 |   | 1 | 1 | 1 | 3 |
| Koygolo      | Bouloga Peulh               | 234  | 1 |   | 1 | 1 | 1 | 3 |
| Koygolo      | Bouloga Zarma               | 544  | 1 |   | 1 | 1 | 1 | 3 |
| Koygolo      | Deytagui Goubé              | 653  | 1 |   | 1 | 1 | 1 | 4 |
| Koygolo      | Deytagui Sonrai             | 284  | 1 |   | 1 | 1 | 1 | 3 |
| Koygolo      | Gardi Beri Djerma           | 1070 | 1 |   |   |   |   | 1 |
| Koygolo      | Gardi Peulh                 | 187  | 1 |   |   |   |   | 1 |
| Koygolo      | Goubezéno                   | 2640 | 1 |   | 1 | 1 | 1 | 3 |

## Climate 2018

|         |                             |      |   |   |   |   |   |
|---------|-----------------------------|------|---|---|---|---|---|
| Koygolo | Goubezéno Haddi             | 121  | 1 | 1 | 1 | 1 | 3 |
| Koygolo | Goulbi                      | 124  | 1 | 1 | 1 |   | 2 |
| Koygolo | Karma Zarma                 | 1916 | 1 | 1 | 1 |   |   |
| Koygolo | Karma Zarma                 | 1916 | 1 | 1 | 1 |   | 2 |
| Koygolo | Kobekaina                   | 145  | 1 |   |   | 1 |   |
| Koygolo | Kobékiré                    | 456  | 1 | 1 | 1 | 1 | 4 |
| Koygolo | Koberi Bani Koubey          | 504  | 1 |   |   | 1 |   |
| Koygolo | Koberi Garba                | 1028 | 1 |   |   | 1 |   |
| Koygolo | Kola Bosseye                | 727  | 1 | 1 | 1 |   | 2 |
| Koygolo | Koubou Koira Bella          | 121  | 1 |   |   | 1 |   |
| Koygolo | Koubou Koira Djerma         | 426  | 1 |   |   | 1 |   |
| Koygolo | Koulou Peulh                | 282  | 1 | 1 | 1 | 1 | 4 |
| Koygolo | Koulou Zerma                | 623  | 1 | 1 | 1 | 1 | 4 |
| Koygolo | Mounbeina                   | 168  | 1 |   |   | 1 |   |
| Koygolo | Pounga                      | 264  | 1 | 1 | 1 | 1 | 3 |
| Koygolo | Safa Doungoumi              | 876  | 1 |   |   | 1 |   |
| Koygolo | Tadé Peulh                  | 590  | 1 | 1 | 1 | 1 | 3 |
| Koygolo | Tadé Zarma                  | 850  | 1 | 1 | 1 | 1 | 3 |
| Koygolo | Yagarmeye                   | 204  | 1 |   |   | 1 |   |
| Koygolo | Yeda                        | 1353 | 1 | 1 | 1 | 1 | 3 |
| Koygolo | Zouzou Béri                 | 2501 | 1 | 1 |   | 1 | 2 |
| Koygolo | Zouzou Sanay Peulh          | 351  | 1 | 1 | 1 | 1 | 3 |
| Loga    | Abadey                      | 397  | 1 |   |   | 1 |   |
| Loga    | Baba Koara                  | 444  | 1 |   | 1 |   |   |
| Loga    | Badara dey                  | 308  | 1 |   | 1 | 1 | 2 |
| Loga    | Badoka                      | 1785 | 1 |   | 1 | 1 | 2 |
| Loga    | Bakir Tombo (Tchire Garbey) | 826  | 1 |   | 1 | 1 | 2 |
| Loga    | Baziga Gorou                | 1085 | 1 |   |   | 1 |   |
| Loga    | Bouki                       | 2780 | 1 | 1 | 1 |   | 2 |
| Loga    | Dagaba Béri                 | 597  | 1 |   | 1 |   |   |
| Loga    | Danbazi                     | 543  | 1 | 1 |   |   |   |
| Loga    | Dar el sallam               | 1403 | 1 |   | 1 | 1 | 2 |
| Loga    | Darey                       | 357  | 1 | 1 |   |   |   |
| Loga    | Dey Tagui Beri              | 1207 | 1 | 1 |   | 1 | 2 |
| Loga    | Diney Béri                  | 204  | 1 | 1 |   | 1 | 2 |
| Loga    | Djibo Dey                   | 879  | 1 |   |   | 1 |   |
| Loga    | Djokoley                    | 179  | 1 |   |   | 1 |   |
| Loga    | Dorodji                     | 591  | 1 | 1 | 1 |   | 2 |
| Loga    | Fada 2                      | 414  | 1 | 1 |   |   |   |
| Loga    | Foni Koira                  | 509  | 1 |   |   | 1 |   |
| Loga    | Gabikane                    | 917  | 1 |   |   | 1 |   |
| Loga    | Garbey Gorou                | 682  | 1 |   | 1 | 1 | 3 |
| Loga    | Garssiko                    | 964  | 1 |   | 1 | 1 | 2 |
| Loga    | Gassi                       | 1197 | 1 |   | 1 | 1 | 2 |
| Loga    | Gonan Dadji                 | 239  | 1 |   |   | 1 |   |
| Loga    | Gonga Kaina                 | 377  | 1 |   | 1 | 1 | 3 |
| Loga    | Gongaizé Koara              | 790  | 1 |   | 1 | 1 | 3 |
| Loga    | Gongou Kaina (Koira)        | 311  | 1 |   | 1 |   |   |
| Loga    | Gongou Kooara               | 436  | 1 |   |   | 1 |   |
| Loga    | Gorou Guindé                | 529  | 1 |   | 1 | 1 | 3 |
| Loga    | Goubeydey                   | 445  | 1 |   |   | 1 |   |
| Loga    | Gounizé                     | 1926 | 1 |   | 1 | 1 | 2 |
| Loga    | Guindé Mario                | 507  | 1 |   |   | 1 |   |
| Loga    | Guiri Gorou                 | 1591 | 1 | 1 | 1 | 1 | 4 |
| Loga    | Hamdallaye                  | 164  | 1 |   |   | 1 |   |
| Loga    | Kambadey                    | 678  | 1 |   |   | 1 | 2 |
| Loga    | Katanga                     | 1014 | 1 |   |   | 1 | 2 |
| Loga    | Kato Koira                  | 434  | 1 |   | 1 | 1 | 2 |
| Loga    | Kibba Adamou                | 436  | 1 |   |   | 1 | 2 |
| Loga    | Kibba Tombo                 | 504  | 1 |   | 1 | 1 | 3 |
| Loga    | Kibba Mallam Kainé          | 1296 | 1 |   |   | 1 | 2 |
| Loga    | Kobollo (K. Yamba)          | 285  | 1 |   | 1 |   |   |
| Loga    | Kogorou                     | 878  | 1 | 1 | 1 |   | 2 |

## Climate 2018

|           |                          |       |   |   |   |   |   |   |
|-----------|--------------------------|-------|---|---|---|---|---|---|
| Loga      | Kokirey Modi             | 1080  | 1 |   | 1 | 1 | 1 | 3 |
| Loga      | Kokirey Peulh            | 236   | 1 |   | 1 |   |   |   |
| Loga      | Kokorbé                  | 1473  | 1 |   |   | 1 |   |   |
| Loga      | Kossey                   | 1768  | 1 |   |   | 1 | 1 | 2 |
| Loga      | Koubou Bangou Batouré    | 618   | 1 |   | 1 | 1 |   | 2 |
| Loga      | Koubou bangou Samssou    | 462   | 1 |   | 1 | 1 |   | 2 |
| Loga      | Kouro 1,2,3,4            | 2319  | 1 |   |   | 1 |   |   |
| Loga      | Kouro Beri               | 497   | 1 |   |   |   | 1 |   |
| Loga      | Kouro Kaina              | 491   | 1 |   |   |   | 1 |   |
| Loga      | Loga                     | 6771  | 1 |   | 1 |   | 1 | 2 |
| Loga      | Mara Kossey Bangou       |       | 1 |   | 1 |   |   |   |
| Loga      | Mayaki Koirra            | 871   | 1 |   | 1 |   |   |   |
| Loga      | Nazamne                  | 1481  | 1 |   | 1 | 1 |   | 2 |
| Loga      | Peulh Gandou             | 109   | 1 |   | 1 |   |   |   |
| Loga      | Sakouara                 | 545   | 1 |   |   |   | 1 |   |
| Loga      | Sekodey                  | 385   | 1 |   |   |   | 1 |   |
| Loga      | Sorko                    | 830   | 1 |   | 1 |   |   |   |
| Loga      | Tara Windi               | 1     |   |   | 1 |   |   |   |
| Loga      | Tchambou Guindé          | 329   | 1 |   | 1 | 1 | 1 | 3 |
| Loga      | Tchoulou                 | 490   | 1 |   | 1 |   | 1 | 2 |
| Loga      | Tombo Tamey              | 842   | 1 |   | 1 |   | 1 | 3 |
| Loga      | Wazir Koirra             | 664   | 1 |   | 1 |   | 1 | 2 |
| Loga      | Zonkoto Banda            | 660   | 1 |   | 1 |   |   |   |
| Matankari | Amouké                   | 416   | 1 |   |   | 1 |   |   |
| Matankari | Angoual Kara Doubalma    | 467   | 1 | 1 |   | 1 |   | 2 |
| Matankari | Angoual Koadéy (Koadaye) | 1027  | 1 | 1 | 1 | 1 | 1 | 3 |
| Matankari | Bagagi                   | 1889  | 1 | 1 |   | 1 |   |   |
| Matankari | Bagagi                   | 1889  | 1 | 1 |   | 1 | 1 | 3 |
| Matankari | Bare Bari                | 1188  | 1 |   | 1 |   |   |   |
| Matankari | Bourgouzou               | 1     |   |   |   | 1 |   |   |
| Matankari | Carré Roumbouki          | 567   | 1 | 1 |   | 1 |   | 2 |
| Matankari | Dan Guere                | 1     |   |   |   | 1 |   |   |
| Matankari | Doubalma Guida           | 413   | 1 |   |   | 1 |   |   |
| Matankari | Doumé (Doumme)           | 774   | 1 |   |   | 1 | 1 | 2 |
| Matankari | Gaouna                   | 654   | 1 |   | 1 |   |   |   |
| Matankari | Garanga                  | 1412  | 1 | 1 |   | 1 |   |   |
| Matankari | Garanga                  | 1412  | 1 | 1 |   | 1 |   | 2 |
| Matankari | Garin Bando              | 649   | 1 | 1 |   | 1 |   | 2 |
| Matankari | Garin Gouala             | 997   | 1 | 1 |   | 1 |   | 2 |
| Matankari | Guezangna                | 1456  | 1 |   |   | 1 | 1 | 2 |
| Matankari | Hountou                  | 295   | 1 |   |   | 1 |   |   |
| Matankari | Issa Tchichi             | 1     |   |   |   | 1 |   |   |
| Matankari | Kasko (K. Peulh)         | 304   | 1 | 1 |   |   |   |   |
| Matankari | Kofan Kouka              | 337   | 1 |   |   | 1 | 1 | 2 |
| Matankari | Konfata                  | 268   | 1 |   | 1 |   |   |   |
| Matankari | Koukadim                 | 478   | 1 |   | 1 |   |   |   |
| Matankari | Koukouki Bouzou          | 630   | 1 | 1 |   |   |   |   |
| Matankari | Makera II                | 645   | 1 | 1 |   | 1 |   |   |
| Matankari | Makera II                | 635   | 1 | 1 |   | 1 | 1 | 3 |
| Matankari | Matankari                | 14261 | 1 | 1 |   | 1 | 1 | 3 |
| Matankari | Matankari                | 14261 | 1 |   |   |   | 1 |   |
| Matankari | Natchira                 | 270   | 1 | 1 |   |   |   |   |
| Matankari | Roumbouki Doubalma       | 329   | 1 |   |   | 1 |   |   |
| Matankari | Roumbouki Lokoyo         | 523   | 1 | 1 |   | 1 |   | 2 |
| Matankari | Sabarou                  | 316   | 1 | 1 |   | 1 |   | 2 |
| Matankari | Salga Sabon Gari         | 262   | 1 | 1 |   | 1 | 1 | 4 |
| Matankari | Salga Toulli (Salga 1)   | 939   | 1 | 1 |   | 1 | 1 | 4 |
| Matankari | Tagara                   | 891   | 1 | 1 |   | 1 |   | 2 |
| Mokko     | Babiadey                 | 1062  | 1 | 1 |   |   |   |   |
| Mokko     | Batako                   | 1791  | 1 | 1 | 1 | 1 | 1 | 6 |
| Mokko     | Dambindi (Dan Bindi)     | 711   | 1 | 1 |   |   |   | 2 |
| Mokko     | Dareki I (Koirra Tegui)  | 1064  | 1 | 1 | 1 | 1 | 1 | 6 |
| Mokko     | Dareki II                | 1679  | 1 | 1 |   | 1 | 1 | 3 |

## Climate 2018

|           |                         |      |   |   |   |   |   |   |   |
|-----------|-------------------------|------|---|---|---|---|---|---|---|
| Mokko     | Diambabadey             | 1426 | 1 | 1 |   |   |   | 1 | 2 |
| Mokko     | Doundougonga            | 1341 | 1 | 1 | 1 | 1 | 1 | 1 | 6 |
| Mokko     | Gabi Koira              | 60   | 1 | 1 |   |   |   | 1 | 2 |
| Mokko     | Gonga Karimou           | 259  | 1 | 1 |   |   |   |   |   |
| Mokko     | Gonga Moussa            | 475  | 1 |   | 1 | 1 | 1 | 1 | 5 |
| Mokko     | Gorou Beri Bagna        | 739  | 1 | 1 | 1 | 1 |   |   | 3 |
| Mokko     | Goulma Gabi             | 1087 | 1 | 1 |   |   |   |   |   |
| Mokko     | Gourou Beri Franc       | 381  | 1 | 1 | 1 |   |   |   | 2 |
| Mokko     | Hamka Seyni             | 616  | 1 | 1 |   |   |   |   |   |
| Mokko     | Hamka Tombo             | 1242 | 1 | 1 |   |   |   |   |   |
| Mokko     | Kattize                 | 633  | 1 | 1 | 1 | 1 |   |   | 3 |
| Mokko     | Kobe Azia               | 804  | 1 | 1 |   |   |   |   |   |
| Mokko     | Kobe Gatari             | 780  | 1 | 1 |   |   |   |   |   |
| Mokko     | Kobéri                  | 914  | 1 | 1 |   |   | 1 |   | 2 |
| Mokko     | Koki Fafa               | 489  | 1 | 1 |   |   |   |   |   |
| Mokko     | Koli Bagonga            | 1263 | 1 | 1 |   |   |   |   |   |
| Mokko     | Koutoufani              | 2345 | 1 | 1 |   |   |   |   |   |
| Mokko     | Mokko                   | 4447 | 1 | 1 |   |   |   | 1 | 2 |
| Mokko     | Saboudey                | 1245 | 1 | 1 |   |   |   |   |   |
| Mokko     | Saney                   | 749  | 1 | 1 |   |   |   |   |   |
| Mokko     | Sangou                  | 470  | 1 | 1 | 1 | 1 |   |   | 3 |
| Mokko     | Sina Kouara             | 238  | 1 | 1 |   |   |   |   |   |
| Mokko     | Siniguinde              | 897  | 1 | 1 |   |   | 1 |   | 2 |
| Mokko     | Soudjeydey              | 1268 | 1 | 1 | 1 | 1 | 1 | 1 | 6 |
| Mokko     | Takara                  | 385  | 1 | 1 |   |   |   | 1 | 2 |
| Mokko     | Tchandey                | 565  | 1 | 1 |   | 1 |   |   | 2 |
| Mokko     | Tchirobi Dey            | 147  | 1 | 1 |   |   |   |   |   |
| Mokko     | Tchoulou                | 1485 | 1 | 1 | 1 | 1 | 1 |   | 4 |
| Mokko     | Tibbo Béri              | 2487 | 1 | 1 | 1 | 1 | 1 |   | 4 |
| Mokko     | Tokoye Komario          | 309  | 1 | 1 |   | 1 |   |   | 2 |
| Mokko     | Tombodjambé             | 1567 | 1 | 1 | 1 | 1 | 1 | 1 | 5 |
| Mokko     | Yaouna                  | 258  | 1 | 1 | 1 | 1 |   |   | 3 |
| Ngonga    | Barbé Peulh             | 459  | 1 |   |   | 1 |   |   |   |
| Ngonga    | Boulel Gaouri Modibo    | 388  | 1 |   |   | 1 |   |   |   |
| Ngonga    | Diawando                | 611  | 1 |   |   | 1 |   |   |   |
| Ngonga    | Doulouwel Djerma        | 112  | 1 |   |   |   |   | 1 |   |
| Ngonga    | Doulouwel Peulh         | 166  | 1 |   |   |   |   | 1 |   |
| Ngonga    | Gnourmay Kagourou Peulh | 535  | 1 |   |   | 1 |   |   |   |
| Ngonga    | HedaFaraka              | 569  | 1 |   |   | 1 |   | 1 | 2 |
| Ngonga    | Kanare                  | 2447 | 1 | 1 |   | 1 |   |   |   |
| Ngonga    | Kanare                  | 2447 | 1 |   |   | 1 |   | 1 | 2 |
| Sakadamna | Bakin Tombo             | 1503 | 1 |   |   |   | 1 |   |   |
| Sakadamna | Bakirikou               | 787  | 1 |   |   | 1 | 1 | 1 | 3 |
| Sakadamna | Bana koara              | 1001 | 1 |   |   |   |   | 1 |   |
| Sakadamna | Bangna Harey            | 863  | 1 | 1 | 1 | 1 | 1 | 1 | 5 |
| Sakadamna | Baro Koira              | 908  | 1 |   |   |   | 1 |   |   |
| Sakadamna | Borgou Sambou           | 899  | 1 | 1 |   |   | 1 |   | 2 |
| Sakadamna | Bozari koara            | 147  | 1 |   |   |   |   | 1 |   |
| Sakadamna | Damana                  | 151  | 1 |   |   |   | 1 |   |   |
| Sakadamna | Dantiangou              | 615  | 1 | 1 |   |   | 1 | 1 | 3 |
| Sakadamna | Diney zougou            | 114  | 1 |   |   |   |   | 1 |   |
| Sakadamna | Dinguidi Baro           | 1073 | 1 | 1 |   |   |   | 1 | 2 |
| Sakadamna | Djan Djan Koira         | 1541 | 1 |   |   |   | 1 |   |   |
| Sakadamna | Doko Tombo              | 521  | 1 |   | 1 |   |   | 1 | 2 |
| Sakadamna | Dolé Maourey dey        | 350  | 1 |   |   | 1 |   | 1 | 2 |
| Sakadamna | Gado Koira              | 1124 | 1 | 1 |   |   | 1 | 1 | 3 |
| Sakadamna | Galago Koira            | 511  | 1 |   |   |   | 1 | 1 | 2 |
| Sakadamna | Gombogandé Koara Zeno   | 235  | 1 |   |   |   | 1 |   |   |
| Sakadamna | Gondawal                | 194  | 1 |   |   |   |   | 1 |   |
| Sakadamna | Goubakoye Sirfi         | 932  | 1 |   |   | 1 |   |   |   |
| Sakadamna | Goubekoye Bana          | 1366 | 1 |   |   |   | 1 | 1 | 2 |
| Sakadamna | Goulma Hamani           | 789  | 1 |   |   |   | 1 |   |   |
| Sakadamna | Goulma Kourgueni        | 219  | 1 |   |   |   | 1 |   |   |

|           |                        |      |   |   |   |   |   |   |
|-----------|------------------------|------|---|---|---|---|---|---|
| Sakadamna | Goulma Yacouba         | 718  | 1 | 1 |   |   |   |   |
| Sakadamna | Gourinsi               | 520  | 1 | 1 |   |   |   |   |
| Sakadamna | Haidara Koira          | 822  | 1 | 1 | 1 | 1 | 1 | 2 |
| Sakadamna | Hamani Tabatt          | 608  | 1 | 1 | 1 | 1 | 1 | 4 |
| Sakadamna | Karsani koara          | 445  | 1 | 1 | 1 | 1 | 1 | 4 |
| Sakadamna | Koakoré Yamba          | 282  | 1 | 1 |   |   |   |   |
| Sakadamna | Koakore Yourmari       | 236  | 1 | 1 |   |   |   |   |
| Sakadamna | Kogarbey               | 822  | 1 | 1 |   |   |   |   |
| Sakadamna | Kossey                 | 228  | 1 |   |   |   | 1 |   |
| Sakadamna | Maigounia Koara        | 249  | 1 | 1 |   |   |   |   |
| Sakadamna | Maourey Dey Moussa     | 460  | 1 | 1 |   |   |   |   |
| Sakadamna | Maourey gorobanda      | 137  | 1 |   |   | 1 |   |   |
| Sakadamna | Maourey Sabi           | 203  | 1 |   |   | 1 |   |   |
| Sakadamna | Maraké                 | 383  | 1 | 1 |   |   |   |   |
| Sakadamna | Mokirey Koara          | 704  | 1 | 1 | 1 | 1 | 1 | 3 |
| Sakadamna | Mondoleyze Koara       | 1196 | 1 | 1 |   |   |   |   |
| Sakadamna | Mossi koara            | 260  | 1 |   |   | 1 |   |   |
| Sakadamna | N'gamou koara          | 423  | 1 |   |   | 1 | 1 | 2 |
| Sakadamna | Sabou Koira            | 417  | 1 | 1 |   |   |   |   |
| Sakadamna | Sakadamna              | 2278 | 1 | 1 | 1 | 1 | 1 | 3 |
| Sakadamna | Sarkin Daji Koira      | 602  | 1 | 1 | 1 |   |   | 2 |
| Sakadamna | Sidi Koira             | 672  | 1 | 1 | 1 |   |   | 2 |
| Sakadamna | Soudjedey              | 313  | 1 |   |   | 1 |   |   |
| Sakadamna | Talle Adamou           | 504  | 1 | 1 |   |   |   |   |
| Sakadamna | Talle Sofu             | 885  | 1 | 1 |   |   | 1 | 2 |
| Sakadamna | Tchoulou               | 1059 | 1 |   |   | 1 |   |   |
| Sakadamna | Tiouilan Hima          | 509  | 1 | 1 | 1 | 1 | 1 | 3 |
| Sakadamna | Tondigame Alfaga       | 704  | 1 |   | 1 |   |   |   |
| Sakadamna | Tondigame Kaninke      | 297  | 1 | 1 | 1 |   |   | 2 |
| Sakadamna | Tondigsme Issa         | 1105 | 1 |   | 1 | 1 | 1 | 2 |
| Sakadamna | Tounga Alfigay         | 727  | 1 |   |   |   | 1 |   |
| Sakadamna | Zola koara             | 125  | 1 |   |   | 1 |   |   |
| Sambéra   | Albora Koira           | 139  | 1 | 1 |   |   | 1 |   |
| Sambéra   | Albora Kouara (Koira)  | 139  | 1 |   | 1 |   |   |   |
| Sambéra   | Alfa Kouara II         | 310  | 1 |   | 1 |   |   |   |
| Sambéra   | August Koira           | 375  | 1 |   |   |   | 1 |   |
| Sambéra   | Bangaga (B. Rimaibe)   | 2102 | 1 |   | 1 |   |   |   |
| Sambéra   | Foma Tounga            | 675  | 1 |   | 1 |   |   |   |
| Sambéra   | Gazere Kouara          | 388  | 1 |   | 1 |   |   |   |
| Sambéra   | Illela                 | 250  | 1 |   | 1 |   |   |   |
| Sambéra   | Kayan Kaina            | 885  | 1 |   |   |   | 1 |   |
| Sambéra   | Kouassi (K. Dosso)     | 680  | 1 |   | 1 |   |   |   |
| Sambéra   | Koukada                | 175  | 1 | 1 |   |   |   |   |
| Sambéra   | Kouloulou              | 580  | 1 |   |   |   | 1 |   |
| Sambéra   | Larey (Larrey)         | 698  | 1 |   | 1 |   |   |   |
| Sambéra   | Maikada                | 1259 | 1 | 1 |   |   |   |   |
| Sambéra   | Oouna                  | 2855 | 1 |   |   |   | 1 |   |
| Sambéra   | Sakou Harou            | 1    |   |   | 1 |   |   |   |
| Sambéra   | Sambéra                | 1    |   |   | 1 |   |   |   |
| Sambéra   | Sambéra (Sambéra Zeno) | 2360 | 1 |   |   | 1 |   |   |
| Sambéra   | Tilli                  | 304  | 1 |   | 1 |   |   |   |
| Sambéra   | Tounga Elhadji Koira   | 1    |   |   | 1 |   |   |   |
| Sokorbé   | Bamey                  | 1872 | 1 |   | 1 | 1 | 1 | 4 |
| Sokorbé   | Baziga                 | 2120 | 1 |   |   |   | 1 |   |
| Sokorbé   | Dikki                  | 988  | 1 |   | 1 |   | 1 | 2 |
| Sokorbé   | Dourgouma              | 569  | 1 |   |   |   | 1 |   |
| Sokorbé   | Fandou Sekou Kouara    | 1905 | 1 |   |   | 1 | 1 | 2 |
| Sokorbé   | Farey Gorou Kaina      | 657  | 1 |   | 1 | 1 | 1 | 3 |
| Sokorbé   | Goubey                 | 749  | 1 |   |   |   | 1 |   |
| Sokorbé   | Goutoumbou             | 879  | 1 |   | 1 |   | 1 | 3 |
| Sokorbé   | Kalley                 | 909  | 1 |   | 1 |   | 1 | 3 |
| Sokorbé   | Kalley Dey Beri        | 939  | 1 |   |   |   | 1 |   |
| Sokorbé   | Kalley Dey Kaina       | 594  | 1 |   | 1 |   | 1 | 2 |

|               |                                   |      |   |   |   |   |   |
|---------------|-----------------------------------|------|---|---|---|---|---|
| Sokorbé       | Kimia Kouara                      | 383  | 1 |   | 1 | 1 | 2 |
| Sokorbé       | Kinney                            | 146  | 1 |   | 1 | 1 | 3 |
| Sokorbé       | Komdilli Beri                     | 948  | 1 |   | 1 | 1 | 2 |
| Sokorbé       | Komdilli Darey                    | 1298 | 1 |   | 1 | 1 | 2 |
| Sokorbé       | Madou                             | 1673 | 1 |   | 1 | 1 | 2 |
| Sokorbé       | Moussadey Beri                    | 6742 | 1 |   | 1 | 1 | 3 |
| Sokorbé       | Sinsan Issaka                     | 455  | 1 |   |   | 1 |   |
| Sokorbé       | Sinsan Koira Tegui                | 352  | 1 |   |   | 1 |   |
| Sokorbé       | Sinsan Koira Zeno                 | 600  | 1 |   |   | 1 |   |
| Sokorbé       | Sokorbe Peulh                     | 4358 | 1 |   | 1 | 1 | 4 |
| Sokorbé       | Wazey (Batchaka)                  | 500  | 1 |   |   | 1 |   |
| Soucoucoutane | Abdou Kessa                       | 969  | 1 | 1 | 1 |   | 2 |
| Soucoucoutane | Adoua Kessa                       | 969  | 1 |   |   | 1 |   |
| Soucoucoutane | Ague Dagna                        | 264  | 1 | 1 | 1 |   | 2 |
| Soucoucoutane | Agué Goumoundey                   | 683  | 1 | 1 | 1 |   | 2 |
| Soucoucoutane | Bajji                             | 441  | 1 | 1 | 1 | 1 | 4 |
| Soucoucoutane | Baraya (B. Saydou)                | 257  | 1 | 1 | 1 | 1 | 3 |
| Soucoucoutane | Bimin Lokoyo Peulh                | 397  | 1 | 1 |   | 1 | 3 |
| Soucoucoutane | Bouzouzou                         | 230  | 1 | 1 | 1 |   | 2 |
| Soucoucoutane | Dan Gari                          | 861  | 1 | 1 |   |   |   |
| Soucoucoutane | Doubalma Illéla                   | 640  | 1 |   | 1 | 1 | 2 |
| Soucoucoutane | Gadirga                           | 231  | 1 | 1 |   | 1 | 2 |
| Soucoucoutane | Gadirga Guida                     | 1266 | 1 |   |   |   | 1 |
| Soucoucoutane | Goubey / Goudey                   | 512  | 1 |   |   | 1 | 2 |
| Soucoucoutane | Kantcha I                         | 216  | 1 | 1 |   |   |   |
| Soucoucoutane | Kantcha I                         | 216  | 1 |   | 1 | 1 | 3 |
| Soucoucoutane | Kantcha II                        | 93   | 1 |   |   | 1 |   |
| Soucoucoutane | Kiada                             | 1    |   |   | 1 |   |   |
| Soucoucoutane | Kiada Goumandey                   | 534  | 1 |   |   | 1 |   |
| Soucoucoutane | Kida Kore (K. Kori Goumandey)     | 361  | 1 |   | 1 | 1 | 2 |
| Soucoucoutane | Kimassa / Sabara                  | 237  | 1 | 1 |   |   |   |
| Soucoucoutane | Kouassaye                         | 1110 | 1 | 1 | 1 |   | 2 |
| Soucoucoutane | Koundoutou                        | 100  | 1 |   | 1 |   |   |
| Soucoucoutane | Kourouroube (K. Dakaou)           | 549  | 1 | 1 |   | 1 | 2 |
| Soucoucoutane | Maiguebé                          | 1636 | 1 | 1 | 1 | 1 | 4 |
| Soucoucoutane | Maiguele (Maigube)                | 1636 | 1 |   |   | 1 |   |
| Soucoucoutane | Makera (Garin Mae Sadié)          | 262  | 1 |   | 1 | 1 | 2 |
| Soucoucoutane | Marina                            | 1686 | 1 | 1 | 1 | 1 | 4 |
| Soucoucoutane | Nassaroua                         | 2035 | 1 |   | 1 | 1 | 2 |
| Soucoucoutane | Niamey (Garin Dari)               | 394  | 1 |   |   | 1 |   |
| Soucoucoutane | Roumboukawa                       | 441  | 1 | 1 | 1 | 1 | 3 |
| Soucoucoutane | Sabara (S. Mota)                  | 505  | 1 | 1 | 1 | 1 | 3 |
| Soucoucoutane | Sagayé (Tsagayé)                  | 69   | 1 | 1 |   |   |   |
| Soucoucoutane | Sakourou (Sounkourou)             | 126  | 1 | 1 | 1 | 1 | 3 |
| Soucoucoutane | Soucoucoutane                     | 4595 | 1 | 1 | 1 | 1 | 3 |
| Soucoucoutane | Soukoukoutane                     | 4595 | 1 |   |   | 1 |   |
| Soucoucoutane | Tarsossa                          | 863  | 1 | 1 |   |   | 2 |
| Soucoucoutane | Toudou Gaoh                       | 536  | 1 | 1 |   | 1 | 2 |
| Soucoucoutane | Toudoun Baouchi                   | 842  | 1 |   | 1 | 1 | 3 |
| Soucoucoutane | Toullaye Doubalma                 | 442  | 1 | 1 | 1 | 1 | 3 |
| Soucoucoutane | Tsagae                            | 1    |   |   | 1 |   |   |
| Soucoucoutane | Wadata                            | 212  | 1 |   |   | 1 |   |
| Soucoucoutane | Yamay (Yemeye)                    | 394  | 1 |   |   | 1 |   |
| Tanda         | Albakayze                         | 395  | 1 | 1 | 1 | 1 | 3 |
| Tanda         | Albarkaize                        | 395  | 1 |   | 1 |   |   |
| Tanda         | Alfa Gaye Belindé (A.G. Fabangou) | 765  | 1 |   | 1 |   |   |
| Tanda         | Bangali                           | 274  | 1 |   | 1 |   |   |
| Tanda         | Bantali                           | 1    | 1 |   |   | 1 | 2 |
| Tanda         | Barfo Kambou                      | 1    |   |   |   | 1 |   |
| Tanda         | Barkel                            | 1    |   |   |   | 1 |   |
| Tanda         | Darfou Tounga                     | 411  | 1 |   |   |   | 1 |
| Tanda         | Ete                               | 1    |   |   |   |   | 1 |

## Climate 2018

|       |                                |      |   |   |   |   |   |   |
|-------|--------------------------------|------|---|---|---|---|---|---|
| Tanda | Firchia                        | 1    |   |   | 1 |   |   |   |
| Tanda | Gaberi                         | 1    |   |   |   | 1 |   |   |
| Tanda | Garbey                         | 1    |   |   |   |   |   | 1 |
| Tanda | Gueyoyi (Guayoy 1)             | 171  | 1 |   | 1 |   |   |   |
| Tanda | Kelele                         | 1    |   |   |   |   |   | 1 |
| Tanda | Koikore (Koikore)              | 654  | 1 |   |   |   |   | 1 |
| Tanda | Konwa                          | 287  | 1 |   | 1 | 1 |   | 2 |
| Tanda | Konza                          | 793  | 1 | 1 | 1 | 1 |   | 2 |
| Tanda | Konza                          | 793  |   | 1 |   | 1 |   |   |
| Tanda | Konzatagui                     | 1    |   |   |   | 1 |   |   |
| Tanda | Korwa                          |      | 1 |   |   |   |   | 1 |
| Tanda | Kouka Mailamba                 | 97   | 1 |   | 1 |   |   |   |
| Tanda | Koumbay Kambou                 | 1    |   |   | 1 |   |   |   |
| Tanda | Koura Tounga                   | 1    |   |   | 1 |   |   |   |
| Tanda | Kourbey                        | 394  | 1 |   |   | 1 | 1 | 2 |
| Tanda | Ladan Kouara (Ladan Koira)     | 999  | 1 |   |   |   | 1 |   |
| Tanda | Lete Goungou                   | 899  | 1 |   |   | 1 |   |   |
| Tanda | Lette                          | 899  |   | 1 |   | 1 |   |   |
| Tanda | Maba Tounga                    | 201  | 1 |   |   | 1 |   |   |
| Tanda | Magangama                      | 26   | 1 |   | 1 |   | 1 | 2 |
| Tanda | Mainga Tounga                  | 252  |   | 1 | 1 | 1 |   |   |
| Tanda | Mairiga Tounga                 | 252  | 1 |   |   | 1 |   |   |
| Tanda | Monbaye Tounga                 | 1794 | 1 |   | 1 | 1 |   | 2 |
| Tanda | Mongo Do (Mango Do)            | 473  | 1 |   |   |   |   | 1 |
| Tanda | Rounto Tanda                   | 564  | 1 |   | 1 | 1 | 1 | 3 |
| Tanda | Sia                            | 3554 | 1 |   |   |   |   | 1 |
| Tanda | Talambou                       | 368  | 1 |   |   |   |   | 1 |
| Tanda | Tanda                          | 8098 | 1 |   | 1 | 1 |   | 2 |
| Tanda | Tanda                          | 8098 |   | 1 |   | 1 |   |   |
| Tanda | Tassabonkoyi                   | 1    |   |   |   |   |   | 1 |
| Tanda | Tchelele                       | 249  | 1 |   |   | 1 |   |   |
| Tanda | Tchintoua Tounga               | 1    |   |   | 1 | 1 |   | 2 |
| Tanda | Tounga Darfou                  | 411  | 1 |   | 1 | 1 |   | 2 |
| Tanda | Tounga Gombi                   | 558  | 1 |   | 1 | 1 | 1 | 3 |
| Tanda | Tounga Goumbi                  | 558  |   | 1 |   | 1 |   |   |
| Tanda | Toungan Reni                   | 1    |   |   | 1 |   |   |   |
| Tanda | Wayakata                       | 1    |   |   | 1 |   |   |   |
| Tessa | Allassan Dey                   | 764  | 1 |   |   |   | 1 |   |
| Tessa | Alsana deye                    | 784  |   | 1 | 1 | 1 |   | 3 |
| Tessa | Badingui Koara                 | 343  |   | 1 | 1 | 1 |   | 2 |
| Tessa | Bakoube                        | 386  |   | 1 |   |   |   | 1 |
| Tessa | Dey Koukou Ouest (D.K.O. Fand) | 344  | 1 |   | 1 |   | 1 |   |
| Tessa | Dey Koukou Ouest Fand          | 344  |   | 1 |   | 1 |   | 2 |
| Tessa | Djimba Marounfa                | 404  |   | 1 |   | 1 |   |   |
| Tessa | Djobodey                       | 546  |   | 1 | 1 | 1 |   | 2 |
| Tessa | Falwel Tessa                   | 994  |   | 1 |   | 1 |   |   |
| Tessa | Farguédi                       | 605  |   | 1 | 1 |   |   |   |
| Tessa | Gabi Koydeye                   | 873  |   | 1 | 1 |   |   | 2 |
| Tessa | Ganda Koara                    | 549  |   | 1 | 1 |   |   | 2 |
| Tessa | Gourou Kaya                    | 336  |   | 1 | 1 | 1 |   | 2 |
| Tessa | Kobadeye Tessa                 | 1569 |   | 1 |   | 1 |   |   |
| Tessa | Koyababa Koara                 | 953  |   | 1 | 1 |   |   |   |
| Tessa | Leyley Gorou                   | 723  |   | 1 | 1 | 1 |   | 2 |
| Tessa | Mai Hatchiday                  | 1    |   |   |   |   | 1 |   |
| Tessa | Marafa Koira                   | 461  |   | 1 | 1 | 1 |   | 2 |
| Tessa | Mayaki Dey                     | 751  | 1 |   | 1 |   | 1 |   |
| Tessa | Mayaki Dey                     | 751  |   | 1 |   | 1 |   |   |
| Tessa | Noma Koira                     | 931  |   | 1 | 1 | 1 |   | 3 |
| Tessa | Satta Koira                    | 832  |   | 1 |   | 1 |   |   |
| Tessa | Sina Dey                       | 591  |   | 1 | 1 |   |   |   |
| Tessa | Sinadey                        | 945  | 1 |   |   | 1 |   |   |
| Tessa | Tessa                          | 2841 | 1 |   |   |   | 1 |   |
| Tessa | Tessa                          | 2841 |   | 1 | 1 |   |   | 2 |

## Climate 2018

|                |                        |      |   |   |   |   |   |   |
|----------------|------------------------|------|---|---|---|---|---|---|
| Tessa          | Tin-Tim                | 1014 | 1 | 1 | 1 |   | 1 | 3 |
| Tessa          | Tourobon               | 858  | 1 |   | 1 |   |   |   |
| Tessa          | Wassa Arbi             | 85   | 1 | 1 | 1 |   |   | 2 |
| Tibiri         | Achalafia              | 457  | 1 |   |   |   | 1 |   |
| Tibiri         | Afola                  | 1639 | 1 |   | 1 |   |   |   |
| Tibiri         | Angoual Magagi Doka    | 648  | 1 |   | 1 | 1 |   | 2 |
| Tibiri         | Angoual Marafa         | 508  | 1 |   |   |   | 1 |   |
| Tibiri         | Angoual Mayaki Fodi    | 786  | 1 |   |   |   | 1 |   |
| Tibiri         | Angoual Mazouga        | 468  | 1 |   |   |   | 1 |   |
| Tibiri         | Bangarassa             | 2487 | 1 |   | 1 |   |   |   |
| Tibiri         | Bankoula               | 1730 | 1 |   | 1 | 1 |   | 2 |
| Tibiri         | Bechemi                | 1361 | 1 | 1 | 1 |   | 1 | 2 |
| Tibiri         | Bechimi (Becheme)      | 1361 | 1 |   |   |   | 1 |   |
| Tibiri         | Binguel                | 861  | 1 |   |   |   | 1 |   |
| Tibiri         | Binguereta             | 707  | 1 |   |   |   | 1 |   |
| Tibiri         | Bourgoumawa            | 532  | 1 |   |   |   | 1 |   |
| Tibiri         | Chakafaché             | 469  | 1 |   |   |   | 1 |   |
| Tibiri         | Dan Binji              | 435  | 1 |   |   |   | 1 |   |
| Tibiri         | Djiwaye                | 1    |   |   |   | 1 |   |   |
| Tibiri         | Dogon Gao (Dan Gao)    | 334  | 1 |   | 1 |   | 1 | 2 |
| Tibiri         | Fallawa Haoussa        | 634  | 1 |   |   |   | 1 |   |
| Tibiri         | Garin Malam Abdou      | 87   | 1 |   |   | 1 |   |   |
| Tibiri         | Gobro (Goboro)         | 898  | 1 |   | 1 |   | 1 | 2 |
| Tibiri         | Gueraptchi Peul        | 128  | 1 |   |   |   | 1 |   |
| Tibiri         | Hamdallahi (Hamdalaye) | 353  | 1 |   |   |   | 1 |   |
| Tibiri         | Illéla                 | 562  | 1 |   |   |   | 1 |   |
| Tibiri         | Jikata                 | 341  | 1 |   |   |   | 1 |   |
| Tibiri         | Jikata Toudou          | 608  | 1 |   |   |   | 1 |   |
| Tibiri         | Kadidi                 | 1734 | 1 |   |   |   | 1 |   |
| Tibiri         | Kalgo                  | 457  | 1 |   |   |   | 1 |   |
| Tibiri         | Kallawa Lahillawa      | 595  | 1 |   | 1 | 1 | 1 | 4 |
| Tibiri         | Kolla Faria            | 141  | 1 |   |   |   | 1 |   |
| Tibiri         | Kolla Gobirawa         | 735  | 1 |   |   |   | 1 |   |
| Tibiri         | Kolla Mallam           | 139  | 1 |   |   |   | 1 |   |
| Tibiri         | Kolla Zingui           | 528  | 1 |   |   |   | 1 |   |
| Tibiri         | Kore Bechemi           | 402  | 1 |   | 1 |   |   |   |
| Tibiri         | Kouka                  | 648  | 1 |   | 1 |   | 1 |   |
| Tibiri         | Kouka                  | 648  | 1 |   | 1 | 1 | 1 | 4 |
| Tibiri         | Koundou Koundou        | 276  | 1 |   | 1 |   | 1 | 3 |
| Tibiri         | Made                   | 2142 | 1 |   | 1 |   |   |   |
| Tibiri         | Madobia                | 113  | 1 |   | 1 |   | 1 | 3 |
| Tibiri         | Madotchi Gueraptchi    | 1194 | 1 |   | 1 |   |   |   |
| Tibiri         | Mage (M. Dan Izori)    | 299  | 1 |   |   |   | 1 |   |
| Tibiri         | Makera                 | 634  | 1 |   |   |   | 1 |   |
| Tibiri         | Mallamawa              | 202  | 1 |   |   | 1 |   |   |
| Tibiri         | Nassarawa              | 2597 | 1 |   | 1 |   | 1 |   |
| Tibiri         | Nassarawa              | 2597 | 1 |   |   | 1 |   |   |
| Tibiri         | Sakari                 | 618  | 1 |   |   |   | 1 |   |
| Tibiri         | Salkam                 | 1620 | 1 |   |   |   | 1 |   |
| Tibiri         | Sarmakoye              | 656  | 1 |   | 1 |   |   |   |
| Tibiri         | Taramna                | 707  | 1 |   |   |   | 1 |   |
| Tibiri         | Tibiri                 | 6430 | 1 |   | 1 |   | 1 |   |
| Tibiri         | Tibiri                 | 6430 | 1 |   | 1 |   |   |   |
| Tibiri         | Tombo Boya             | 1712 | 1 |   |   |   | 1 |   |
| Tibiri         | Tombo Chiffa           | 579  | 1 | 1 |   |   | 1 |   |
| Tibiri         | Tombo Tchiffa          | 579  | 1 |   |   |   | 1 |   |
| Tibiri         | Tombon Bouya           | 1712 | 1 |   |   |   | 1 |   |
| Tibiri         | Toudoun Mori           | 615  | 1 |   |   | 1 |   |   |
| Tibiri         | Tounga Ibrahim         | 1422 | 1 |   |   | 1 | 1 | 2 |
| Tibiri         | Tounga Maibaza         | 196  | 1 |   | 1 |   |   |   |
| Tibiri         | Tounga Son Allah       | 491  | 1 |   |   | 1 | 1 | 3 |
| Tibiri         | Yarourou               | 985  | 1 |   |   |   | 1 |   |
| Tombo Koirey I | Alfa Koira             | 1169 | 1 |   |   |   | 1 |   |

|                |                                   |      |   |   |   |   |   |
|----------------|-----------------------------------|------|---|---|---|---|---|
| Tombo Koirey I | Almou Koara                       | 499  | 1 | 1 | 1 | 1 | 3 |
| Tombo Koirey I | Bangou Fada Rouzou                | 1137 | 1 |   | 1 | 1 | 2 |
| Tombo Koirey I | Bangou Fada Siddo                 | 1483 | 1 |   | 1 | 1 | 2 |
| Tombo Koirey I | Banidey                           | 974  | 1 |   |   | 1 | 2 |
| Tombo Koirey I | Bawabéri (Baouabéri)              | 1336 | 1 |   |   | 1 | 2 |
| Tombo Koirey I | Bawadey                           | 897  | 1 |   |   | 1 | 3 |
| Tombo Koirey I | Bongou Fada Rouzou                | 1137 | 1 | 1 | 1 |   | 2 |
| Tombo Koirey I | Boroyzédey                        | 1108 | 1 |   |   | 1 |   |
| Tombo Koirey I | Bossey                            | 222  | 1 | 1 |   | 1 | 4 |
| Tombo Koirey I | Ct Tourou Tourou (TT Peulh)       | 49   | 1 | 1 |   | 1 | 2 |
| Tombo Koirey I | Elhadji Dey                       | 784  | 1 | 1 | 1 | 1 | 4 |
| Tombo Koirey I | Fandoubon Tombo                   | 1166 | 1 | 1 | 1 | 1 | 4 |
| Tombo Koirey I | Gaya-Dey                          | 437  | 1 | 1 | 1 |   | 2 |
| Tombo Koirey I | Goubey Dey                        | 342  | 1 |   |   |   | 1 |
| Tombo Koirey I | Halidou Koara                     | 385  | 1 | 1 |   | 1 | 4 |
| Tombo Koirey I | Marafadey                         | 1108 | 1 |   |   | 1 |   |
| Tombo Koirey I | Mirrizam                          | 862  | 1 | 1 | 1 | 1 | 3 |
| Tombo Koirey I | Moribane                          | 306  | 1 |   |   |   | 1 |
| Tombo Koirey I | Sakari Koira                      | 939  | 1 | 1 |   | 1 | 2 |
| Tombo Koirey I | Soja Dey Bossey                   | 288  | 1 |   |   |   | 1 |
| Tombo Koirey I | Tallé Guindé                      | 572  | 1 |   |   | 1 | 2 |
| Tombo Koirey I | Tombo Koirey Souley               |      | 1 |   |   | 1 |   |
| Tombo Koirey I | Tombo koirey Yérima               | 2600 | 1 |   |   |   | 1 |
| Tombo Koirey I | Tombo Kouarey Yerima (Tomboireyi) | 3792 | 1 |   |   | 1 |   |
| Tombo Koirey I | Tourou Tourou Koara               | 860  | 1 | 1 |   | 1 | 2 |
| Tombo Koirey I | Wadouka                           | 17   | 1 |   | 1 |   |   |
| Tombo Koirey I | Wanga Kaina                       | 912  | 1 | 1 |   | 1 | 3 |
| Tombo Koirey I | Youlwa                            | 360  | 1 |   |   | 1 |   |
| Tombo Koirey I | Zango Koara                       | 987  | 1 |   |   | 1 | 2 |
| Tounouga       | Banizoumbou Madargueyo            | 486  | 1 |   |   | 1 |   |
| Tounouga       | Boune Boune                       | 419  | 1 | 1 |   | 1 |   |
| Tounouga       | Boune-Boune                       | 419  | 1 |   |   | 1 |   |
| Tounouga       | Dole                              | 3325 | 1 |   |   | 1 | 2 |
| Tounouga       | Gatawani Beri                     | 2159 | 1 | 1 |   | 1 |   |
| Tounouga       | Gatawani Beri                     | 2159 | 1 |   |   | 1 |   |
| Tounouga       | Gatawani Kaina                    | 2871 | 1 | 1 |   | 1 |   |
| Tounouga       | Gatawani Kaina (Tounga CH)        | 2871 | 1 |   |   | 1 |   |
| Tounouga       | Gondrou (Gondarou)                | 1696 | 1 |   |   | 1 |   |
| Tounouga       | Goron Kondo                       | 939  | 1 |   |   | 1 | 2 |
| Tounouga       | Guehedi                           | 428  | 1 |   |   | 1 |   |
| Tounouga       | Idi Koira                         | 295  | 1 |   |   | 1 |   |
| Tounouga       | Koma                              | 594  | 1 | 1 |   | 1 | 2 |
| Tounouga       | Koma                              | 594  | 1 |   |   | 1 |   |
| Tounouga       | Kouriva                           | 1    |   |   |   |   | 1 |
| Tounouga       | Rountawa                          | 1    |   |   |   |   | 1 |
| Tounouga       | Rountoua Gattawani                | 383  | 1 |   |   | 1 |   |
| Tounouga       | Rountoua Lagaré                   | 1    |   |   |   | 1 |   |
| Tounouga       | Rountouan Gatawani                | 383  | 1 |   |   | 1 |   |
| Tounouga       | Sabon Bimi                        | 5970 | 1 | 1 |   | 1 |   |
| Tounouga       | Sabon Bimi                        | 5970 | 1 |   |   | 1 |   |
| Tounouga       | Tahirou Tounga                    | 515  | 1 |   |   |   | 1 |
| Tounouga       | Tounga (Tounoua)                  | 8296 | 1 |   |   | 1 | 2 |
| Tounouga       | Tounga Dan Moussa                 | 1    |   |   |   | 1 |   |
| Tounouga       | Tounga Djado                      | 296  | 1 |   |   | 1 | 2 |
| Tounouga       | Tounga Mayara                     | 873  | 1 |   |   | 1 |   |
| Tounouga       | Tounga Zanoua                     | 1    | 1 |   |   |   | 1 |
| Tounouga       | Tounga Zanoua                     | 163  | 1 |   |   | 1 |   |
| Tounouga       | Toungan Zanoua (Tounga Zanoua)    | 163  | 1 |   |   | 1 |   |
| Tounouga       | Tounouga                          | 8296 | 1 |   |   | 1 |   |
| Yelou          | Adiga Lele                        | 1582 | 1 |   |   | 1 |   |
| Yelou          | Agemouraba (Adje                  | 230  | 1 |   |   | 1 |   |

Abbreviations: Ct Campement, D Drought, P Population, PF Pluvial flood, QT Quartier (neighborhood), RF River flood
