# Supplementary material
Source: MDPI journal article supplement (https://www.mdpi.com/2225-1154/6/3/67)

**Supplementary Materials:**

**Multihazard Risk Assessment for Planning with Climate in the Dosso Region, Niger**

Maurizio Tiepolo, Maurizio Bacci, Sarah Braccio

**Equations S1.**


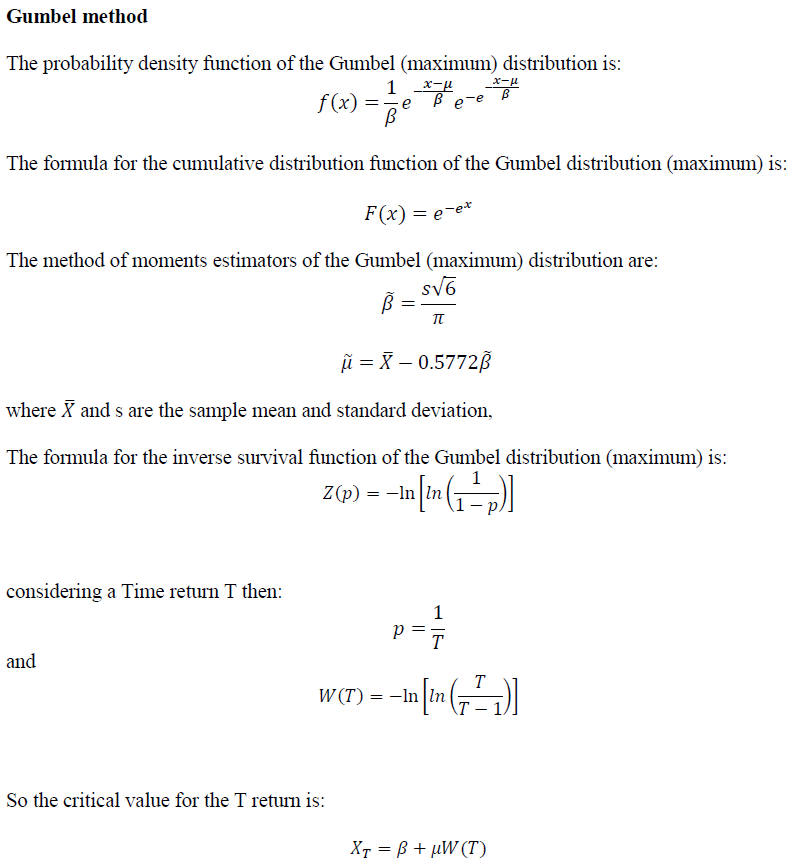

Supplement: s1 [file s1 › Tiepolo & al-Supplementary material Equations 1S-edited.docx]
