# Supplementary material
Source: MDPI journal article supplement (https://www.mdpi.com/2225-1154/6/3/67)
Supplement: s1 [file s1 › Tiepolo & al-Supplementary material Equations 1S-english-changes.pdf]

## Supplementary Materials:

### Multi-hazard Risk Assessment for Planning with Climate in the Dosso Region, Niger

Maurizio Tiepolo, Maurizio Bacci, Sarah Braccio

Equations S1.

#### Gumbel method

The probability density function of the Gumbel (maximum) distribution is:

$$f(x) = \frac{1}{\beta} e^{-\frac{x-\mu}{\beta}} e^{-e^{-\frac{x-\mu}{\beta}}}$$

The formula for the cumulative distribution function of the Gumbel distribution (maximum) is:

$$F(x) = e^{-e^{-x}}$$

The method of moments estimators of the Gumbel (maximum) distribution are:

$$\tilde{\beta} = \frac{s\sqrt{6}}{\pi}$$

$$\tilde{\mu} = \bar{X} - 0.5772\tilde{\beta}$$

where  $\bar{X}$  and  $s$  are the sample mean and standard deviation,

The formula for the inverse survival function of the Gumbel distribution (maximum) is:

$$Z(p) = -\ln \left[ \ln \left( \frac{1}{1-p} \right) \right]$$

considering a Time return  $T$  then:

$$p = \frac{1}{T}$$

and

$$W(T) = -\ln \left[ \ln \left( \frac{T}{T-1} \right) \right]$$

So the critical value for the  $T$  return is:

$$X_T = \beta + \mu W(T)$$
