# Supplementary material
Source: MDPI journal article supplement (https://www.mdpi.com/2225-1154/6/3/67)
Supplement: s1 [file s1 › Tiepolo & al-Supplementary material Table 1S-english-changes.pdf]

## Supplementary Materials:

## Multi-hazard Risk Assessment for Planning with Climate in the Dosso Region, Niger

Maurizio Tiepolo, Maurizio Bacci, Sarah Braccio

Table S2. SPI 1981-2017 for the municipalities of the Dosso Region (6= June, 7 = July, 8 = August; 9 = September)

| Municipality   | 1981  |       |       |       | 1982  |       |       |       | 1983  |       |       |       | 1984  |       |       |       | 1985  |       |       |       |
|----------------|-------|-------|-------|-------|-------|-------|-------|-------|-------|-------|-------|-------|-------|-------|-------|-------|-------|-------|-------|-------|
|                | 6     | 7     | 8     | 9     | 6     | 7     | 8     | 9     | 6     | 7     | 8     | 9     | 6     | 7     | 8     | 9     | 6     | 7     | 8     | 9     |
| Bana           | 0.38  | 0.88  | -0.87 | -0.14 | -0.21 | -1.53 | -0.23 | -0.38 | 0.96  | -1.08 | -2.03 | 1.07  | -1.92 | -1.96 | -2.22 | -0.12 | -0.32 | -0.81 | 0.70  | 0.10  |
| Bengou         | 0.89  | 1.04  | -1.03 | -0.09 | -0.19 | -1.52 | -0.46 | -0.53 | 0.63  | -1.20 | -1.74 | 1.26  | -1.92 | -1.81 | -1.94 | 0.31  | -0.53 | -0.61 | 0.47  | -0.04 |
| Birni Ngaoure  | -0.67 | 0.85  | -0.89 | -0.11 | 0.04  | -1.89 | 0.78  | -1.41 | 0.61  | 0.13  | -1.88 | 0.20  | -0.46 | -2.07 | -1.95 | 0.36  | -0.36 | -0.76 | 0.45  | -0.08 |
| Dan Kassari    | 0.09  | 0.82  | -0.20 | 0.14  | -0.23 | -0.39 | 0.76  | -1.70 | -0.77 | -0.47 | -0.97 | 0.61  | -0.89 | -1.95 | -2.55 | 0.91  | 0.14  | -1.45 | 0.60  | 0.26  |
| Dioundiou      | -0.43 | 1.49  | -0.76 | 0.15  | 0.36  | -1.56 | 0.16  | -1.45 | 0.28  | -0.99 | -1.47 | 0.33  | -1.25 | -1.91 | -2.62 | 0.15  | -0.51 | -1.15 | 0.95  | 0.15  |
| Dogon Kirya    | -0.02 | 0.84  | -0.24 | -0.17 | 0.19  | -0.48 | 0.42  | -1.90 | -1.03 | 0.59  | -1.25 | 0.26  | -0.92 | -1.82 | -2.57 | 1.16  | 0.22  | -1.54 | -0.09 | -0.06 |
| Dogondoutchi   | 0.79  | 0.59  | -0.17 | -0.05 | 0.07  | -1.11 | 0.75  | -1.69 | -0.26 | 0.18  | -0.94 | 0.40  | -0.65 | -2.37 | -2.53 | 0.23  | -0.74 | 0.07  | -0.43 | 0.01  |
| Dosso          | -0.07 | 0.49  | -0.60 | -0.03 | 0.07  | -1.82 | 0.03  | -1.44 | 0.66  | 0.38  | -1.67 | 0.14  | -0.37 | -2.22 | -2.03 | 0.32  | -0.81 | -0.93 | 0.52  | -0.15 |
| Doumaga        | -0.09 | 1.36  | -0.63 | 0.07  | 0.33  | -1.13 | 0.78  | -1.61 | -0.18 | -0.96 | -1.70 | 0.06  | -0.69 | -2.43 | -2.65 | -0.09 | -0.77 | -1.00 | 0.69  | -0.31 |
| Fabidji        | -0.91 | 0.28  | -0.80 | -0.26 | 0.80  | -1.98 | -0.21 | -1.39 | -0.08 | -0.27 | -2.00 | 0.23  | 0.41  | -2.05 | -1.85 | 0.45  | 0.05  | -1.09 | 0.74  | -0.04 |
| Fakara         | -0.92 | 1.26  | -1.11 | -0.38 | -0.22 | -2.05 | -0.38 | -1.09 | 1.50  | 0.31  | -1.92 | 0.85  | -1.11 | -2.05 | -1.69 | -0.37 | -0.50 | -0.93 | 0.19  | 0.01  |
| Falmey         | -0.95 | -0.06 | -0.56 | -0.34 | 0.94  | -1.66 | -0.15 | -1.14 | 0.08  | -0.56 | -1.75 | 0.39  | -0.09 | -1.84 | -2.12 | 0.57  | -0.35 | -0.84 | 0.26  | 0.17  |
| Falwel         | 1.14  | 0.31  | -0.06 | -0.28 | -0.17 | -1.39 | 0.96  | -1.52 | 0.47  | 0.56  | -1.12 | 0.39  | -1.38 | -1.76 | -2.64 | 0.28  | -0.75 | -0.75 | -0.04 | -0.10 |
| Farrey         | -0.52 | 1.02  | -0.76 | 0.09  | 0.27  | -1.59 | 0.17  | -1.37 | 0.19  | -1.12 | -1.58 | 0.13  | -0.73 | -1.87 | -2.33 | 0.54  | -0.51 | -0.68 | 0.79  | 0.14  |
| Garankedey     | 0.11  | 0.43  | -0.40 | -0.04 | -0.32 | -1.65 | -0.14 | -1.31 | 1.09  | 0.98  | -1.06 | 0.30  | -0.94 | -1.97 | -2.09 | 0.09  | -0.55 | -0.83 | 0.40  | -0.24 |
| Gaya           | 0.21  | 0.56  | -1.02 | -0.06 | -0.66 | -1.50 | -0.55 | -0.66 | 0.20  | -0.49 | -1.80 | 0.80  | -1.68 | -1.79 | -1.96 | 0.39  | -0.31 | -0.03 | 0.74  | -0.07 |
| Golle          | -0.48 | 0.53  | -0.73 | -0.04 | 0.18  | -1.57 | -0.16 | -1.42 | 0.09  | -0.22 | -1.81 | -0.04 | -0.16 | -2.06 | -2.02 | 0.14  | -0.39 | -0.94 | 0.48  | -0.18 |
| Gorou Bakassam | 0.29  | 0.81  | -0.45 | 0.02  | 0.18  | -1.47 | -0.01 | -1.64 | 0.58  | 0.13  | -1.37 | 0.33  | -0.38 | -2.35 | -2.30 | 0.10  | -0.51 | -1.09 | 1.07  | -0.15 |
| Guechemé       | -0.09 | 1.36  | -0.63 | 0.07  | 0.33  | -1.13 | 0.78  | -1.61 | -0.18 | -0.96 | -1.70 | 0.06  | -0.69 | -2.43 | -2.65 | -0.09 | -0.77 | -1.00 | 0.69  | -0.31 |
| Guilladjé      | -0.95 | -0.06 | -0.56 | -0.34 | 0.94  | -1.66 | -0.15 | -1.14 | 0.08  | -0.56 | -1.75 | 0.39  | -0.09 | -1.84 | -2.12 | 0.57  | -0.35 | -0.84 | 0.26  | 0.17  |
| Harikanassou   | -0.40 | 0.95  | -0.64 | 0.02  | -0.13 | -1.76 | 0.32  | -1.33 | 1.17  | 0.68  | -1.37 | 0.46  | -1.07 | -1.82 | -1.96 | -0.12 | -0.55 | -1.14 | 0.18  | -0.21 |
| Kankandi       | -0.91 | 0.28  | -0.80 | -0.26 | 0.80  | -1.98 | -0.21 | -1.39 | -0.08 | -0.27 | -2.00 | 0.23  | 0.41  | -2.05 | -1.85 | 0.45  | 0.05  | -1.09 | 0.74  | -0.04 |
| Kara Kara      | -0.13 | 1.39  | -0.62 | 0.20  | 0.36  | -1.16 | 0.40  | -1.74 | 0.00  | -0.52 | -1.59 | 0.21  | -0.60 | -2.23 | -2.52 | -0.18 | -0.42 | -1.06 | 0.79  | 0.09  |
| Kargui Bangou  | -0.13 | 1.39  | -0.62 | 0.20  | 0.36  | -1.16 | 0.40  | -1.74 | 0.00  | -0.52 | -1.59 | 0.21  | -0.60 | -2.23 | -2.52 | -0.18 | -0.42 | -1.06 | 0.79  | 0.09  |
| Kieché         | 0.18  | 1.18  | -0.41 | -0.06 | -0.11 | -1.14 | 0.43  | -1.82 | -0.58 | 0.24  | -1.12 | 0.01  | -0.36 | -2.57 | -2.34 | 0.36  | -0.72 | -0.78 | 0.02  | 0.27  |
| Kiota          | -0.40 | 0.95  | -0.64 | 0.02  | -0.13 | -1.76 | 0.32  | -1.33 | 1.17  | 0.68  | -1.37 | 0.46  | -1.07 | -1.82 | -1.96 | -0.12 | -0.55 | -1.14 | 0.18  | -0.21 |
| Kore Mairoua   | 0.28  | 0.93  | -0.43 | 0.01  | -0.03 | -1.06 | 0.51  | -1.78 | -0.29 | 0.51  | -1.34 | 0.24  | -0.18 | -2.60 | -2.45 | 0.54  | -0.87 | -0.68 | -0.10 | 0.29  |
| Koygolo        | 0.14  | 0.85  | -0.40 | 0.50  | -0.39 | -1.44 | -0.02 | -1.49 | 1.18  | 0.29  | -0.65 | 0.49  | -1.38 | -1.78 | -2.01 | -0.22 | -0.34 | -0.68 | -0.42 | -0.59 |
| Loga           | 1.14  | 0.47  | -0.21 | -0.04 | -0.66 | -1.32 | 0.25  | -1.61 | 0.68  | 1.03  | -1.05 | 0.32  | -1.43 | -1.64 | -2.38 | -0.14 | -0.72 | -0.89 | 0.03  | 0.14  |
| Matankari      | 0.27  | 0.70  | -0.24 | 0.03  | 0.09  | -0.84 | 0.75  | -1.73 | -0.92 | 0.07  | -1.35 | 0.26  | -0.34 | -1.88 | -2.52 | 0.88  | 0.16  | -1.52 | 0.17  | 0.08  |
| Mokko          | 0.58  | 0.47  | -0.30 | -0.06 | -0.26 | -1.17 | 0.06  | -1.46 | 1.14  | 0.59  | -1.19 | 0.52  | -0.73 | -2.11 | -2.29 | 0.06  | -0.60 | -0.80 | 0.64  | -0.15 |
| Ngonga         | -0.67 | 0.85  | -0.89 | -0.11 | 0.04  | -1.89 | 0.78  | -1.41 | 0.61  | 0.13  | -1.88 | 0.20  | -0.46 | -2.07 | -1.95 | 0.36  | -0.36 | -0.76 | 0.45  | -0.08 |
| Sambera        | -0.64 | -0.09 | -0.56 | -0.17 | 0.00  | -1.53 | 0.08  | -0.76 | 0.89  | -0.71 | -1.93 | 0.23  | -1.00 | -1.94 | -2.38 | 0.62  | -0.53 | -0.04 | 0.31  | 0.25  |
| Sokorbe        | 0.11  | 0.43  | -0.40 | -0.04 | -0.32 | -1.65 | -0.14 | -1.31 | 1.09  | 0.98  | -1.06 | 0.30  | -0.94 | -1.97 | -2.09 | 0.09  | -0.55 | -0.83 | 0.40  | -0.24 |
| Soucoucoutane  | 0.24  | 0.61  | -0.08 | -0.08 | 0.39  | -1.04 | -0.19 | -1.81 | -0.87 | 0.34  | -1.31 | -0.05 | -1.45 | -1.85 | -2.73 | 1.04  | -0.13 | -0.77 | -0.67 | -0.10 |
| Tanda          | -0.19 | 0.38  | -0.79 | -0.20 | -0.23 | -1.48 | -0.16 | -0.55 | 0.64  | -1.04 | -1.87 | 0.61  | -1.42 | -1.94 | -2.15 | 0.21  | -0.38 | -0.36 | 0.59  | -0.07 |
| Tessa          | -0.23 | 1.03  | -0.73 | 0.20  | 0.35  | -1.34 | 0.20  | -1.62 | 0.22  | -0.39 | -1.56 | 0.38  | -0.33 | -2.19 | -2.17 | 0.10  | -0.59 | -1.20 | 0.96  | -0.10 |
| Tibiri         | 0.02  | 1.22  | -0.50 | 0.01  | 0.14  | -1.03 | 0.67  | -1.80 | -0.21 | -0.19 | -1.46 | 0.13  | -0.25 | -2.83 | -2.53 | -0.05 | -0.91 | -0.85 | 0.35  | 0.04  |
| Tombokoarey 1  | 0.56  | 0.69  | -0.38 | -0.07 | 0.17  | -1.16 | 0.33  | -1.61 | 0.36  | 0.47  | -1.40 | 0.52  | -0.45 | -2.19 | -2.50 | 0.41  | -0.74 | -0.67 | 0.29  | -0.02 |
| Tombokoarey2   | 0.56  | 0.69  | -0.38 | -0.07 | 0.17  | -1.16 | 0.33  | -1.61 | 0.36  | 0.47  | -1.40 | 0.52  | -0.45 | -2.19 | -2.50 | 0.41  | -0.74 | -0.67 | 0.29  | -0.02 |
| Tounouga       | 0.89  | 1.04  | -1.03 | -0.09 | -0.19 | -1.52 | -0.46 | -0.53 | 0.63  | -1.20 | -1.74 | 1.26  | -1.92 | -1.81 | -1.94 | 0.31  | -0.53 | -0.61 | 0.47  | -0.04 |
| Yelou          | -0.19 | 0.38  | -0.79 | -0.20 | -0.23 | -1.48 | -0.16 | -0.55 | 0.64  | -1.04 | -1.87 | 0.61  | -1.42 | -1.94 | -2.15 | 0.21  | -0.38 | -0.36 | 0.59  | -0.07 |
| Zabori         | -0.43 | 1.49  | -0.76 | 0.15  | 0.36  | -1.56 | 0.16  | -1.45 | 0.28  | -0.99 | -1.47 | 0.33  | -1.25 | -1.91 | -2.62 | 0.15  | -0.51 | -1.15 | 0.95  | 0.15  |

| Municipality   | 1986  |       |       |      | 1987  |       |       |       | 1988  |       |      |      | 1989  |       |       |      | 1990  |      |       |       |
|----------------|-------|-------|-------|------|-------|-------|-------|-------|-------|-------|------|------|-------|-------|-------|------|-------|------|-------|-------|
|                | 6     | 7     | 8     | 9    | 6     | 7     | 8     | 9     | 6     | 7     | 8    | 9    | 6     | 7     | 8     | 9    | 6     | 7    | 8     | 9     |
| Bana           | -0.72 | 1.01  | -0.71 | 1.74 | -1.73 | 0.48  | -0.71 | -1.76 | 1.75  | -0.71 | 1.02 | 0.35 | 0.98  | -0.61 | -0.53 | 0.94 | -1.72 | 1.74 | -1.73 | -0.72 |
| Bengou         | -0.72 | 1.08  | -0.81 | 1.72 | -1.72 | 0.04  | -0.80 | -1.72 | 2.28  | -0.23 | 1.05 | 0.11 | 1.75  | -0.52 | -0.33 | 0.81 | -0.95 | 1.73 | -0.89 | -0.72 |
| Birni Ngareure | -1.76 | -0.76 | -0.06 | 1.76 | -1.78 | 0.20  | -0.16 | -1.72 | 1.96  | 0.38  | 1.09 | 1.73 | -0.88 | -0.83 | 0.84  | 1.77 | -1.74 | 0.89 | -1.79 | 0.72  |
| Dan Kassari    | -0.70 | 1.76  | 0.29  | 1.74 | -1.77 | -1.71 | -0.25 | -0.57 | -0.33 | 1.73  | 0.68 | 0.35 | -0.11 | -0.84 | 0.39  | 0.58 | -0.58 | 2.18 | -1.75 | -0.77 |
| Dioundiou      | -0.78 | 0.73  | -0.87 | 1.72 | -0.74 | 0.74  | -0.82 | -1.73 | 0.79  | -0.53 | 0.76 | 0.32 | 0.86  | -0.71 | -0.01 | 0.68 | -1.73 | 1.79 | -1.76 | -0.72 |
| Dogon Kirya    | -0.73 | 1.77  | 0.45  | 1.72 | -0.79 | -1.72 | -0.09 | -0.29 | -0.21 | 0.98  | 0.58 | 0.43 | -0.57 | -1.71 | 0.93  | 0.70 | -0.94 | 1.74 | -1.71 | -0.09 |
| Dogondoutchi   | -0.79 | -0.10 | 0.50  | 1.75 | -1.79 | -1.77 | -0.32 | -1.78 | 0.39  | 0.54  | 0.84 | 0.29 | -0.20 | -0.91 | -0.15 | 0.38 | -0.92 | 2.21 | -2.07 | -0.59 |
| Dosso          | -1.74 | -0.32 | -0.47 | 1.71 | -0.78 | -0.19 | -0.21 | -1.74 | 2.05  | 0.33  | 0.83 | 0.94 | -0.53 | -0.46 | 0.46  | 1.77 | -1.74 | 1.74 | -1.70 | 0.89  |
| Doumaga        | -0.72 | 0.74  | -0.77 | 1.73 | -1.79 | 0.19  | -0.76 | -0.85 | 0.47  | -1.70 | 0.88 | 1.73 | 0.76  | -0.06 | 0.25  | 0.70 | -0.86 | 2.06 | -1.78 | -0.72 |
| Fabidji        | -0.90 | 0.32  | -0.73 | 1.76 | -1.72 | -0.10 | -0.27 | -1.74 | 1.76  | 0.72  | 0.77 | 1.77 | -0.07 | -0.95 | 0.30  | 1.72 | -1.72 | 1.73 | -1.76 | 0.72  |
| Fakara         | -1.76 | -0.75 | -0.13 | 1.75 | -1.72 | 0.38  | -0.01 | -1.72 | 2.23  | 0.59  | 0.92 | 1.71 | -1.73 | -0.76 | 0.82  | 1.74 | -0.82 | 0.66 | -1.74 | 0.52  |
| Falmey         | -0.76 | 0.75  | -0.12 | 1.76 | -1.79 | -0.41 | 0.06  | -1.77 | 2.04  | 0.47  | 0.59 | 1.66 | 0.39  | -0.99 | -0.04 | 0.85 | -0.59 | 1.79 | -1.74 | 1.26  |
| Falwel         | -1.72 | 0.23  | 0.60  | 1.74 | -1.73 | -0.89 | -0.08 | -0.90 | 0.31  | 0.44  | 0.81 | 0.54 | -0.28 | -1.71 | 0.00  | 0.47 | -1.76 | 2.04 | -2.02 | -0.80 |
| Farrey         | -1.71 | 0.87  | -1.72 | 0.94 | -0.35 | 0.09  | -0.79 | -1.73 | 1.71  | -0.34 | 0.60 | 0.53 | 0.76  | -0.74 | 0.01  | 1.05 | -1.72 | 1.72 | -1.74 | -0.03 |
| Garankedey     | -1.78 | -0.51 | -0.24 | 1.74 | -0.43 | -0.35 | -0.45 | -1.74 | 1.80  | 0.37  | 0.93 | 1.76 | -0.83 | -1.71 | 0.28  | 0.83 | -1.76 | 0.96 | -1.77 | -0.06 |
| Gaya           | -0.90 | 0.96  | -0.54 | 0.97 | -1.72 | 0.22  | -0.51 | -1.78 | 2.23  | -0.02 | 1.32 | 0.07 | 0.90  | -0.69 | -0.09 | 0.90 | -0.95 | 0.67 | -1.75 | -0.31 |
| Golle          | -0.71 | 0.73  | -0.34 | 1.79 | -0.81 | -0.27 | -0.46 | -1.73 | 1.76  | 0.27  | 0.81 | 1.72 | 0.20  | -1.73 | 0.71  | 1.73 | -1.79 | 1.79 | -1.72 | 0.72  |
| Gorou Bakassam | -1.73 | -0.73 | -0.55 | 1.76 | -0.77 | 0.00  | -0.30 | -1.74 | 1.74  | 0.07  | 0.78 | 0.37 | 0.22  | -0.81 | 0.71  | 1.73 | -1.75 | 1.84 | -1.77 | 0.44  |
| Guechemé       | -0.72 | 0.74  | -0.37 | 1.73 | -1.79 | 0.19  | -0.76 | -0.85 | 0.47  | -1.70 | 0.88 | 1.73 | 0.76  | -0.06 | 0.25  | 0.70 | -0.86 | 2.06 | -1.78 | -0.51 |
| Guilladje      | -0.76 | 0.75  | -0.12 | 1.76 | -1.79 | -0.41 | 0.06  | -1.77 | 2.04  | 0.47  | 0.59 | 1.66 | 0.39  | -0.99 | -0.04 | 0.85 | -0.59 | 1.79 | -1.74 | 1.26  |
| Harikanassou   | -1.76 | -0.65 | -0.35 | 1.73 | -1.74 | -0.27 | -0.33 | -1.73 | 1.81  | 0.60  | 0.89 | 0.96 | -1.75 | -0.84 | 0.63  | 0.89 | -0.93 | 0.72 | -1.78 | -0.72 |
| Kankandi       | -0.90 | 0.32  | -0.73 | 1.76 | -1.72 | -0.10 | -0.27 | -1.74 | 1.76  | 0.72  | 0.77 | 1.77 | -0.07 | -0.95 | 0.30  | 1.72 | -1.72 | 1.73 | -1.76 | 0.72  |
| Kara Kara      | -0.72 | 0.22  | -0.83 | 1.74 | -1.70 | 0.73  | -0.63 | -1.73 | 0.68  | -0.56 | 0.65 | 0.62 | 0.52  | -0.57 | 0.71  | 0.57 | -1.72 | 1.75 | -1.72 | 0.72  |
| Kargui Bangou  | -0.72 | 0.22  | -0.83 | 1.74 | -1.70 | 0.73  | -0.63 | -1.73 | 0.68  | -0.56 | 0.65 | 0.62 | 0.52  | -0.57 | 0.71  | 0.57 | -1.72 | 1.75 | -1.72 | 0.72  |
| Kieché         | -0.73 | -0.15 | -0.02 | 0.92 | -1.70 | -0.40 | -0.52 | -0.85 | 0.71  | 0.41  | 0.90 | 0.74 | 0.71  | -1.71 | -0.25 | 0.71 | -0.84 | 2.70 | -2.51 | -0.20 |
| Kiota          | -1.76 | -0.65 | -0.35 | 1.73 | -1.74 | -0.27 | -0.33 | -1.73 | 1.81  | 0.60  | 0.89 | 0.96 | -1.75 | -0.84 | 0.63  | 0.89 | -0.93 | 0.72 | -1.78 | -0.72 |
| Kore Mairoua   | -0.94 | -0.64 | -0.27 | 0.92 | -1.71 | -0.19 | -0.43 | -1.75 | 0.30  | -0.20 | 0.83 | 0.53 | -0.02 | -1.72 | -0.32 | 0.71 | -1.73 | 2.26 | -2.34 | -0.45 |
| Koygolo        | -1.78 | -0.54 | -0.41 | 1.74 | -0.94 | -1.75 | -0.28 | -1.71 | 1.78  | 0.58  | 0.41 | 0.68 | -1.71 | -0.98 | 0.65  | 0.82 | 0.71  | 0.26 | -1.74 | 0.02  |
| Loga           | -1.72 | -0.16 | 0.33  | 1.74 | -0.68 | -0.80 | -0.16 | -1.70 | 0.75  | 0.75  | 1.70 | 0.61 | -0.60 | -1.75 | 0.71  | 0.62 | -0.75 | 1.77 | -1.74 | -0.58 |
| Matankari      | -0.71 | 1.70  | 0.56  | 1.73 | -1.71 | -1.73 | -0.14 | -0.71 | 0.71  | 1.71  | 0.58 | 0.56 | -0.76 | -1.78 | 0.78  | 0.60 | -0.82 | 1.76 | -1.74 | -0.31 |
| Mokko          | -1.76 | -0.03 | -0.14 | 1.74 | -0.50 | -0.17 | -0.05 | -1.77 | 1.75  | 0.42  | 0.91 | 0.74 | -0.44 | -1.70 | 0.21  | 1.79 | -1.74 | 1.75 | -1.77 | -0.01 |
| Ngonga         | -1.76 | -0.76 | -0.06 | 1.76 | -1.78 | 0.20  | -0.16 | -1.72 | 1.96  | 0.38  | 1.09 | 1.73 | -0.88 | -0.83 | 0.84  | 1.77 | -1.74 | 0.89 | -1.79 | 0.72  |
| Sambere        | -1.72 | 1.26  | -0.86 | 0.62 | -0.87 | 0.21  | -0.77 | -1.73 | 2.04  | -0.68 | 1.58 | 1.86 | 1.74  | -0.94 | 0.09  | 0.74 | -0.58 | 0.92 | -1.73 | -0.21 |
| Sokorbe        | -1.78 | -0.51 | -0.24 | 1.74 | -0.43 | -0.35 | -0.45 | -1.74 | 1.80  | 0.37  | 0.93 | 1.76 | -0.83 | -1.71 | 0.28  | 0.83 | -1.76 | 0.96 | -1.77 | -0.06 |
| Soucoucoutane  | -0.61 | 0.98  | 0.06  | 1.77 | -1.72 | -1.75 | -0.27 | -0.21 | 0.70  | 0.49  | 0.36 | 0.57 | -0.61 | -1.74 | 0.81  | 0.29 | -0.64 | 0.74 | -1.79 | -0.23 |
| Tanda          | -1.74 | 1.77  | -0.72 | 0.69 | -0.70 | 0.78  | -0.82 | -1.74 | 1.97  | -0.41 | 1.75 | 0.45 | 0.91  | -0.77 | -0.73 | 1.79 | -0.90 | 1.74 | -1.74 | -0.32 |
| Tessa          | -1.73 | -0.15 | -0.67 | 1.71 | -0.61 | 0.19  | -0.58 | -1.74 | 0.90  | -0.37 | 0.49 | 0.46 | 0.58  | -0.87 | -0.71 | 1.77 | -1.73 | 1.70 | -1.78 | 0.36  |
| Tibiri         | -0.94 | -0.28 | -0.53 | 1.76 | -1.75 | 0.29  | -0.68 | -0.99 | 0.47  | -0.85 | 0.62 | 0.80 | 0.34  | -0.58 | 0.22  | 0.21 | -1.74 | 1.89 | -2.30 | -0.27 |
| Tombokoarey 1  | -1.72 | -0.32 | -0.32 | 1.72 | -0.99 | 0.07  | -0.10 | -1.74 | 0.57  | -0.16 | 0.81 | 0.39 | 0.71  | -1.73 | -0.07 | 0.46 | -1.74 | 2.13 | -2.11 | -0.25 |
| Tombokoarey2   | -1.72 | -0.32 | -0.32 | 1.72 | -0.99 | 0.07  | -0.10 | -1.74 | 0.57  | -0.16 | 0.81 | 0.39 | 0.71  | -1.73 | -0.07 | 0.46 | -1.74 | 2.13 | -2.11 | -0.25 |
| Tounouga       | -0.61 | 1.78  | -0.81 | 1.71 | -1.72 | 0.04  | -0.80 | -1.71 | 2.28  | -0.23 | 1.05 | 0.11 | 1.75  | -0.52 | -0.33 | 0.81 | -0.95 | 1.73 | -0.89 | -0.72 |
| Yelou          | -1.74 | 1.77  | -0.72 | 0.69 | -0.70 | 0.78  | -0.82 | -1.74 | 1.97  | -0.41 | 1.75 | 0.45 | 0.91  | -0.77 | -0.73 | 1.79 | -0.90 | 1.74 | -1.74 | -0.32 |
| Zabori         | -0.78 | 0.73  | -0.87 | 1.72 | -0.74 | 0.74  | -0.82 | -1.73 | 0.79  | -0.53 | 0.76 | 0.32 | 0.86  | -0.71 | -0.01 | 0.68 | -1.73 | 1.79 | -1.76 | -0.72 |

| Municipality   | 1991 |       |       |       | 1992  |       |      |       | 1993  |       |       |       | 1994  |       |      |       | 1995  |       |       |       |
|----------------|------|-------|-------|-------|-------|-------|------|-------|-------|-------|-------|-------|-------|-------|------|-------|-------|-------|-------|-------|
|                | 6    | 7     | 8     | 9     | 6     | 7     | 8    | 9     | 6     | 7     | 8     | 9     | 6     | 7     | 8    | 9     | 6     | 7     | 8     | 9     |
| Bana           | 0.12 | -0.56 | -0.54 | -2.37 | -0.57 | 0.95  | 1.15 | -1.42 | -0.03 | -0.12 | 0.02  | -0.87 | 2.01  | -0.03 | 2.03 | 1.47  | -0.70 | -0.36 | 0.89  | -0.77 |
| Bengou         | 0.12 | -0.32 | -0.48 | -2.35 | -0.63 | 0.81  | 1.03 | -1.04 | 0.04  | -0.03 | -0.57 | -0.97 | 1.26  | -0.30 | 2.06 | 1.72  | -0.55 | -0.64 | 1.16  | -0.99 |
| Birni Ngaooure | 1.01 | 0.06  | 0.47  | -1.78 | 0.13  | -0.42 | 1.36 | -0.87 | -0.04 | -0.48 | -0.54 | -0.95 | 0.74  | 0.71  | 2.51 | -0.09 | -0.64 | -1.02 | 0.66  | -0.38 |
| Dan Kassari    | 0.24 | -0.54 | 1.30  | -1.57 | -0.83 | 0.40  | 0.97 | -0.78 | 0.31  | -0.84 | -0.36 | -1.09 | 0.62  | 1.12  | 1.66 | 0.84  | -0.68 | -0.75 | 0.24  | -1.24 |
| Dioundiou      | 1.41 | -0.88 | 1.02  | -2.02 | 0.52  | 0.76  | 1.65 | -1.21 | 0.08  | -0.33 | -0.38 | -0.41 | 2.33  | 0.18  | 2.15 | 1.54  | -0.81 | -0.14 | 0.08  | -0.24 |
| Dogon Kirya    | 0.20 | -0.58 | 1.58  | -1.65 | -0.83 | -0.67 | 0.87 | -0.95 | -0.14 | -0.80 | -1.02 | -1.12 | 0.98  | 1.30  | 1.98 | 1.68  | -0.76 | -0.94 | 0.92  | -0.68 |
| Dogondoutchi   | 0.86 | 0.23  | 1.32  | -1.99 | 0.02  | -0.50 | 1.04 | -0.11 | -0.14 | -0.98 | -0.68 | -0.28 | 0.46  | 0.99  | 1.44 | 1.15  | -1.08 | -0.31 | 0.43  | -1.10 |
| Dosso          | 1.48 | -0.21 | 0.38  | -2.05 | -0.07 | -0.32 | 1.92 | -0.74 | 0.26  | -0.74 | -0.79 | -0.67 | 1.00  | 0.88  | 2.88 | 0.11  | -1.00 | -0.80 | 0.49  | -0.47 |
| Doumaga        | 1.78 | -1.00 | 1.37  | -1.94 | 0.55  | 0.70  | 0.92 | -1.03 | -0.27 | -0.08 | -0.60 | -0.35 | 2.16  | 0.41  | 2.03 | 1.21  | -1.23 | 0.58  | -0.09 | -0.33 |
| Fabidji        | 1.85 | -0.87 | 0.45  | -2.01 | -0.03 | -0.24 | 1.64 | -0.83 | 0.36  | -0.13 | -0.82 | -1.06 | 0.90  | 0.86  | 2.93 | 0.43  | -1.02 | -0.75 | 0.56  | -0.20 |
| Fakara         | 1.02 | -0.87 | 0.86  | -1.72 | 0.41  | -0.54 | 1.21 | -0.94 | 0.09  | -0.35 | 0.14  | -1.10 | 0.80  | 0.47  | 2.59 | 0.04  | -0.64 | -0.54 | 0.69  | -0.26 |
| Falmey         | 1.63 | -0.84 | 0.13  | -2.19 | -0.36 | -0.16 | 1.57 | -1.10 | 0.84  | 0.22  | -0.83 | -1.33 | 1.10  | 0.31  | 3.18 | 1.50  | -1.48 | -0.51 | 0.63  | -0.41 |
| Falwel         | 0.26 | 0.22  | 1.52  | -2.07 | 0.38  | -0.39 | 1.13 | 0.07  | 0.40  | -0.78 | -0.45 | -0.44 | -0.13 | 1.36  | 1.22 | 1.35  | -0.44 | 0.02  | 0.43  | -0.84 |
| Farrey         | 1.48 | -1.15 | 1.00  | -2.28 | 0.38  | 0.41  | 2.19 | -1.44 | 0.54  | -0.44 | -0.36 | -0.40 | 2.45  | 0.28  | 2.25 | 1.33  | -1.01 | -0.57 | -0.14 | -0.62 |
| Garankedey     | 0.51 | 0.08  | 0.22  | -2.01 | -0.09 | -0.25 | 1.93 | -0.04 | 0.43  | -0.89 | -0.40 | -0.55 | 0.35  | 0.68  | 2.63 | 0.46  | 0.07  | -0.50 | 0.79  | -0.25 |
| Gaya           | 0.16 | -0.22 | -0.22 | -2.33 | -0.61 | 0.70  | 0.43 | -1.56 | 0.23  | 0.17  | -0.30 | -0.84 | 1.20  | -0.42 | 2.19 | 2.12  | -0.46 | -1.00 | 1.06  | -1.39 |
| Golle          | 2.11 | -0.70 | 0.43  | -2.19 | -0.19 | -0.12 | 1.63 | -1.13 | 0.49  | -0.56 | -0.60 | -0.57 | 1.72  | 0.58  | 3.10 | 0.89  | -1.16 | -0.72 | 0.34  | -0.21 |
| Gorou Bakassam | 1.52 | -0.38 | 0.59  | -2.30 | 0.33  | -0.11 | 2.06 | -1.02 | 0.46  | -0.57 | -0.56 | -0.33 | 1.82  | 0.74  | 2.38 | 0.96  | -1.04 | -0.41 | 0.27  | -0.22 |
| Guechemé       | 1.78 | -1.00 | 1.37  | -1.94 | 0.55  | 0.70  | 0.92 | -1.03 | -0.27 | -0.08 | -0.60 | -0.35 | 2.16  | 0.41  | 2.03 | 1.21  | -1.23 | 0.58  | -0.09 | -0.33 |
| Guilladjé      | 1.63 | -0.84 | 0.13  | -2.19 | -0.36 | -0.16 | 1.57 | -1.10 | 0.84  | 0.22  | -0.83 | -1.33 | 1.10  | 0.31  | 3.18 | 1.50  | -1.48 | -0.51 | 0.63  | -0.41 |
| Harikanassou   | 0.44 | -0.36 | 0.35  | -1.88 | 0.12  | -0.29 | 1.22 | -0.49 | 0.26  | -0.45 | -0.35 | -0.53 | 0.57  | 0.48  | 2.72 | 0.06  | -0.02 | -0.69 | 0.81  | -0.36 |
| Kankandi       | 1.85 | -0.87 | 0.45  | -2.01 | -0.03 | -0.24 | 1.64 | -0.83 | 0.36  | -0.13 | -0.82 | -1.06 | 0.90  | 0.86  | 2.93 | 0.43  | -1.02 | -0.75 | 0.56  | -0.20 |
| Kara Kara      | 1.51 | -1.20 | 1.24  | -2.12 | 0.35  | 0.54  | 1.58 | -1.15 | 0.28  | -0.43 | -0.52 | -0.41 | 2.71  | 0.51  | 2.50 | 0.97  | -0.90 | -0.03 | 0.07  | -0.14 |
| Kargui Bangou  | 1.51 | -1.20 | 1.24  | -2.12 | 0.35  | 0.54  | 1.58 | -1.15 | 0.28  | -0.43 | -0.52 | -0.41 | 2.71  | 0.51  | 2.50 | 0.97  | -0.90 | -0.03 | 0.07  | -0.14 |
| Kieché         | 0.99 | -0.57 | 1.39  | -1.99 | 0.19  | -0.04 | 0.87 | -0.24 | -0.35 | 0.30  | -0.39 | -0.88 | 1.49  | 0.61  | 1.64 | 1.44  | -1.19 | -0.51 | 0.49  | -0.92 |
| Kiota          | 0.44 | -0.36 | 0.35  | -1.88 | 0.12  | -0.29 | 1.22 | -0.49 | 0.26  | -0.45 | -0.35 | -0.53 | 0.57  | 0.48  | 2.72 | 0.06  | -0.02 | -0.69 | 0.81  | -0.36 |
| Kore Mairoua   | 1.23 | -0.66 | 1.00  | -2.10 | 0.46  | -0.31 | 1.36 | -0.17 | -0.27 | -0.38 | -0.55 | -0.56 | 1.19  | 0.83  | 1.61 | 1.34  | -1.17 | -0.11 | 0.49  | -0.92 |
| Koygolo        | 0.41 | -0.90 | 0.07  | -1.92 | -0.13 | -0.52 | 1.37 | -0.43 | 0.29  | -0.51 | 0.15  | -0.07 | -0.03 | 0.98  | 2.36 | 1.09  | 0.38  | -0.49 | 1.40  | -0.34 |
| Loga           | 0.10 | -0.36 | 0.73  | -1.95 | 0.15  | 0.30  | 1.91 | 0.16  | 0.65  | -0.91 | -0.26 | 0.09  | -0.22 | 0.87  | 1.82 | 1.65  | 0.00  | -0.02 | 0.92  | -0.67 |
| Matankari      | 0.44 | -0.55 | 1.93  | -1.64 | -0.41 | -0.26 | 0.86 | -0.89 | -0.04 | -0.58 | -0.54 | -1.15 | 0.83  | 1.58  | 1.07 | 1.27  | -1.14 | -0.39 | 0.50  | -0.97 |
| Mokko          | 0.37 | -0.32 | 0.24  | -2.10 | 0.28  | 0.00  | 2.04 | -0.26 | 0.76  | -0.98 | -0.16 | -0.14 | 0.56  | 1.11  | 2.27 | 1.10  | -0.65 | -0.46 | 0.65  | -0.46 |
| Ngonga         | 1.01 | 0.06  | 0.47  | -1.78 | 0.13  | -0.42 | 1.36 | -0.87 | -0.04 | -0.48 | -0.54 | -0.95 | 0.74  | 0.71  | 2.51 | -0.09 | -0.64 | -1.02 | 0.66  | -0.38 |
| Sambera        | 0.76 | -1.01 | -0.11 | -2.25 | -0.08 | 0.28  | 1.25 | -1.24 | 0.81  | 0.05  | -0.36 | -1.06 | 1.67  | -0.12 | 2.56 | 1.70  | -1.16 | -0.81 | 0.26  | -0.89 |
| Sokorbe        | 0.51 | 0.08  | 0.22  | -2.01 | -0.09 | -0.25 | 1.93 | -0.04 | 0.43  | -0.89 | -0.40 | -0.55 | 0.35  | 0.68  | 2.63 | 0.46  | 0.07  | -0.50 | 0.79  | -0.25 |
| Soucoucoutane  | 0.34 | -0.88 | 1.67  | -1.70 | -0.26 | -0.93 | 0.79 | -0.89 | -0.37 | -0.77 | -0.49 | -1.00 | 0.17  | 1.57  | 2.44 | 2.28  | -0.74 | -0.27 | 0.95  | -0.67 |
| Tanda          | 0.21 | -0.54 | -0.24 | -2.22 | -0.58 | 0.82  | 1.00 | -1.42 | 0.41  | -0.02 | -0.45 | -1.04 | 1.81  | -0.55 | 2.02 | 2.36  | -0.64 | -0.45 | 0.88  | -1.20 |
| Tessa          | 1.86 | -0.62 | 0.76  | -2.32 | 0.17  | 0.26  | 1.98 | -1.46 | 0.54  | -0.35 | -0.51 | -0.47 | 2.40  | 0.90  | 2.89 | 0.84  | -0.87 | -0.41 | 0.10  | -0.05 |
| Tibiri         | 1.35 | -1.04 | 1.25  | -2.16 | 0.39  | 0.36  | 1.16 | -0.43 | -0.23 | 0.03  | -0.54 | -0.41 | 1.78  | 0.66  | 1.86 | 1.63  | -1.33 | 0.35  | 0.28  | -0.82 |
| Tombokoarey 1  | 1.05 | -0.20 | 0.72  | -2.12 | 0.26  | -0.24 | 1.51 | -0.15 | 0.21  | -0.96 | 0.01  | -0.58 | 0.78  | 1.09  | 2.01 | 1.55  | -1.34 | -0.25 | 0.45  | -0.70 |
| Tombokoarey2   | 1.05 | -0.20 | 0.72  | -2.12 | 0.26  | -0.24 | 1.51 | -0.15 | 0.21  | -0.96 | 0.01  | -0.58 | 0.78  | 1.09  | 2.01 | 1.55  | -1.34 | -0.25 | 0.45  | -0.70 |
| Tounouga       | 0.12 | -0.32 | -0.48 | -2.35 | -0.63 | 0.81  | 1.03 | -1.04 | 0.04  | -0.03 | -0.57 | -0.97 | 1.26  | -0.30 | 2.06 | 1.72  | -0.55 | -0.64 | 1.16  | -0.99 |
| Yelou          | 0.21 | -0.54 | -0.24 | -2.22 | -0.58 | 0.82  | 1.00 | -1.42 | 0.41  | -0.02 | -0.45 | -1.04 | 1.81  | -0.55 | 2.02 | 2.36  | -0.64 | -0.45 | 0.88  | -1.20 |
| Zabori         | 1.41 | -0.88 | 1.02  | -2.02 | 0.52  | 0.76  | 1.65 | -1.21 | 0.08  | -0.33 | -0.38 | -0.41 | 2.33  | 0.18  | 2.15 | 1.54  | -0.81 | -0.14 | 0.08  | -0.24 |

| Municipality   | 1996  |       |       |       | 1997  |       |       |       | 1998  |       |       |      | 1999  |      |      |      | 2000  |       |       |       |
|----------------|-------|-------|-------|-------|-------|-------|-------|-------|-------|-------|-------|------|-------|------|------|------|-------|-------|-------|-------|
|                | 6     | 7     | 8     | 9     | 6     | 7     | 8     | 9     | 6     | 7     | 8     | 9    | 6     | 7    | 8    | 9    | 6     | 7     | 8     | 9     |
| Bana           | 1.00  | -1.49 | 0.61  | 0.35  | 0.66  | -1.24 | -1.10 | -0.38 | 1.09  | -0.18 | 0.12  | 0.83 | -2.31 | 1.01 | 0.94 | 2.41 | 0.01  | 0.06  | -0.27 | -0.76 |
| Bengou         | 0.48  | -1.38 | 0.30  | 0.32  | 0.78  | -1.41 | -1.02 | -0.24 | 0.78  | 0.00  | -0.05 | 0.91 | -2.36 | 0.48 | 0.67 | 2.43 | 0.05  | 0.05  | -0.24 | -0.75 |
| Birni Ngauore  | 0.33  | -1.52 | 1.22  | -0.99 | 0.49  | -0.75 | -1.18 | -0.04 | 1.43  | 0.16  | 0.47  | 1.63 | -1.75 | 0.96 | 0.27 | 2.46 | -0.57 | 2.21  | -0.48 | -1.36 |
| Dan Kassari    | 2.36  | -1.28 | -0.32 | -1.04 | 0.63  | -0.71 | -1.11 | -1.00 | -0.18 | -0.11 | 0.11  | 1.34 | -1.34 | 1.20 | 2.20 | 1.10 | -0.09 | 0.80  | -0.48 | -1.31 |
| Dioundiou      | 1.86  | -1.41 | 0.79  | -0.25 | 0.26  | -1.01 | -0.68 | -0.65 | 1.10  | -0.19 | -0.34 | 1.32 | -2.05 | 1.50 | 1.14 | 2.46 | -0.21 | 1.10  | -0.29 | -0.73 |
| Dogon Kirya    | 2.11  | -1.06 | -0.36 | -0.57 | 1.02  | -0.24 | -1.09 | -1.28 | 0.38  | 0.09  | -0.28 | 2.10 | -1.44 | 1.58 | 1.64 | 0.18 | 0.04  | 0.58  | -0.18 | -1.49 |
| Dogondoutchi   | 1.69  | -1.56 | 0.43  | -1.07 | 1.71  | 0.12  | -0.78 | -0.37 | 0.01  | -0.61 | 0.06  | 1.80 | -2.00 | 0.82 | 2.11 | 1.45 | 0.22  | 1.68  | -0.81 | -0.96 |
| Dosso          | 0.39  | -1.51 | 0.71  | -0.80 | 0.36  | -0.92 | -1.05 | 0.05  | 1.17  | -0.25 | 0.47  | 0.94 | -1.89 | 0.89 | 0.33 | 2.37 | -0.60 | 2.26  | -0.58 | -1.36 |
| Doumega        | 1.96  | -1.43 | 0.56  | -0.41 | 0.35  | -0.47 | -0.74 | -0.52 | 1.26  | -0.14 | -0.69 | 1.36 | -1.82 | 0.91 | 1.54 | 1.94 | -0.32 | 1.26  | 0.02  | -0.52 |
| Fabidji        | 0.47  | -1.60 | 0.46  | -0.93 | 0.11  | -0.57 | -0.95 | -0.13 | 0.86  | -0.15 | 0.12  | 0.68 | -1.94 | 1.49 | 0.13 | 2.29 | -0.63 | 1.98  | -0.65 | -1.13 |
| Fakara         | 0.08  | -1.55 | 1.19  | -0.83 | 0.87  | -0.57 | -1.40 | -0.05 | 1.14  | 0.31  | 0.78  | 2.20 | -1.17 | 0.68 | 0.28 | 2.25 | -0.47 | 1.90  | -0.74 | -1.22 |
| Falmey         | 1.19  | -1.93 | 0.23  | -0.66 | -0.03 | -1.02 | -1.25 | -0.10 | 0.34  | 0.17  | 0.23  | 0.33 | -1.90 | 2.29 | 0.00 | 1.51 | -0.59 | 1.31  | -0.33 | -1.01 |
| Falwel         | 1.73  | -1.77 | 0.64  | -1.11 | 2.03  | -0.11 | -1.06 | -0.22 | 0.37  | -0.40 | 0.06  | 1.53 | -1.97 | 0.56 | 1.53 | 1.92 | 0.17  | 1.72  | -0.92 | -1.07 |
| Farrey         | 1.26  | -1.51 | 0.92  | -0.23 | 0.46  | -1.03 | -0.83 | -0.65 | 1.31  | 0.12  | -0.19 | 0.67 | -1.96 | 1.28 | 0.63 | 2.55 | -0.47 | 1.20  | -0.42 | -0.79 |
| Garankedey     | 0.50  | -1.23 | 1.27  | -0.94 | 0.67  | -0.52 | -1.13 | 0.11  | 0.63  | 0.29  | 0.20  | 1.64 | -1.91 | 0.51 | 0.26 | 2.54 | -0.62 | 2.61  | -0.76 | -1.46 |
| Gaya           | 0.70  | -1.75 | 0.25  | -0.03 | 0.90  | -1.54 | -1.32 | -0.33 | 0.99  | -0.11 | 0.45  | 1.18 | -2.56 | 0.65 | 0.41 | 1.97 | 0.25  | -0.02 | -0.13 | -0.57 |
| Golle          | 0.68  | -1.64 | 0.25  | -0.69 | 0.38  | -0.88 | -0.96 | -0.40 | 1.08  | -0.26 | 0.26  | 0.17 | -1.73 | 1.56 | 0.24 | 1.76 | -0.71 | 2.18  | -0.52 | -1.20 |
| Gorou Bakassam | 0.81  | -1.77 | 0.82  | -0.70 | 0.64  | -0.80 | -1.03 | -0.27 | 0.86  | -0.40 | 0.06  | 0.96 | -1.97 | 0.77 | 0.63 | 2.37 | -0.67 | 2.14  | -0.46 | -1.17 |
| Guechemé       | 1.96  | -1.43 | 0.56  | -0.41 | 0.35  | -0.47 | -0.74 | -0.52 | 1.26  | -0.14 | -0.69 | 1.36 | -1.82 | 0.91 | 1.54 | 1.94 | -0.32 | 1.26  | 0.02  | -0.52 |
| Guilladje      | 1.19  | -1.93 | 0.23  | -0.66 | -0.03 | -1.02 | -1.25 | -0.10 | 0.34  | 0.17  | 0.23  | 0.33 | -1.90 | 2.29 | 0.00 | 1.51 | -0.59 | 1.31  | -0.33 | -1.01 |
| Harikanassou   | 0.40  | -1.36 | 1.64  | -0.92 | 0.45  | -0.72 | -1.32 | 0.30  | 0.92  | 0.24  | 0.33  | 2.09 | -1.83 | 1.07 | 0.30 | 2.59 | -0.63 | 2.38  | -0.57 | -1.43 |
| Kankandi       | 0.47  | -1.60 | 0.46  | -0.93 | 0.11  | -0.57 | -0.95 | -0.13 | 0.86  | -0.15 | 0.12  | 0.68 | -1.94 | 1.49 | 0.13 | 2.29 | -0.63 | 1.98  | -0.65 | -1.13 |
| Kara Kara      | 1.68  | -1.65 | 0.78  | -0.35 | 0.42  | -0.70 | -0.61 | -0.51 | 1.11  | -0.37 | -0.51 | 1.58 | -1.89 | 1.23 | 0.90 | 2.33 | -0.42 | 1.48  | -0.74 | -0.57 |
| Kargui Bangou  | 1.68  | -1.65 | 0.78  | -0.35 | 0.42  | -0.70 | -0.61 | -0.51 | 1.11  | -0.37 | -0.51 | 1.58 | -1.89 | 1.23 | 0.90 | 2.33 | -0.42 | 1.48  | -0.74 | -0.57 |
| Kieché         | 2.63  | -1.84 | 0.58  | -0.49 | 1.08  | 0.50  | -0.93 | -0.80 | 0.02  | -0.69 | -0.34 | 1.87 | -1.90 | 0.33 | 1.84 | 1.16 | 0.01  | 1.62  | -0.52 | -0.86 |
| Kiota          | 0.40  | -1.36 | 1.64  | -0.92 | 0.45  | -0.72 | -1.32 | 0.30  | 0.92  | 0.24  | 0.33  | 2.09 | -1.83 | 1.07 | 0.30 | 2.59 | -0.63 | 2.38  | -0.57 | -1.43 |
| Kore Mairoua   | 1.93  | -1.83 | 0.61  | -0.89 | 1.64  | 0.38  | -0.82 | -0.53 | 0.08  | -0.31 | -0.23 | 1.92 | -2.16 | 0.82 | 2.01 | 1.61 | 0.13  | 1.98  | -0.48 | -0.71 |
| Koygolo        | -0.13 | -0.88 | 1.79  | -0.99 | 0.46  | 0.15  | -1.75 | -0.66 | 0.34  | 0.69  | 0.10  | 1.19 | -1.87 | 0.98 | 0.88 | 2.37 | -1.03 | 2.24  | -0.96 | -1.40 |
| Loga           | 1.27  | -1.32 | 1.00  | -1.24 | 2.01  | -0.21 | -1.42 | -0.33 | 0.47  | 0.29  | -0.02 | 1.34 | -1.92 | 0.36 | 1.11 | 2.02 | -0.27 | 2.17  | -0.94 | -1.34 |
| Matankari      | 2.07  | -1.30 | 0.04  | -0.96 | 1.20  | -0.19 | -0.98 | -0.96 | 0.02  | -0.30 | 0.16  | 1.90 | -1.63 | 0.89 | 2.00 | 0.81 | -0.07 | 1.29  | -0.61 | -1.43 |
| Mokko          | 0.82  | -1.36 | 1.06  | -1.01 | 1.17  | -0.69 | -1.09 | -0.15 | 0.60  | -0.07 | -0.34 | 1.16 | -2.20 | 0.05 | 0.74 | 2.32 | -0.56 | 2.29  | -0.88 | -1.37 |
| Ngonga         | 0.33  | -1.52 | 1.22  | -0.99 | 0.49  | -0.75 | -1.18 | -0.04 | 1.43  | 0.16  | 0.47  | 1.63 | -1.75 | 0.96 | 0.27 | 2.46 | -0.57 | 2.21  | -0.48 | -1.36 |
| Sambere        | 0.77  | -1.59 | 0.54  | -0.16 | 0.71  | -1.18 | -1.17 | -0.21 | 0.45  | 0.78  | 0.26  | 0.40 | -2.48 | 1.47 | 0.43 | 2.21 | -0.31 | 0.76  | -0.25 | -0.95 |
| Sokorbe        | 0.50  | -1.23 | 1.27  | -0.94 | 0.67  | -0.52 | -1.13 | 0.11  | 0.63  | 0.29  | 0.20  | 1.64 | -1.91 | 0.51 | 0.26 | 2.54 | -0.62 | 2.61  | -0.76 | -1.46 |
| Soucoucoutane  | 1.99  | -1.14 | -0.25 | -0.71 | 1.81  | -0.46 | -0.87 | -1.16 | 0.43  | 0.28  | -0.04 | 1.41 | -1.60 | 1.60 | 1.46 | 0.16 | -0.27 | 1.04  | -0.44 | -1.53 |
| Tanda          | 0.82  | -1.50 | 0.46  | -0.20 | 0.78  | -1.41 | -1.20 | -0.14 | 1.25  | 0.12  | 0.43  | 0.71 | -2.52 | 0.91 | 0.61 | 2.27 | 0.10  | 0.21  | -0.27 | -0.84 |
| Tessa          | 1.32  | -1.72 | 0.50  | -0.41 | 0.55  | -0.75 | -0.78 | -0.52 | 0.94  | -0.34 | -0.19 | 0.57 | -1.83 | 1.24 | 0.43 | 2.26 | -0.69 | 1.64  | -0.33 | -0.88 |
| Tibiri         | 2.24  | -1.70 | 0.72  | -0.72 | 1.06  | 0.01  | -0.65 | -0.71 | 0.62  | -0.18 | -0.65 | 1.73 | -2.07 | 1.16 | 1.66 | 1.58 | -0.09 | 1.86  | -0.33 | -0.43 |
| Tombokoarey 1  | 1.40  | -1.61 | 0.76  | -1.05 | 1.50  | -0.14 | -0.88 | -0.53 | 0.22  | -0.44 | -0.16 | 1.51 | -2.22 | 0.62 | 1.72 | 2.07 | -0.16 | 2.10  | -0.69 | -0.91 |
| Tombokoarey2   | 1.40  | -1.61 | 0.76  | -1.05 | 1.50  | -0.14 | -0.88 | -0.53 | 0.22  | -0.44 | -0.16 | 1.51 | -2.22 | 0.62 | 1.72 | 2.07 | -0.16 | 2.10  | -0.69 | -0.91 |
| Tounouga       | 0.48  | -1.38 | 0.30  | 0.32  | 0.78  | -1.41 | -1.02 | -0.24 | 0.78  | 0.00  | -0.05 | 0.91 | -2.36 | 0.48 | 0.67 | 2.43 | 0.05  | 0.05  | -0.24 | -0.75 |
| Yelou          | 0.82  | -1.50 | 0.46  | -0.20 | 0.78  | -1.41 | -1.20 | -0.14 | 1.25  | 0.12  | 0.43  | 0.71 | -2.52 | 0.91 | 0.61 | 2.27 | 0.10  | 0.21  | -0.27 | -0.84 |
| Zabori         | 1.86  | -1.41 | 0.79  | -0.25 | 0.26  | -1.01 | -0.68 | -0.65 | 1.10  | -0.19 | -0.34 | 1.32 | -2.05 | 1.50 | 1.14 | 2.46 | -0.21 | 1.10  | -0.29 | -0.73 |

| Municipality   | 2001  |      |       |       | 2002  |       |       |      | 2003  |       |       |      | 2004  |       |       |       | 2005 |      |       |       |
|----------------|-------|------|-------|-------|-------|-------|-------|------|-------|-------|-------|------|-------|-------|-------|-------|------|------|-------|-------|
|                | 6     | 7    | 8     | 9     | 6     | 7     | 8     | 9    | 6     | 7     | 8     | 9    | 6     | 7     | 8     | 9     | 6    | 7    | 8     | 9     |
| Bana           | 0.33  | 1.67 | 0.66  | -0.71 | 0.19  | 1.46  | -0.32 | 0.98 | -0.33 | 0.65  | 1.50  | 0.87 | -0.39 | -0.15 | -0.69 | -0.32 | 0.09 | 0.96 | -0.34 | 1.07  |
| Bengou         | 0.75  | 1.52 | 0.76  | -0.85 | 0.26  | 1.68  | -0.37 | 0.40 | -0.24 | 1.29  | 1.61  | 0.73 | -0.19 | -0.16 | -0.86 | -0.19 | 0.30 | 1.18 | -0.52 | 1.03  |
| Birni Ngoure   | 1.33  | 1.89 | -1.09 | -0.50 | 0.39  | -0.07 | -0.47 | 1.71 | 0.44  | -0.23 | -0.30 | 0.85 | -0.38 | 0.16  | -0.62 | -0.44 | 1.00 | 0.70 | -0.07 | 0.37  |
| Dan Kassari    | -0.69 | 0.26 | -0.90 | 0.37  | -0.74 | 0.12  | -1.02 | 0.85 | 1.95  | -1.18 | 0.20  | 0.66 | -0.93 | 0.45  | 0.62  | -0.56 | 1.77 | 0.96 | -0.41 | -0.27 |
| Dioundiou      | -0.88 | 0.63 | 0.21  | -0.72 | -0.20 | 1.41  | -0.65 | 1.27 | -0.10 | 0.66  | 0.87  | 1.22 | -1.03 | -0.11 | -0.10 | -0.71 | 0.53 | 0.38 | -0.23 | 0.89  |
| Dogon Kirya    | -0.38 | 0.66 | -0.46 | 0.06  | -0.59 | -0.26 | -1.04 | 0.92 | 1.93  | -0.90 | 0.40  | 0.56 | -1.06 | 0.67  | 0.56  | -0.67 | 1.32 | 0.95 | -0.24 | -0.41 |
| Dogondoutchi   | -0.77 | 1.05 | -0.69 | -0.41 | -0.06 | -0.38 | -0.77 | 2.01 | 2.21  | -0.92 | -0.15 | 0.80 | -1.13 | -0.07 | 0.52  | -0.34 | 1.29 | 0.60 | -0.05 | -0.24 |
| Dosso          | 1.30  | 1.71 | -0.98 | -0.60 | 0.43  | 0.27  | -0.55 | 1.75 | 0.49  | 0.06  | -0.15 | 0.90 | -0.61 | 0.03  | -0.37 | -0.59 | 0.82 | 0.51 | -0.19 | 0.18  |
| Doumega        | -0.95 | 0.38 | 0.34  | -0.71 | -0.35 | 1.23  | -0.48 | 1.25 | 0.17  | 0.78  | 0.66  | 1.36 | -1.30 | 0.07  | -0.13 | -0.95 | 0.76 | 0.54 | -0.39 | 0.15  |
| Fabidji        | 1.09  | 1.52 | -0.76 | -0.64 | 0.90  | 0.17  | -0.46 | 1.65 | 0.50  | 0.34  | 0.35  | 0.66 | -0.92 | 0.44  | -0.36 | -0.46 | 0.63 | 0.56 | -0.02 | 0.82  |
| Fakara         | 0.74  | 1.60 | -1.03 | -0.49 | 0.27  | -0.24 | -0.29 | 0.94 | 0.36  | -0.78 | -0.25 | 0.31 | -0.49 | 0.33  | -0.81 | -0.47 | 1.23 | 1.02 | 0.01  | 0.40  |
| Falmey         | 0.05  | 1.70 | -0.39 | -0.87 | 0.90  | 0.60  | -0.33 | 1.60 | 0.58  | 0.50  | 1.12  | 0.85 | -1.33 | 0.55  | -0.33 | -0.31 | 0.56 | 0.47 | -0.29 | 0.84  |
| Falwel         | -0.22 | 1.51 | -0.94 | -0.47 | -0.18 | -0.41 | -0.92 | 1.90 | 1.93  | -0.73 | -0.09 | 0.72 | -1.23 | -0.34 | 0.51  | -0.42 | 0.97 | 0.45 | -0.24 | -0.30 |
| Farrey         | -0.70 | 0.91 | -0.13 | -0.81 | -0.16 | 1.29  | -0.71 | 1.58 | -0.10 | 0.62  | 0.87  | 0.97 | -1.37 | -0.02 | -0.19 | -0.44 | 0.44 | 0.43 | -0.20 | 1.02  |
| Garankedey     | 1.31  | 2.00 | -1.34 | -0.34 | 0.16  | -0.36 | -0.68 | 1.82 | 1.53  | -0.67 | -0.51 | 0.82 | -0.80 | -0.01 | -0.17 | -0.40 | 0.87 | 0.47 | -0.24 | -0.16 |
| Gaya           | 0.68  | 1.85 | 0.53  | -0.90 | 0.02  | 1.61  | -0.37 | 0.69 | -0.21 | 1.55  | 1.99  | 0.73 | -0.42 | -0.47 | -0.73 | 0.14  | 0.71 | 1.16 | -0.47 | 1.08  |
| Golle          | 0.88  | 1.16 | -0.62 | -0.69 | 0.55  | 0.89  | -0.61 | 1.59 | 0.26  | 0.66  | 0.59  | 0.85 | -1.31 | 0.18  | -0.16 | -0.50 | 0.41 | 0.47 | -0.12 | 0.70  |
| Gorou Bakassam | 0.45  | 1.35 | -0.71 | -0.62 | 0.35  | 0.50  | -0.62 | 1.78 | 0.50  | 0.28  | -0.07 | 0.90 | -1.26 | -0.17 | -0.04 | -0.32 | 0.81 | 0.61 | -0.41 | 0.05  |
| Guechemé       | -0.95 | 0.38 | 0.34  | -0.71 | -0.35 | 1.23  | -0.48 | 1.25 | 0.17  | 0.78  | 0.66  | 1.36 | -1.30 | 0.07  | -0.13 | -0.95 | 0.76 | 0.54 | -0.39 | 0.15  |
| Guilladjé      | 0.05  | 1.70 | -0.39 | -0.87 | 0.90  | 0.60  | -0.33 | 1.60 | 0.58  | 0.50  | 1.12  | 0.85 | -1.33 | 0.55  | -0.33 | -0.31 | 0.56 | 0.47 | -0.29 | 0.84  |
| Harikanassou   | 1.39  | 2.18 | -1.29 | 0.04  | -0.18 | -0.27 | -0.65 | 1.42 | 0.99  | -0.86 | -0.28 | 0.83 | -0.48 | 0.15  | -0.44 | -0.54 | 1.29 | 0.77 | -0.06 | -0.11 |
| Kankandi       | 1.09  | 1.52 | -0.76 | -0.64 | 0.90  | 0.17  | -0.46 | 1.65 | 0.50  | 0.34  | 0.35  | 0.66 | -0.92 | 0.44  | -0.36 | -0.46 | 0.63 | 0.56 | -0.02 | 0.82  |
| Kara Kara      | -0.68 | 0.51 | 0.10  | -0.69 | -0.14 | 1.26  | -0.55 | 1.49 | 0.09  | 0.82  | 0.56  | 1.26 | -1.43 | 0.05  | -0.23 | -0.82 | 0.74 | 0.33 | -0.41 | 0.31  |
| Kargui Bangou  | -0.68 | 0.51 | 0.10  | -0.69 | -0.14 | 1.26  | -0.55 | 1.49 | 0.09  | 0.82  | 0.56  | 1.26 | -1.43 | 0.05  | -0.23 | -0.82 | 0.74 | 0.33 | -0.41 | 0.31  |
| Kieché         | -0.91 | 0.52 | -0.25 | -0.72 | -0.24 | 0.17  | -0.57 | 1.78 | 1.53  | -0.51 | 0.15  | 0.84 | -0.92 | 0.23  | 0.63  | -0.45 | 0.88 | 0.28 | -0.23 | -0.37 |
| Kiota          | 1.39  | 2.18 | -1.29 | 0.04  | -0.18 | -0.27 | -0.65 | 1.42 | 0.99  | -0.86 | -0.28 | 0.83 | -0.48 | 0.15  | -0.44 | -0.54 | 1.29 | 0.77 | -0.06 | -0.11 |
| Kore Mairoua   | -0.74 | 0.99 | -0.20 | -0.66 | 0.03  | 0.05  | -0.56 | 1.91 | 1.91  | -0.43 | 0.21  | 0.93 | -0.96 | 0.02  | 0.44  | -0.45 | 0.89 | 0.46 | -0.22 | -0.31 |
| Koygolo        | 1.05  | 2.17 | -1.45 | 0.58  | -0.45 | -0.18 | -0.78 | 1.41 | 1.53  | -0.92 | 0.13  | 0.75 | -0.25 | -0.20 | -0.04 | -0.48 | 1.33 | 0.50 | -0.42 | -0.26 |
| Loga           | 0.49  | 2.10 | -1.37 | -0.04 | -0.19 | -0.53 | -1.04 | 1.94 | 1.89  | -0.78 | -0.15 | 0.60 | -1.08 | -0.62 | 0.30  | -0.32 | 0.87 | 0.05 | -0.30 | -0.18 |
| Matankari      | -0.80 | 0.50 | -0.87 | 0.16  | -0.37 | -0.16 | -1.03 | 1.52 | 2.09  | -1.13 | 0.20  | 0.68 | -1.11 | 0.61  | 0.59  | -0.28 | 1.54 | 0.83 | -0.29 | -0.48 |
| Mokko          | 0.93  | 1.89 | -1.17 | -0.74 | 0.41  | -0.20 | -0.72 | 1.91 | 1.66  | -0.55 | -0.48 | 0.69 | -1.27 | -0.27 | 0.13  | -0.16 | 0.83 | 0.56 | -0.47 | -0.17 |
| Ngonga         | 1.33  | 1.89 | -1.09 | -0.50 | 0.39  | -0.07 | -0.47 | 1.71 | 0.44  | -0.23 | -0.30 | 0.85 | -0.38 | 0.16  | -0.62 | -0.44 | 1.00 | 0.70 | -0.07 | 0.37  |
| Sambere        | -0.48 | 1.92 | -0.13 | -1.04 | 0.48  | 1.21  | -0.26 | 1.34 | 0.17  | 0.41  | 1.43  | 0.80 | -1.31 | -0.38 | -0.15 | -0.30 | 0.72 | 0.71 | -0.22 | 0.86  |
| Sokorbe        | 1.31  | 2.00 | -1.34 | -0.34 | 0.16  | -0.36 | -0.68 | 1.82 | 1.53  | -0.67 | -0.51 | 0.82 | -0.80 | -0.01 | -0.17 | -0.40 | 0.87 | 0.47 | -0.24 | -0.16 |
| Soucoucoutane  | -0.16 | 1.13 | -0.52 | 0.33  | -0.07 | -0.27 | -0.92 | 1.33 | 1.44  | -0.46 | 0.18  | 0.76 | -0.93 | 0.61  | 0.65  | -0.64 | 1.37 | 0.59 | 0.12  | -0.48 |
| Tanda          | 0.26  | 1.93 | 0.60  | -0.92 | -0.01 | 1.46  | -0.24 | 1.18 | -0.49 | 0.39  | 1.68  | 0.84 | -0.71 | -0.37 | -0.61 | -0.02 | 0.50 | 0.90 | -0.44 | 0.72  |
| Tessa          | 0.05  | 0.87 | -0.35 | -0.64 | 0.07  | 1.16  | -0.62 | 1.49 | 0.01  | 0.84  | 0.63  | 1.02 | -1.52 | -0.05 | -0.22 | -0.60 | 0.62 | 0.41 | -0.21 | 0.69  |
| Tibiri         | -0.80 | 0.52 | -0.19 | -0.68 | -0.07 | 0.85  | -0.30 | 1.47 | 1.01  | 0.28  | 0.39  | 1.45 | -1.21 | 0.33  | 0.31  | -0.62 | 0.97 | 0.25 | -0.45 | -0.11 |
| Tombokoarey 1  | -0.17 | 1.51 | -0.64 | -0.84 | 0.30  | -0.13 | -0.69 | 2.02 | 1.94  | -0.65 | -0.08 | 0.89 | -1.16 | -0.14 | 0.33  | -0.25 | 0.91 | 0.66 | -0.52 | -0.26 |
| Tombokoarey2   | -0.17 | 1.51 | -0.64 | -0.84 | 0.30  | -0.13 | -0.69 | 2.02 | 1.94  | -0.65 | -0.08 | 0.89 | -1.16 | -0.14 | 0.33  | -0.25 | 0.91 | 0.66 | -0.52 | -0.26 |
| Tounouga       | 0.75  | 1.52 | 0.76  | -0.85 | 0.26  | 1.68  | -0.37 | 0.40 | -0.24 | 1.29  | 1.61  | 0.73 | -0.19 | -0.16 | -0.86 | -0.19 | 0.30 | 1.18 | -0.52 | 1.03  |
| Yelou          | 0.26  | 1.93 | 0.60  | -0.92 | -0.01 | 1.46  | -0.24 | 1.18 | -0.49 | 0.39  | 1.68  | 0.84 | -0.71 | -0.37 | -0.61 | -0.02 | 0.50 | 0.90 | -0.44 | 0.72  |
| Zabori         | -0.88 | 0.63 | 0.21  | -0.72 | -0.20 | 1.41  | -0.65 | 1.27 | -0.10 | 0.66  | 0.87  | 1.22 | -1.03 | -0.11 | -0.10 | -0.71 | 0.53 | 0.38 | -0.23 | 0.89  |

| Municipality   | 2006  |      |       |       | 2007  |       |      |       | 2008  |       |       |       | 2009  |       |       |       | 2010 |       |      |       |
|----------------|-------|------|-------|-------|-------|-------|------|-------|-------|-------|-------|-------|-------|-------|-------|-------|------|-------|------|-------|
|                | 6     | 7    | 8     | 9     | 6     | 7     | 8    | 9     | 6     | 7     | 8     | 9     | 6     | 7     | 8     | 9     | 6    | 7     | 8    | 9     |
| Bana           | -1.82 | 2.11 | 0.70  | 0.42  | 0.03  | 0.04  | 1.61 | -0.74 | 0.24  | -0.67 | -0.13 | 0.22  | 0.40  | -0.24 | -0.18 | -0.19 | 1.22 | -0.66 | 0.21 | -1.00 |
| Bengou         | -1.94 | 1.67 | 0.27  | 0.25  | -0.22 | -0.01 | 2.26 | -0.87 | 0.25  | -0.84 | 0.26  | 0.34  | 0.58  | -0.12 | 0.06  | 0.00  | 1.13 | -1.07 | 0.14 | -1.38 |
| Birni Ngaoure  | -1.99 | 1.68 | 0.00  | -0.27 | -0.32 | 0.71  | 0.89 | -0.33 | 0.18  | -0.31 | 0.50  | -0.80 | -0.12 | -0.01 | -0.50 | 0.17  | 1.97 | -0.56 | 0.85 | 0.14  |
| Dan Kassari    | -0.58 | 0.67 | -0.32 | 2.42  | -0.79 | 1.19  | 0.99 | -1.01 | 2.21  | -0.63 | 0.33  | 0.22  | -0.11 | -0.53 | -1.55 | 0.14  | 1.44 | -0.34 | 0.62 | 0.70  |
| Dioundiou      | -1.41 | 1.63 | -0.15 | 0.50  | 0.05  | -0.22 | 1.27 | -0.70 | 0.04  | -0.40 | 0.15  | -0.59 | -0.38 | -0.33 | -0.61 | -0.37 | 1.27 | -1.08 | 0.47 | -0.75 |
| Dogon Kirya    | -1.04 | 1.00 | -0.42 | 1.69  | -0.46 | 1.38  | 0.99 | -0.81 | 2.36  | -0.85 | 0.26  | 0.04  | -0.33 | -0.20 | -1.21 | 0.67  | 1.27 | 0.06  | 0.47 | 0.49  |
| Dogondoutchi   | -1.20 | 1.65 | -0.40 | 1.80  | -0.72 | 0.89  | 1.31 | -1.01 | 1.16  | -0.34 | 0.50  | -0.40 | -0.29 | 0.23  | -1.04 | -0.10 | 1.27 | -0.32 | 0.74 | 0.52  |
| Dosso          | -1.96 | 1.67 | 0.01  | -0.20 | -0.12 | 0.63  | 1.00 | -0.37 | -0.04 | -0.07 | 0.58  | -0.74 | -0.27 | -0.05 | -0.40 | 0.08  | 1.57 | -0.69 | 0.90 | 0.09  |
| Doumaga        | -0.98 | 1.56 | 0.05  | 1.83  | -0.46 | -0.46 | 1.15 | -0.76 | 0.41  | -0.44 | 0.04  | -0.36 | -0.33 | -0.28 | -0.87 | -0.44 | 1.45 | -1.26 | 0.49 | -0.52 |
| Fabidji        | -2.15 | 1.36 | -0.05 | -0.49 | -0.18 | 0.75  | 1.09 | -0.57 | 0.00  | -0.38 | 0.70  | -0.73 | -0.79 | -0.43 | -0.51 | 0.16  | 1.59 | -0.59 | 1.06 | 0.13  |
| Fakara         | -1.83 | 1.88 | 0.01  | -0.29 | -0.32 | 0.83  | 0.89 | -0.55 | 0.29  | -0.56 | 0.34  | -0.88 | -0.17 | 0.07  | -0.71 | -0.02 | 1.55 | -0.48 | 0.91 | 0.20  |
| Falmey         | -1.78 | 1.38 | -0.12 | -0.38 | -0.13 | 0.20  | 0.94 | -0.68 | 0.01  | -0.47 | 0.90  | -0.58 | -0.87 | -0.43 | -0.42 | -0.10 | 1.51 | -0.39 | 0.65 | -0.11 |
| Falwel         | -1.19 | 1.60 | -0.50 | 1.22  | -0.56 | 0.99  | 1.29 | -0.89 | 0.91  | -0.53 | 0.44  | -0.82 | -0.37 | 0.10  | -0.86 | 0.00  | 1.18 | -0.35 | 0.79 | 0.37  |
| Farrey         | -1.39 | 2.08 | -0.12 | 0.27  | 0.04  | -0.01 | 1.31 | -0.44 | -0.07 | -0.16 | 0.38  | -0.43 | -0.50 | -0.17 | -0.42 | -0.09 | 1.39 | -0.93 | 0.49 | -0.41 |
| Garankedey     | -2.19 | 1.57 | 0.31  | -0.09 | -0.10 | 0.82  | 0.94 | -0.69 | 0.18  | -0.35 | 0.73  | -1.00 | 0.20  | -0.01 | -0.50 | -0.27 | 1.49 | -0.56 | 0.88 | 0.17  |
| Gaya           | -1.86 | 1.75 | 0.25  | 0.22  | -0.17 | -0.26 | 1.99 | -0.52 | 0.26  | -0.68 | 0.01  | 0.43  | 1.02  | 0.09  | 0.05  | 0.16  | 1.12 | -0.95 | 0.07 | -1.01 |
| Golle          | -1.92 | 1.50 | -0.06 | -0.31 | -0.29 | 0.27  | 1.24 | -0.33 | -0.14 | 0.01  | 0.66  | -0.69 | -0.88 | -0.25 | -0.46 | 0.29  | 1.59 | -0.85 | 0.92 | 0.04  |
| Gorou Bakassam | -1.75 | 1.64 | -0.19 | 0.21  | -0.29 | 0.39  | 1.28 | -0.34 | -0.18 | -0.02 | 0.61  | -0.61 | -0.53 | -0.03 | -0.49 | -0.06 | 1.26 | -0.87 | 0.77 | -0.03 |
| Guechemé       | -0.98 | 1.56 | 0.05  | 1.83  | -0.46 | -0.46 | 1.15 | -0.76 | 0.41  | -0.44 | 0.04  | -0.36 | -0.33 | -0.28 | -0.87 | -0.44 | 1.45 | -1.26 | 0.49 | -0.52 |
| Guilladje      | -1.78 | 1.38 | -0.12 | -0.38 | -0.13 | 0.20  | 0.94 | -0.68 | 0.01  | -0.47 | 0.90  | -0.58 | -0.87 | -0.43 | -0.42 | -0.10 | 1.51 | -0.39 | 0.65 | -0.11 |
| Harikanassou   | -1.85 | 1.54 | 0.25  | -0.15 | -0.19 | 0.65  | 0.75 | -0.62 | 0.33  | -0.49 | 0.62  | -0.98 | 0.56  | 0.02  | -0.50 | -0.18 | 1.61 | -0.48 | 0.86 | 0.28  |
| Kankandi       | -2.15 | 1.36 | -0.05 | -0.49 | -0.18 | 0.75  | 1.09 | -0.57 | 0.00  | -0.38 | 0.70  | -0.73 | -0.79 | -0.43 | -0.51 | 0.16  | 1.59 | -0.59 | 1.06 | 0.13  |
| Kara Kara      | -1.27 | 1.57 | -0.09 | 0.95  | -0.32 | -0.26 | 1.09 | -0.50 | 0.13  | -0.19 | 0.29  | -0.57 | -0.62 | -0.17 | -0.67 | -0.43 | 1.27 | -1.28 | 0.53 | -0.50 |
| Kargui Bangou  | -1.27 | 1.57 | -0.09 | 0.95  | -0.32 | -0.26 | 1.09 | -0.50 | 0.13  | -0.19 | 0.29  | -0.57 | -0.62 | -0.17 | -0.67 | -0.43 | 1.27 | -1.28 | 0.53 | -0.50 |
| Kieché         | -0.80 | 1.55 | 0.14  | 2.09  | -0.82 | 0.21  | 1.39 | -0.92 | 0.91  | -0.13 | 0.55  | 0.08  | -0.46 | -0.07 | -1.14 | -0.29 | 1.75 | -0.34 | 0.52 | 0.13  |
| Kiota          | -1.85 | 1.54 | 0.25  | -0.15 | -0.19 | 0.65  | 0.75 | -0.62 | 0.33  | -0.49 | 0.62  | -0.98 | 0.56  | 0.02  | -0.50 | -0.18 | 1.61 | -0.48 | 0.86 | 0.28  |
| Kore Mairoua   | -1.09 | 1.54 | -0.05 | 1.60  | -0.65 | 0.37  | 1.40 | -0.83 | 0.56  | -0.23 | 0.52  | -0.32 | -0.39 | 0.14  | -0.82 | -0.31 | 1.37 | -0.62 | 0.59 | 0.00  |
| Koygolo        | -1.78 | 1.78 | 0.01  | -0.33 | -0.24 | 1.02  | 0.85 | -0.84 | 0.63  | -0.83 | 0.64  | -1.09 | 0.88  | -0.20 | -0.52 | -0.12 | 1.46 | -0.39 | 0.78 | 0.42  |
| Loga           | -1.66 | 1.55 | -0.29 | 0.35  | -0.43 | 1.09  | 1.23 | -0.89 | 0.54  | -0.44 | 0.67  | -1.13 | -0.19 | 0.00  | -0.60 | -0.01 | 1.33 | -0.59 | 0.44 | 0.28  |
| Matankari      | -1.20 | 1.12 | -0.44 | 1.83  | -0.77 | 1.56  | 1.01 | -1.06 | 1.78  | -0.64 | 0.46  | 0.03  | -0.02 | -0.22 | -1.39 | 0.10  | 1.29 | -0.20 | 0.69 | 0.71  |
| Mokko          | -1.86 | 1.65 | -0.10 | 0.19  | -0.31 | 0.76  | 1.22 | -0.74 | 0.11  | -0.16 | 0.77  | -0.91 | -0.33 | 0.06  | -0.48 | -0.11 | 1.50 | -0.58 | 0.74 | 0.12  |
| Ngonga         | -1.99 | 1.68 | 0.00  | -0.27 | -0.32 | 0.71  | 0.89 | -0.33 | 0.18  | -0.31 | 0.50  | -0.80 | -0.12 | -0.01 | -0.50 | 0.17  | 1.97 | -0.56 | 0.85 | 0.14  |
| Sambéra        | -1.49 | 2.03 | 0.15  | 0.18  | 0.09  | 0.04  | 1.20 | -0.61 | 0.20  | -0.39 | 0.32  | -0.41 | -0.16 | -0.21 | -0.31 | 0.10  | 1.40 | -0.45 | 0.40 | -0.18 |
| Sokorbe        | -2.19 | 1.57 | 0.31  | -0.09 | -0.10 | 0.82  | 0.94 | -0.69 | 0.18  | -0.35 | 0.73  | -1.00 | 0.20  | -0.01 | -0.50 | -0.27 | 1.49 | -0.56 | 0.88 | 0.17  |
| Soucoucoutane  | -1.05 | 1.50 | -0.35 | 1.44  | -0.67 | 1.56  | 1.18 | -0.85 | 2.31  | -0.71 | 0.26  | -0.18 | -0.34 | -0.29 | -1.03 | 0.89  | 1.27 | -0.03 | 0.42 | 0.51  |
| Tanda          | -1.84 | 2.16 | 0.40  | 0.31  | -0.03 | -0.16 | 1.44 | -0.31 | 0.21  | -0.55 | -0.28 | 0.06  | 0.55  | -0.20 | -0.25 | -0.12 | 1.36 | -0.53 | 0.18 | -0.60 |
| Tessa          | -1.64 | 1.82 | -0.17 | 0.11  | -0.29 | -0.12 | 1.21 | -0.14 | -0.14 | -0.03 | 0.48  | -0.68 | -0.74 | -0.06 | -0.52 | 0.07  | 1.33 | -1.08 | 0.72 | -0.15 |
| Tibiri         | -0.88 | 1.32 | 0.15  | 1.67  | -0.69 | -0.25 | 1.30 | -0.79 | 0.47  | -0.47 | 0.24  | -0.25 | -0.39 | -0.05 | -0.72 | -0.41 | 1.40 | -1.06 | 0.64 | -0.14 |
| Tombokoarey 1  | -1.36 | 1.53 | -0.35 | 0.78  | -0.49 | 0.56  | 1.39 | -0.74 | 0.38  | -0.36 | 0.59  | -0.62 | -0.39 | 0.17  | -0.59 | -0.22 | 1.53 | -0.59 | 0.56 | 0.07  |
| Tombokoarey2   | -1.36 | 1.53 | -0.35 | 0.78  | -0.49 | 0.56  | 1.39 | -0.74 | 0.38  | -0.36 | 0.59  | -0.62 | -0.39 | 0.17  | -0.59 | -0.22 | 1.53 | -0.59 | 0.56 | 0.07  |
| Tounouga       | -1.94 | 1.67 | 0.27  | 0.25  | -0.22 | -0.01 | 2.26 | -0.87 | 0.25  | -0.84 | 0.26  | 0.34  | 0.58  | -0.12 | 0.06  | 0.00  | 1.13 | -1.07 | 0.14 | -1.38 |
| Yelou          | -1.84 | 2.16 | 0.40  | 0.31  | -0.03 | -0.16 | 1.44 | -0.31 | 0.21  | -0.55 | -0.28 | 0.06  | 0.55  | -0.20 | -0.25 | -0.12 | 1.36 | -0.53 | 0.18 | -0.60 |
| Zabori         | -1.41 | 1.63 | -0.15 | 0.50  | 0.05  | -0.22 | 1.27 | -0.70 | 0.04  | -0.40 | 0.15  | -0.59 | -0.38 | -0.33 | -0.61 | -0.37 | 1.27 | -1.08 | 0.47 | -0.75 |

| Municipality   | 2011  |       |       |       | 2012  |       |       |      | 2013  |       |       |       | 2014  |       |       |       | 2015  |       |       |       |
|----------------|-------|-------|-------|-------|-------|-------|-------|------|-------|-------|-------|-------|-------|-------|-------|-------|-------|-------|-------|-------|
|                | 6     | 7     | 8     | 9     | 6     | 7     | 8     | 9    | 6     | 7     | 8     | 9     | 6     | 7     | 8     | 9     | 6     | 7     | 8     | 9     |
| Bana           | -1.43 | -0.75 | 0.44  | -0.09 | -1.29 | 0.30  | -0.05 | 1.19 | 0.48  | -0.94 | -0.17 | -0.97 | -0.67 | -1.63 | -0.63 | 1.23  | -1.60 | -0.08 | 0.09  | 0.56  |
| Bengou         | -1.71 | -1.08 | 1.12  | -0.41 | -1.45 | 0.50  | -0.24 | 0.95 | 0.37  | -1.37 | -0.28 | -1.01 | -0.89 | -2.21 | -0.75 | 0.89  | -1.85 | -0.45 | 0.38  | 0.01  |
| Birni Ngaoure  | -1.16 | -1.33 | -0.12 | -0.49 | -1.04 | 0.91  | 0.61  | 0.86 | -0.05 | -0.82 | 0.86  | -1.04 | -0.92 | -0.26 | -0.25 | -0.06 | -1.13 | 0.36  | 0.44  | 0.60  |
| Dan Kassari    | 1.19  | -2.44 | -0.40 | -0.45 | -0.76 | -0.68 | -0.07 | 1.31 | -0.41 | -0.80 | 0.24  | -0.90 | -0.05 | 1.10  | -0.03 | 0.09  | -0.70 | -0.24 | 0.78  | 1.43  |
| Dioundiou      | -1.12 | -0.89 | -0.03 | -0.59 | -1.20 | 0.09  | 0.26  | 0.59 | 0.38  | -0.35 | 0.13  | -0.76 | -0.26 | -0.35 | -0.25 | 1.05  | -1.20 | 0.20  | 0.07  | 0.51  |
| Dogon Kirya    | 0.28  | -2.29 | -0.73 | -0.68 | -0.88 | -0.51 | 0.83  | 1.70 | -0.52 | -1.09 | 0.88  | -1.01 | -0.07 | 0.58  | 0.04  | -0.43 | -0.80 | -0.22 | 0.63  | 1.16  |
| Dogondoutchi   | -0.07 | -2.04 | -0.40 | -0.43 | -1.33 | -0.11 | 0.09  | 0.68 | -0.21 | -0.91 | 0.68  | -0.90 | -0.13 | 0.05  | -0.08 | -0.33 | -1.07 | -0.22 | 0.33  | 1.18  |
| Dosso          | -0.86 | -1.25 | -0.03 | -0.64 | -1.19 | 0.90  | 0.74  | 1.04 | 0.08  | -1.11 | 0.64  | -1.02 | -0.39 | -0.38 | -0.28 | -0.06 | -0.90 | 0.27  | 0.51  | 0.70  |
| Doumega        | -0.51 | -1.37 | -0.20 | -0.39 | -1.23 | -0.12 | 0.10  | 0.39 | 0.04  | -0.73 | -0.08 | -0.97 | -0.20 | -0.10 | -0.07 | 0.51  | -0.81 | -0.12 | -0.05 | 0.71  |
| Fabidji        | -1.38 | -1.21 | 0.03  | -0.57 | -1.13 | 0.80  | 0.56  | 0.98 | 0.36  | -0.79 | 0.74  | -1.05 | -0.52 | -0.17 | -0.22 | 0.21  | -1.26 | 0.28  | 0.35  | 0.56  |
| Fakara         | -1.56 | -1.26 | -0.07 | -0.51 | -1.11 | 0.88  | 0.52  | 0.66 | -0.05 | -0.95 | 1.00  | -1.12 | -0.97 | -0.42 | -0.17 | 0.19  | -0.77 | 0.21  | 0.43  | 0.43  |
| Falmey         | -1.50 | -0.88 | 0.16  | -0.77 | -0.81 | 0.60  | 0.52  | 0.91 | 0.14  | -0.73 | 0.40  | -0.98 | -0.23 | -0.48 | -0.32 | 0.58  | -1.44 | 0.19  | 0.10  | 0.51  |
| Falwel         | -0.42 | -1.82 | -0.44 | -0.70 | -1.51 | 0.22  | 0.27  | 0.59 | -0.27 | -0.88 | 0.87  | -1.16 | -0.25 | -0.20 | -0.25 | -0.65 | -0.79 | 0.29  | 0.19  | 0.97  |
| Farrey         | -1.36 | -0.85 | -0.02 | -0.69 | -0.92 | 0.16  | 0.48  | 0.87 | 0.34  | -0.47 | 0.15  | -0.74 | -0.04 | -0.47 | -0.41 | 0.88  | -1.23 | 0.19  | 0.07  | 0.66  |
| Garankedey     | -0.64 | -1.34 | -0.40 | -0.71 | -1.39 | 0.57  | 0.62  | 0.71 | -0.02 | -0.82 | 1.13  | -1.15 | -0.66 | -0.39 | -0.39 | -0.31 | -0.63 | 0.45  | 0.44  | 0.68  |
| Gaya           | -1.89 | -0.95 | 0.96  | -0.48 | -1.16 | 0.45  | -0.22 | 1.08 | 0.62  | -1.11 | 0.00  | -1.08 | -0.82 | -2.33 | -0.60 | 0.50  | -2.17 | -0.24 | 0.46  | -0.28 |
| Golle          | -1.24 | -1.16 | 0.07  | -0.68 | -1.06 | 0.85  | 0.54  | 0.84 | 0.19  | -0.94 | 0.36  | -1.06 | -0.23 | -0.06 | -0.27 | -0.04 | -1.20 | 0.26  | 0.35  | 0.40  |
| Gorou Bakassam | -0.95 | -1.44 | -0.11 | -0.51 | -1.52 | 0.42  | 0.79  | 0.99 | 0.13  | -0.87 | 0.50  | -1.14 | -0.01 | 0.04  | -0.20 | 0.02  | -0.79 | 0.56  | 0.74  | 0.68  |
| Guechemé       | -0.51 | -1.37 | -0.20 | -0.39 | -1.23 | -0.12 | 0.10  | 0.39 | 0.04  | -0.73 | -0.08 | -0.97 | -0.20 | -0.10 | -0.07 | 0.51  | -0.81 | -0.12 | -0.05 | 0.71  |
| Guilladje      | -1.50 | -0.88 | 0.16  | -0.77 | -0.81 | 0.60  | 0.52  | 0.91 | 0.14  | -0.73 | 0.40  | -0.98 | -0.23 | -0.48 | -0.32 | 0.58  | -1.44 | 0.19  | 0.10  | 0.51  |
| Harikanassou   | -1.10 | -1.26 | -0.43 | -0.81 | -1.00 | 0.87  | 0.41  | 0.73 | -0.09 | -0.66 | 1.26  | -1.36 | -0.92 | -0.55 | -0.44 | -0.32 | -0.81 | 0.46  | 0.45  | 0.67  |
| Kankandi       | -1.38 | -1.21 | 0.03  | -0.57 | -1.13 | 0.80  | 0.56  | 0.98 | 0.36  | -0.79 | 0.74  | -1.05 | -0.52 | -0.17 | -0.22 | 0.21  | -1.26 | 0.28  | 0.35  | 0.56  |
| Kara Kara      | -0.99 | -1.35 | -0.11 | -0.54 | -1.31 | -0.09 | 0.37  | 0.51 | 0.13  | -0.66 | 0.14  | -0.99 | 0.10  | -0.06 | -0.03 | 0.49  | -0.89 | 0.27  | 0.32  | 0.64  |
| Kargui Bangou  | -0.99 | -1.35 | -0.11 | -0.54 | -1.31 | -0.09 | 0.37  | 0.51 | 0.13  | -0.66 | 0.14  | -0.99 | 0.10  | -0.06 | -0.03 | 0.49  | -0.89 | 0.27  | 0.32  | 0.64  |
| Kieché         | 0.30  | -2.47 | -0.69 | -0.21 | -0.88 | -0.69 | -0.30 | 0.51 | 0.00  | -0.82 | 0.00  | -0.79 | -0.18 | 0.54  | -0.08 | 0.06  | -0.98 | -0.29 | 0.18  | 0.98  |
| Kiota          | -1.10 | -1.26 | -0.43 | -0.81 | -1.00 | 0.87  | 0.41  | 0.73 | -0.09 | -0.66 | 1.26  | -1.36 | -0.92 | -0.55 | -0.44 | -0.32 | -0.81 | 0.46  | 0.45  | 0.67  |
| Kore Mairoua   | -0.10 | -2.14 | -0.55 | -0.49 | -1.26 | -0.38 | 0.06  | 0.75 | -0.04 | -0.68 | 0.25  | -0.81 | -0.09 | 0.36  | -0.14 | 0.01  | -1.03 | -0.03 | 0.26  | 1.12  |
| Koygolo        | -1.25 | -1.46 | -0.51 | -0.84 | -0.82 | 0.60  | 0.16  | 0.87 | -0.05 | -0.46 | 1.30  | -1.49 | -0.91 | -0.15 | -0.44 | -0.43 | -0.79 | 0.41  | 0.18  | 0.63  |
| Loga           | -0.53 | -1.74 | -0.61 | -0.87 | -1.55 | 0.37  | -0.07 | 0.67 | -0.03 | -0.71 | 0.83  | -1.12 | -0.42 | -0.18 | -0.36 | -0.50 | -0.50 | 0.64  | -0.06 | 1.06  |
| Matankari      | 0.35  | -2.34 | -0.71 | -0.40 | -1.02 | -0.48 | 0.05  | 1.08 | -0.15 | -1.09 | 0.56  | -0.88 | 0.05  | 0.56  | 0.12  | -0.10 | -0.83 | -0.42 | 0.76  | 1.47  |
| Mokko          | -0.76 | -1.60 | -0.27 | -0.60 | -1.67 | 0.45  | 0.47  | 0.66 | -0.28 | -0.86 | 0.83  | -1.11 | -0.44 | -0.24 | -0.45 | -0.25 | -0.84 | 0.38  | 0.21  | 0.74  |
| Ngonga         | -1.16 | -1.33 | -0.12 | -0.49 | -1.04 | 0.91  | 0.61  | 0.86 | -0.05 | -0.82 | 0.86  | -1.04 | -0.92 | -0.26 | -0.25 | -0.06 | -1.13 | 0.36  | 0.44  | 0.60  |
| Sambere        | -1.43 | -0.71 | 0.28  | -0.45 | -0.57 | 0.27  | 0.58  | 1.22 | 0.34  | -0.43 | 0.16  | -0.86 | -0.36 | -1.11 | -0.39 | 0.94  | -1.51 | 0.03  | -0.25 | 0.58  |
| Sokorbe        | -0.64 | -1.34 | -0.40 | -0.71 | -1.39 | 0.57  | 0.62  | 0.71 | -0.02 | -0.82 | 1.13  | -1.15 | -0.66 | -0.39 | -0.39 | -0.31 | -0.63 | 0.45  | 0.44  | 0.68  |
| Soucoucoutane  | -0.36 | -2.18 | -0.87 | -0.78 | -1.09 | -0.45 | 0.53  | 1.69 | -0.54 | -1.32 | 0.97  | -1.02 | 0.07  | 0.18  | 0.15  | -0.73 | -0.86 | -0.06 | 0.68  | 1.41  |
| Tanda          | -1.78 | -0.58 | 0.57  | -0.22 | -0.90 | 0.37  | 0.15  | 1.31 | 0.53  | -0.65 | -0.14 | -0.94 | -0.55 | -1.82 | -0.52 | 0.78  | -1.89 | 0.03  | -0.12 | 0.16  |
| Tessa          | -1.08 | -1.35 | 0.10  | -0.62 | -1.21 | 0.21  | 0.40  | 0.77 | 0.10  | -0.76 | 0.11  | -1.04 | -0.02 | -0.08 | -0.14 | 0.33  | -1.16 | 0.31  | 0.36  | 0.67  |
| Tibiri         | -0.29 | -2.03 | -0.46 | -0.28 | -1.09 | -0.16 | -0.14 | 0.69 | -0.08 | -0.73 | 0.03  | -0.87 | -0.23 | 0.37  | -0.06 | 0.32  | -0.99 | 0.06  | 0.28  | 0.95  |
| Tombokoarey 1  | -0.46 | -2.04 | -0.43 | -0.51 | -1.63 | 0.05  | 0.30  | 0.82 | -0.26 | -0.73 | 0.68  | -0.95 | -0.24 | 0.00  | -0.15 | 0.08  | -1.09 | 0.32  | 0.26  | 1.12  |
| Tombokoarey2   | -0.46 | -2.04 | -0.43 | -0.51 | -1.63 | 0.05  | 0.30  | 0.82 | -0.26 | -0.73 | 0.68  | -0.95 | -0.24 | 0.00  | -0.15 | 0.08  | -1.09 | 0.32  | 0.26  | 1.12  |
| Tounouga       | -1.71 | -1.08 | 1.12  | -0.41 | -1.45 | 0.50  | -0.24 | 0.95 | 0.37  | -1.37 | -0.28 | -1.01 | -0.89 | -2.21 | -0.75 | 0.89  | -1.85 | -0.45 | 0.38  | 0.01  |
| Yelou          | -1.78 | -0.58 | 0.57  | -0.22 | -0.90 | 0.37  | 0.15  | 1.31 | 0.53  | -0.65 | -0.14 | -0.94 | -0.55 | -1.82 | -0.52 | 0.78  | -1.89 | 0.03  | -0.12 | 0.16  |
| Zabori         | -1.12 | -0.89 | -0.03 | -0.59 | -1.20 | 0.09  | 0.26  | 0.59 | 0.38  | -0.35 | 0.13  | -0.76 | -0.26 | -0.35 | -0.25 | 1.05  | -1.20 | 0.20  | 0.07  | 0.51  |

| Municipality   | 2016  |       |       |       | 2017  |       |       |       |
|----------------|-------|-------|-------|-------|-------|-------|-------|-------|
|                | 6     | 7     | 8     | 9     | 6     | 7     | 8     | 9     |
| Bana           | -0.36 | -0.95 | -0.32 | 1.37  | 1.04  | -0.18 | -0.52 | -0.48 |
| Bengou         | -0.23 | -1.31 | -0.31 | 0.97  | 0.62  | -0.35 | -0.20 | -0.44 |
| Birni Ngaoure  | -1.10 | -0.56 | -0.37 | 0.46  | 1.52  | 0.31  | -0.59 | -1.29 |
| Dan Kassari    | -0.60 | 1.00  | -1.06 | -0.33 | -0.10 | 0.29  | -1.22 | -0.88 |
| Dioundiou      | -0.56 | -0.88 | -0.62 | 0.82  | 1.41  | -0.37 | -0.72 | -1.03 |
| Dogon Kirya    | -0.21 | 1.10  | -1.16 | -0.06 | -0.28 | 0.08  | -1.07 | -1.24 |
| Dogondoutchi   | -0.79 | 0.14  | -0.76 | -0.68 | 0.15  | -0.08 | -0.84 | -1.13 |
| Dosso          | -1.16 | -0.78 | -0.45 | 0.52  | 1.69  | 0.22  | -0.83 | -1.29 |
| Doumeka        | -0.59 | -0.67 | -0.67 | -0.24 | 0.49  | -0.40 | -1.02 | -1.15 |
| Fabidji        | -0.93 | -0.71 | -0.32 | 0.71  | 2.51  | -0.09 | -0.64 | -1.21 |
| Fakara         | -0.23 | -0.66 | -0.25 | 0.38  | 2.46  | 0.06  | -0.35 | -1.14 |
| Falmey         | -0.61 | -1.06 | -0.37 | 0.96  | 2.99  | -0.46 | -0.71 | -1.22 |
| Falwel         | -0.38 | 0.05  | -0.99 | -0.73 | 0.31  | 0.21  | -0.75 | -1.26 |
| Farrey         | -0.63 | -1.06 | -0.54 | 0.90  | 2.10  | -0.33 | -0.84 | -0.94 |
| Garankedey     | -0.84 | -0.64 | -0.51 | 0.25  | 1.00  | 0.42  | -0.63 | -1.31 |
| Gaya           | -0.48 | -1.35 | -0.07 | 0.34  | 0.76  | -0.28 | -0.03 | -0.48 |
| Golle          | -1.02 | -0.65 | -0.49 | 0.33  | 2.24  | -0.15 | -1.04 | -1.34 |
| Gorou Bakassam | -1.13 | -0.55 | -0.38 | 0.16  | 1.61  | 0.32  | -0.69 | -1.33 |
| Guechemé       | -0.59 | -0.67 | -0.67 | -0.24 | 0.49  | -0.40 | -1.02 | -1.15 |
| Guilladjé      | -0.61 | -1.06 | -0.37 | 0.96  | 2.99  | -0.46 | -0.71 | -1.22 |
| Harikanassou   | -0.51 | -0.57 | -0.55 | 0.20  | 1.34  | 0.20  | -0.56 | -1.16 |
| Kankandi       | -0.93 | -0.71 | -0.32 | 0.71  | 2.51  | -0.09 | -0.64 | -1.21 |
| Kara Kara      | -0.51 | -0.60 | -0.62 | 0.05  | 1.22  | -0.19 | -0.95 | -1.23 |
| Kargui Bangou  | -0.51 | -0.60 | -0.62 | 0.05  | 1.22  | -0.19 | -0.95 | -1.23 |
| Kieché         | -0.95 | 0.23  | -0.84 | -0.57 | 0.32  | -0.18 | -1.27 | -1.03 |
| Kiota          | -0.51 | -0.57 | -0.55 | 0.20  | 1.34  | 0.20  | -0.56 | -1.16 |
| Kore Mairoua   | -1.24 | 0.03  | -0.80 | -0.58 | 0.27  | 0.12  | -0.86 | -1.12 |
| Koygolo        | -0.28 | -0.61 | -0.86 | 0.57  | 0.73  | 0.30  | -0.52 | -1.45 |
| Loga           | 0.07  | -0.07 | -1.19 | -0.29 | 0.54  | 0.53  | -0.99 | -1.31 |
| Matankari      | -0.40 | 0.64  | -0.91 | -0.30 | -0.05 | 0.22  | -0.99 | -1.05 |
| Mokko          | -0.79 | -0.50 | -0.72 | 0.02  | 0.83  | 0.33  | -0.68 | -1.42 |
| Ngonga         | -1.10 | -0.56 | -0.37 | 0.46  | 1.52  | 0.31  | -0.59 | -1.29 |
| Sambere        | -0.87 | -1.52 | -0.33 | 1.27  | 2.39  | -0.40 | -0.49 | -0.68 |
| Sokorbe        | -0.84 | -0.64 | -0.51 | 0.25  | 1.00  | 0.42  | -0.63 | -1.31 |
| Soucoucoutane  | -0.24 | 0.83  | -0.96 | 0.06  | -0.47 | 0.32  | -0.94 | -1.31 |
| Tanda          | -0.80 | -1.20 | -0.33 | 0.79  | 1.46  | -0.26 | -0.47 | -0.62 |
| Tessa          | -0.89 | -0.64 | -0.62 | 0.39  | 1.89  | -0.20 | -1.01 | -1.20 |
| Tibiri         | -1.17 | -0.36 | -0.68 | -0.61 | 0.22  | 0.03  | -1.04 | -1.14 |
| Tombokoarey 1  | -1.08 | -0.09 | -0.77 | -0.47 | 0.40  | 0.24  | -0.67 | -1.13 |
| Tombokoarey2   | -1.08 | -0.09 | -0.77 | -0.47 | 0.40  | 0.24  | -0.67 | -1.13 |
| Tounouga       | -0.23 | -1.31 | -0.31 | 0.97  | 0.62  | -0.35 | -0.20 | -0.44 |
| Yelou          | -0.80 | -1.20 | -0.33 | 0.79  | 1.46  | -0.26 | -0.47 | -0.62 |
| Zabori         | -0.56 | -0.88 | -0.62 | 0.82  | 1.41  | -0.37 | -0.72 | -1.03 |
